# Supplementary material for: The Effect of Circulating Zinc, Selenium, Copper and Vitamin K1 on COVID-19 Outcomes: A Mendelian Randomization Study
Source: MDPI journal article supplement (doi:10.3390/nu14020233), 2022-01-06
Supplement: s1 [file s1]

## STROBE-MR checklist

### 1. TITLE and ABSTRACT

Indicate Mendelian randomization as the study's design in the title and/or the abstract.

[Mendelian randomization mentioned in title and abstract.](#)

## INTRODUCTION

### 2. Background

Explain the scientific background and rationale for the reported study. Is causality between exposure and outcome plausible? Justify why MR is a helpful method to address the study question.

[Introduction: lines 39-109](#)

### 3. Objectives

State specific objectives clearly, including pre-specified causal hypotheses (if any).

[Abstract: lines 7-9](#)

## METHODS

### 4. Study design and data sources

Present key elements of study design early in the paper. Consider including a table listing sources of data for all phases of the study. For each data source contributing to the analysis, describe the following:

a) Describe the study design and the underlying population from which it was drawn. Describe also the setting, locations, and relevant dates, including periods of recruitment, exposure, follow-up, and data collection, if available.

[Supplementary Table S5, Methods: lines 118-141, 198-206](#)

b) Give the eligibility criteria, and the sources and methods of selection of participants.

[Supplementary Table S5, Methods: lines 118-141, 198-206](#)

c) Explain how the analyzed sample size was arrived at.

[Supplementary Table S5, Methods: lines 118-141, 198-206](#)

d) Describe measurement, quality and selection of genetic variants.

[Methods: lines 147-172](#)

e) For each exposure, outcome and other relevant variables, describe methods of assessment and, in the case of diseases, the diagnostic criteria used.

[Supplementary Table S5, Methods: lines 118-141, 198-206](#)

f) Provide details of ethics committee approval and participant informed consent, if relevant.

[Methods: lines 219-223](#)

## 5. Assumptions

Explicitly state assumptions for the main analysis (e.g. relevance, exclusion, independence, homogeneity) as well assumptions for any additional or sensitivity analysis.

Methods: lines 113, 183-187, 188, 211-218

## 6. Statistical methods: main analysis

Describe statistical methods and statistics used.

Methods: lines 207-218

a) Describe how quantitative variables were handled in the analyses (i.e., scale, units, model).

Completed throughout the manuscript

b) Describe the process for identifying genetic variants and weights to be included in the analyses (i.e, independence and model). Consider a flow diagram.

Methods, lines 147-182, Supplementary methods, Supplementary Figure S1

c) Describe the MR estimator, e.g. two-stage least squares, Wald ratio, and related statistics. Detail the included covariates and, in case of two-sample MR, whether the same covariate set was used for adjustment in the two samples.

Methods, lines: 124-125, 130-133, 140-141, 206, 210-211

d) Explain how missing data were addressed.

Methods, lines 144-146

e) If applicable, say how multiple testing was dealt with.

Results, lines: 266-267

## 7. Assessment of assumptions

Describe any methods used to assess the assumptions or justify their validity.

Supplementary methods, Methods, lines: 183-197

## 8. Sensitivity analyses

Describe any sensitivity analyses or additional analyses performed.

Methods, lines: 173-182

## 9. Software and pre-registration

a) Name statistical software and package(s), including version and settings used.

Methods, lines: 208-210

b) State whether the study protocol and details were pre-registered (as well as when and where).

N/A

## RESULTS

### 10. Descriptive data

a) Report the numbers of individuals at each stage of included studies and reasons for exclusion. Consider use of a flow-diagram.

[Supplementary Tables S1 and S5](#)

b) Report summary statistics for phenotypic exposure(s), outcome(s) and other relevant variables (e.g. means, standard deviations, proportions).

[Supplementary Tables S1 and S2](#)

c) If the data sources include meta-analyses of previous studies, provide the number of studies, their reported ancestry, if available, and assessments of heterogeneity across these studies. Consider using a supplementary table for each data source.

[Methods, lines: 126-133](#)

d) For two-sample Mendelian randomization: i. Provide information on the similarity of the genetic variant-exposure associations between the exposure and outcome samples. ii. Provide information on extent of sample overlap between the exposure and outcome data sources.

[N/A](#)

### 11. Main results

a) Report the associations between genetic variant and exposure, and between genetic variant and outcome, preferably on an interpretable scale (e.g. comparing 25th and 75th percentile of allele count or genetic risk score, if individual-level data available).

[Supplementary Tables S1 and S2](#)

b) Report causal effect estimate between exposure and outcome, and the measures of uncertainty from the MR analysis. Use an intuitive scale, such as odds ratio, or relative risk, per standard deviation difference.

[Table 1, Supplementary Table S8, Results, lines: 238-298](#)

c) If relevant, consider translating estimates of relative risk into absolute risk for a meaningful time-period.

[N/A](#)

d) Consider any plots to visualize results (e.g. forest plot, scatterplot of associations between genetic variants and outcome versus between genetic variants and exposure).

[Figure 1-4](#)

### 12. Assessment of assumptions

a) Assess the validity of the assumptions.

[Supplementary methods, Methods, lines: 183-197](#)

b) Report any additional statistics (e.g., assessments of heterogeneity, such as I<sup>2</sup>, Q statistic).

[Results, lines 299-305, Table S1](#)

### 13. Sensitivity and additional analyses

a) Use sensitivity analyses to assess the robustness of the main results to violations of the assumptions.

[Results, lines: 299-304](#)

b) Report results from other sensitivity analyses (e.g., replication study with different dataset, analyses of subgroups, validation of instrument(s), simulations, etc.).

[Results, lines: 249-286](#)

c) Report any assessment of direction of causality (e.g., bidirectional MR).

[N/A](#)

d) When relevant, report and compare with estimates from non-MR analyses.

[N/A](#)

e) Consider any additional plots to visualize results (e.g., leave-one-out analyses).

[Available on request](#)

## DISCUSSION

### 14. Key results

Summarize key results with reference to study objectives.

[Discussion, lines: 307-310](#)

### 15. Limitations

Discuss limitations of the study, taking into account the validity of the MR assumptions, other sources of potential bias, and imprecision. Discuss both direction and magnitude of any potential bias, and any efforts to address them.

[Discussion, lines: 362-395](#)

### 16. Interpretation

a) Give a cautious overall interpretation of results considering objectives and limitations. Compare with results from other relevant studies.

[Discussion, lines: 311-347](#)

b) Discuss underlying biological mechanisms that could be modelled by using the genetic variants to assess the relationship between the exposure and the outcome.

[Discussion, lines: 392-395](#)

c) Discuss whether the results have clinical or policy relevance, and whether interventions could have the same size effect.

[Discussion, lines: 387-401](#)

## 17. Generalizability

Discuss the generalizability of the study results

(a) to other populations (i.e. external validity),

[Discussion, lines: 373-376](#)

(b) across other exposure periods/timings,

[Discussion, lines: 330-337](#)

(c) across other levels of exposure.

[Discussion, lines: 387-395](#)

## OTHER INFORMATION

### 18. Funding

Give the source of funding and the role of the funders for the present study and, if applicable, for the original study or studies on which the present article is based.

[The following sections: Sources of support for this work, Conflict of interest and funding disclosure](#)

### 19. Data and data sharing

Present data used to perform all analyses or report where and how the data can be accessed. State whether statistical code is publicly accessible and if so, where.

[Data sharing section](#)

### 20. Conflicts of Interest

All authors should declare all potential conflicts of interest.

[Conflict of interest and funding disclosure section](#)
