# Supplementary material for: The Effect of Circulating Zinc, Selenium, Copper and Vitamin K1 on COVID-19 Outcomes: A Mendelian Randomization Study
Source: Nutrients. 2022 Jan 6;14(2):233. doi: 10.3390/nu14020233 (PMC8780111; doi:10.3390/nu14020233)
Supplement: Supplementary file 1 [file nutrients-14-00233-s001.zip]

Archive with 4 entries (4 files):
- Figure S1.pdf
- STROBE-MR checklist.pdf
- Supplementary Methods.pdf
- Supplementary Tables.xlsx
