# Supplementary material for: The Effect of Circulating Zinc, Selenium, Copper and Vitamin K1 on COVID-19 Outcomes: A Mendelian Randomization Study
Source: Nutrients. 2022 Jan 6;14(2):233. doi: 10.3390/nu14020233 (PMC8780111; doi:10.3390/nu14020233)
Supplement: Supplementary file 1 [file nutrients-14-00233-s001.zip › Supplementary Tables.xlsx]

## Sheet: Table S1
Supplementary Table 1
exposure	variant id	chromosome	position (GRCh38)	effect allele	non-effect allele	eaf	beta	se	p-value	N	F-statistic	% variance explained	GWAS source	unit
zinc	rs2120019	15	75041843	C	T	0.211	-0.287	0.033	1.55 x 10-18	2603	75.5792	2.82372	Evans2013	per SD
zinc	rs1532423	8	85356084	A	G	0.409	0.178	0.026	6.4 x 10-12	2603	46.8338	1.76876	Evans2013	per SD
selenium	rs921943	5	79020653	T	C	0.295	0.293477	0.0223346	1.9 x 10-39	9639	172.624	1.75974	Cornelis2015	NA
selenium	rs6859667	5	79449219	C	T	0.043261	-0.346454	0.0500656	4.40 x 10-12	9639	47.8765	0.494343	Cornelis2015	NA
copper	rs1175550	1	3774964	G	A	0.238	0.198	0.032	5.03 x 10-10	2603	38.2557	1.44949	Evans2013	per SD
copper	rs2769264	1	151372265	G	T	0.181	0.313	0.034	2.63 x 10-20	2603	84.6832	3.15313	Evans2013	per SD
vitamin K1	rs4645543	8	139483999	T	C	0.048	-0.42	0.08	2 x 10-7	2138	27.5367	1.27276	Dashti2014	natural log transformed nmol/L vitamin K1
vitamin K1	rs4852146	2	79397862	C	T	0.311	0.18	0.04	2.08 x 10-6	2138	20.2311	0.93826	Dashti2014	natural log transformed nmol/L vitamin K1
vitamin K1	rs6862071	5	115784571	T	A	0.01	-0.94	0.22	2.29 x x 10-5	2138	18.2391	0.846662	Dashti2014	natural log transformed nmol/L vitamin K1

## Sheet: Table S2
Supplementary Table 2
exposure	variant_ID	chromosome	position (GRCh38)	effect allele	non-effect allele	eaf	beta	se	p-value	N	F-statistic	% variance explained	GWAS source	unit
zinc	rs7569234	2	16371695	C	T	0.04	-0.539	0.118	5.13003e-06	2603	20.8487	0.795192	Evans2013	SD
zinc	rs4333127	4	5928306	G	A	0.09	0.218	0.047	2.99999e-06	2603	21.4973	0.819725	Evans2013	SD
zinc	rs17511001	4	108512202	A	G	0.302	-0.132	0.029	7.11001e-06	2603	20.7023	0.78965	Evans2013	SD
zinc	rs11763353	7	15591246	G	A	0.14	0.192	0.039	6.90001e-07	2603	24.2181	0.922516	Evans2013	SD
zinc	rs13273360	8	84908775	T	C	0.41	-0.143	0.027	1.75001e-07	2603	28.0292	1.06614	Evans2013	SD
zinc	rs11232535	11	81217766	C	T	0.055	-0.325	0.065	6.72992e-07	2603	24.9808	0.951294	Evans2013	SD
zinc	rs7148590	14	65006478	G	A	0.5	-0.14	0.026	1.37e-07	2603	28.9718	1.1016	Evans2013	SD
zinc	rs10484101	14	86351282	C	T	0.09	0.209	0.045	3.34003e-06	2603	21.5543	0.821882	Evans2013	SD
zinc	rs17097781	14	98756970	T	C	0.069	0.242	0.055	9.34997e-06	2603	19.3451	0.738266	Evans2013	SD
zinc	rs2120019	15	75041843	C	T	0.211	0.287	0.033	1.54989e-18	2603	75.5792	2.82372	Evans2013	SD
zinc	rs11638477	15	75180886	T	G	0.452	-0.223	0.028	1.00995e-15	2603	63.3811	2.37883	Evans2013	SD
zinc	rs8099461	18	48412044	G	A	0.053	0.278	0.061	5.21003e-06	2603	20.7537	0.791597	Evans2013	SD
Se - ALSPAC	rs17771017	2	46730648	G	A	0.029	0.21	0.047	8.23e-06	2874	19.9499	0.689842	Evans2013	SD
Se - ALSPAC	rs1153734	2	182867579	G	A	0.241	0.138	0.031	9.67008e-06	2874	19.8031	0.6848	Evans2013	SD
Se - ALSPAC	rs1521328	3	153979232	G	A	0.211	0.145	0.033	8.12999e-06	2874	19.2933	0.667289	Evans2013	SD
Se - ALSPAC	rs6823178	4	56008076	A	G	0.366	0.125	0.026	2.32001e-06	2874	23.0978	0.797825	Evans2013	SD
Se - ALSPAC	rs921943	5	79020653	T	C	0.296	-0.264	0.03	1.42988e-18	2874	77.3861	2.6238	Evans2013	SD
Se - ALSPAC	rs694290	5	79125957	G	A	0.316	-0.143	0.028	2.67997e-07	2874	26.0648	0.899385	Evans2013	SD
Se - ALSPAC	rs11948804	5	79507955	T	C	0.087	-0.236	0.047	3.89996e-07	2874	25.1957	0.869657	Evans2013	SD
Se - ALSPAC	rs9348626	6	24052298	C	T	0.465	-0.116	0.026	9.84011e-06	2874	19.8915	0.687836	Evans2013	SD
Se - ALSPAC	rs667707	10	101303680	C	T	0.311	-0.13	0.029	6.59994e-06	2874	20.0811	0.694349	Evans2013	SD
Se - ALSPAC	rs2631524	16	55183220	G	A	0.207	-0.15	0.032	1.98002e-06	2874	21.9574	0.758731	Evans2013	SD
Se - ALSPAC	rs12951643	17	48504656	A	G	0.08	0.232	0.047	8.00995e-07	2874	24.3488	0.840673	Evans2013	SD
Se - ALSPAC	rs9609603	22	32621883	C	T	0.386	-0.123	0.027	4e-06	2874	20.7386	0.716921	Evans2013	SD
Se - QIMR	rs566108	1	86040177	C	A	0.082	-0.201	0.045	9.91996e-06	2603	19.9358	0.760636	Evans2013	SD
Se - QIMR	rs4950779	1	202573074	C	T	0.04	-0.673	0.132	3.16002e-07	2603	25.9746	0.988764	Evans2013	SD
Se - QIMR	rs9309294	2	57162863	G	A	0.025	0.133	0.03	7.72005e-06	2603	19.6393	0.74941	Evans2013	SD
Se - QIMR	rs2461362	2	168817669	T	C	0.101	0.242	0.054	8.19993e-06	2603	20.0682	0.765651	Evans2013	SD
Se - QIMR	rs1492483	3	112129138	G	A	0.391	-0.13	0.029	8.16e-06	2603	20.0797	0.766084	Evans2013	SD
Se - QIMR	rs10023369	4	62930825	G	A	0.487	-0.144	0.029	4.41998e-07	2603	24.6374	0.93834	Evans2013	SD
Se - QIMR	rs4467633	4	65514002	T	C	0.268	-0.141	0.032	9.29009e-06	2603	19.4001	0.74035	Evans2013	SD
Se - QIMR	rs478651	5	78994859	T	C	0.486	-0.177	0.037	1.71002e-06	2603	22.867	0.8715	Evans2013	SD
Se - QIMR	rs7700970	5	79115501	T	C	0.308	-0.265	0.037	7.16968e-13	2603	51.2572	1.93259	Evans2013	SD
Se - QIMR	rs10475981	5	171525626	A	C	0.01	1.483	0.328	6.27004e-06	2603	20.4268	0.779225	Evans2013	SD
Se - QIMR	rs713550	11	57126751	T	G	0.069	0.251	0.056	5.97998e-06	2603	20.0742	0.765876	Evans2013	SD
Se - QIMR	rs11114989	12	81717509	A	G	0.423	-0.13	0.029	7.91006e-06	2603	20.0797	0.766084	Evans2013	SD
Se - QIMR	rs4779561	15	31978245	T	C	0.23	0.139	0.031	9.94993e-06	2603	20.0897	0.766462	Evans2013	SD
Se - QIMR	rs7163368	15	63278922	C	T	0.218	-0.158	0.034	4e-06	2603	21.5786	0.822799	Evans2013	SD
Se - QIMR	rs3785832	17	61461433	C	T	0.427	0.146	0.031	1.81999e-06	2603	22.164	0.844935	Evans2013	SD
copper	rs1175550	1	3774964	G	A	0.238	-0.198	0.032	5.03002e-10	2603	38.2557	1.44949	Evans2013	SD
copper	rs2769264	1	151372265	G	T	0.181	-0.313	0.034	2.63027e-20	2603	84.6832	3.15313	Evans2013	SD
copper	rs2769270	1	151383382	A	G	0.141	0.349	0.046	4.36014e-14	2603	57.5177	2.16352	Evans2013	SD
copper	rs13074172	3	142634136	G	A	0.431	-0.121	0.027	7.15995e-06	2603	20.0682	0.765651	Evans2013	SD
copper	rs10014072	4	113027634	A	G	0.308	-0.164	0.034	1.13e-06	2603	23.2486	0.885913	Evans2013	SD
copper	rs12153606	5	85287951	T	G	0.186	0.159	0.034	2.5e-06	2603	21.8526	0.833161	Evans2013	SD
copper	rs9324493	8	138715738	G	A	0.128	0.177	0.039	5.94005e-06	2603	20.5818	0.785091	Evans2013	SD

## Sheet: Table S3
Supplementary Table 3
PhenoScanner
snp	ref_rsid	ref_hg19_coordinates	ref_hg38_coordinates	ref_a1	ref_a2	rsid	hg19_coordinates	hg38_coordinates	a1	a2	proxy	r2	dprime	trait	efo	study	pmid	ancestry	year	beta	se	p	direction	n	n_cases	n_controls	n_studies	unit	dataset
rs1175550	rs1175550	chr1:3691528	chr1:3774964	G	A	rs1175550	chr1:3691528	chr1:3774964	G	A	0	1	1	Hemoglobin concentration	EFO_0004586	Astle W	27863252	European	2016	0.03197	0.004206	2.932e-14	+	173480	0	173480	2	IVNT	Astle-W_Blood-Cell-Traits_EUR_2016
rs1175550	rs1175550	chr1:3691528	chr1:3774964	G	A	rs1175550	chr1:3691528	chr1:3774964	G	A	0	1	1	High light scatter percentage of red cells	EFO_0004586	Astle W	27863252	European	2016	0.05866	0.00425	2.498e-43	+	173480	0	173480	2	IVNT	Astle-W_Blood-Cell-Traits_EUR_2016
rs1175550	rs1175550	chr1:3691528	chr1:3774964	G	A	rs1175550	chr1:3691528	chr1:3774964	G	A	0	1	1	High light scatter reticulocyte count	EFO_0004586	Astle W	27863252	European	2016	0.063	0.00425	1.026e-49	+	173480	0	173480	2	IVNT	Astle-W_Blood-Cell-Traits_EUR_2016
rs1175550	rs1175550	chr1:3691528	chr1:3774964	G	A	rs1175550	chr1:3691528	chr1:3774964	G	A	0	1	1	Immature fraction of reticulocytes	EFO_0004586	Astle W	27863252	European	2016	0.04554	0.004211	2.974e-27	+	173480	0	173480	2	IVNT	Astle-W_Blood-Cell-Traits_EUR_2016
rs1175550	rs1175550	chr1:3691528	chr1:3774964	G	A	rs1175550	chr1:3691528	chr1:3774964	G	A	0	1	1	Mean corpuscular hemoglobin concentration	EFO_0004586	Astle W	27863252	European	2016	0.05687	0.004107	1.37e-43	+	173480	0	173480	2	IVNT	Astle-W_Blood-Cell-Traits_EUR_2016
rs1175550	rs1175550	chr1:3691528	chr1:3774964	G	A	rs1175550	chr1:3691528	chr1:3774964	G	A	0	1	1	Mean corpuscular volume	EFO_0004586	Astle W	27863252	European	2016	-0.03046	0.004184	3.322e-13	-	173480	0	173480	2	IVNT	Astle-W_Blood-Cell-Traits_EUR_2016
rs1175550	rs1175550	chr1:3691528	chr1:3774964	G	A	rs1175550	chr1:3691528	chr1:3774964	G	A	0	1	1	Red blood cell count	EFO_0004586	Astle W	27863252	European	2016	0.03013	0.004217	8.932e-13	+	173480	0	173480	2	IVNT	Astle-W_Blood-Cell-Traits_EUR_2016
rs1175550	rs1175550	chr1:3691528	chr1:3774964	G	A	rs1175550	chr1:3691528	chr1:3774964	G	A	0	1	1	Red cell distribution width	EFO_0004586	Astle W	27863252	European	2016	-0.03962	0.004197	3.719e-21	-	173480	0	173480	2	IVNT	Astle-W_Blood-Cell-Traits_EUR_2016
rs1175550	rs1175550	chr1:3691528	chr1:3774964	G	A	rs1175550	chr1:3691528	chr1:3774964	G	A	0	1	1	Reticulocyte count	EFO_0004586	Astle W	27863252	European	2016	0.05804	0.004256	2.439e-42	+	173480	0	173480	2	IVNT	Astle-W_Blood-Cell-Traits_EUR_2016
rs1175550	rs1175550	chr1:3691528	chr1:3774964	G	A	rs1175550	chr1:3691528	chr1:3774964	G	A	0	1	1	Reticulocyte fraction of red cells	EFO_0004586	Astle W	27863252	European	2016	0.05188	0.004254	3.287e-34	+	173480	0	173480	2	IVNT	Astle-W_Blood-Cell-Traits_EUR_2016
rs1175550	rs1175550	chr1:3691528	chr1:3774964	G	A	rs1175550	chr1:3691528	chr1:3774964	G	A	0	1	1	Copper levels	CHEBI_28694	Evans DM	23720494	European	2013	NA	NA	5.03e-10	NA	2603	-	-	-	-	GRASP
rs1175550	rs1175550	chr1:3691528	chr1:3774964	G	A	rs1175550	chr1:3691528	chr1:3774964	G	A	0	1	1	Mean corpuscular hemoglobin concentration	EFO_0004528	van der Harst P	23222517	Mixed	2012	NA	NA	8.6e-15	NA	71861	-	-	-	-	GRASP
rs1175550	rs1175550	chr1:3691528	chr1:3774964	G	A	rs1175550	chr1:3691528	chr1:3774964	G	A	0	1	1	Blood trace element Cu levels	EFO_0005267	Evans DM	23720494	European	2013	-0.198	0.03184	5e-10	-	-	-	-	-	unit decrease	NHGRI-EBI_GWAS_Catalog
rs1175550	rs1175550	chr1:3691528	chr1:3774964	G	A	rs1175550	chr1:3691528	chr1:3774964	G	A	0	1	1	High light scatter reticulocyte count	EFO_0007986	Astle W	27863252	European	2016	0.063	0.004249	1e-49	+	-	-	-	-	unit increase	NHGRI-EBI_GWAS_Catalog
rs1175550	rs1175550	chr1:3691528	chr1:3774964	G	A	rs1175550	chr1:3691528	chr1:3774964	G	A	0	1	1	High light scatter reticulocyte percentage of red cells	EFO_0007986	Astle W	27863252	European	2016	0.05866	0.004245	2e-43	+	-	-	-	-	unit increase	NHGRI-EBI_GWAS_Catalog
rs1175550	rs1175550	chr1:3691528	chr1:3774964	G	A	rs1175550	chr1:3691528	chr1:3774964	G	A	0	1	1	Immature fraction of reticulocytes	EFO_0007986	Astle W	27863252	European	2016	0.04554	0.004212	3e-27	+	-	-	-	-	unit increase	NHGRI-EBI_GWAS_Catalog
rs1175550	rs1175550	chr1:3691528	chr1:3774964	G	A	rs1175550	chr1:3691528	chr1:3774964	G	A	0	1	1	Mean corpuscular hemoglobin concentration	EFO_0004528	Astle W	27863252	European	2016	0.05687	0.004101	1e-43	+	-	-	-	-	unit increase	NHGRI-EBI_GWAS_Catalog
rs1175550	rs1175550	chr1:3691528	chr1:3774964	G	A	rs1175550	chr1:3691528	chr1:3774964	G	A	0	1	1	Red blood cell count	EFO_0004305	Astle W	27863252	European	2016	0.03013	0.004217	9e-13	+	-	-	-	-	unit increase	NHGRI-EBI_GWAS_Catalog
rs1175550	rs1175550	chr1:3691528	chr1:3774964	G	A	rs1175550	chr1:3691528	chr1:3774964	G	A	0	1	1	Reticulocyte count	EFO_0007986	Astle W	27863252	European	2016	0.05804	0.004251	2e-42	+	-	-	-	-	unit increase	NHGRI-EBI_GWAS_Catalog
rs1175550	rs1175550	chr1:3691528	chr1:3774964	G	A	rs1175550	chr1:3691528	chr1:3774964	G	A	0	1	1	Reticulocyte fraction of red cells	EFO_0007986	Astle W	27863252	European	2016	0.05188	0.004251	3e-34	+	-	-	-	-	unit increase	NHGRI-EBI_GWAS_Catalog
rs1175550	rs1175550	chr1:3691528	chr1:3774964	G	A	rs1184341	chr1:3691240	chr1:3774676	T	C	1	0.97686	0.98836	Hemoglobin concentration	EFO_0004586	Astle W	27863252	European	2016	0.03081	0.004221	2.917e-13	+	173480	0	173480	2	IVNT	Astle-W_Blood-Cell-Traits_EUR_2016
rs1175550	rs1175550	chr1:3691528	chr1:3774964	G	A	rs1184341	chr1:3691240	chr1:3774676	T	C	1	0.97686	0.98836	High light scatter percentage of red cells	EFO_0004586	Astle W	27863252	European	2016	0.05455	0.004265	1.882e-37	+	173480	0	173480	2	IVNT	Astle-W_Blood-Cell-Traits_EUR_2016
rs1175550	rs1175550	chr1:3691528	chr1:3774964	G	A	rs1184341	chr1:3691240	chr1:3774676	T	C	1	0.97686	0.98836	High light scatter reticulocyte count	EFO_0004586	Astle W	27863252	European	2016	0.05869	0.004265	4.344e-43	+	173480	0	173480	2	IVNT	Astle-W_Blood-Cell-Traits_EUR_2016
rs1175550	rs1175550	chr1:3691528	chr1:3774964	G	A	rs1184341	chr1:3691240	chr1:3774676	T	C	1	0.97686	0.98836	Immature fraction of reticulocytes	EFO_0004586	Astle W	27863252	European	2016	0.04149	0.004226	9.474e-23	+	173480	0	173480	2	IVNT	Astle-W_Blood-Cell-Traits_EUR_2016
rs1175550	rs1175550	chr1:3691528	chr1:3774964	G	A	rs1184341	chr1:3691240	chr1:3774676	T	C	1	0.97686	0.98836	Mean corpuscular hemoglobin concentration	EFO_0004586	Astle W	27863252	European	2016	0.05498	0.004122	1.381e-40	+	173480	0	173480	2	IVNT	Astle-W_Blood-Cell-Traits_EUR_2016
rs1175550	rs1175550	chr1:3691528	chr1:3774964	G	A	rs1184341	chr1:3691240	chr1:3774676	T	C	1	0.97686	0.98836	Mean corpuscular volume	EFO_0004586	Astle W	27863252	European	2016	-0.02885	0.004199	6.388e-12	-	173480	0	173480	2	IVNT	Astle-W_Blood-Cell-Traits_EUR_2016
rs1175550	rs1175550	chr1:3691528	chr1:3774964	G	A	rs1184341	chr1:3691240	chr1:3774676	T	C	1	0.97686	0.98836	Red blood cell count	EFO_0004586	Astle W	27863252	European	2016	0.02863	0.004232	1.331e-11	+	173480	0	173480	2	IVNT	Astle-W_Blood-Cell-Traits_EUR_2016
rs1175550	rs1175550	chr1:3691528	chr1:3774964	G	A	rs1184341	chr1:3691240	chr1:3774676	T	C	1	0.97686	0.98836	Red cell distribution width	EFO_0004586	Astle W	27863252	European	2016	-0.03514	0.004212	7.206e-17	-	173480	0	173480	2	IVNT	Astle-W_Blood-Cell-Traits_EUR_2016
rs1175550	rs1175550	chr1:3691528	chr1:3774964	G	A	rs1184341	chr1:3691240	chr1:3774676	T	C	1	0.97686	0.98836	Reticulocyte count	EFO_0004586	Astle W	27863252	European	2016	0.05451	0.004271	2.627e-37	+	173480	0	173480	2	IVNT	Astle-W_Blood-Cell-Traits_EUR_2016
rs1175550	rs1175550	chr1:3691528	chr1:3774964	G	A	rs1184341	chr1:3691240	chr1:3774676	T	C	1	0.97686	0.98836	Reticulocyte fraction of red cells	EFO_0004586	Astle W	27863252	European	2016	0.04854	0.004269	5.87e-30	+	173480	0	173480	2	IVNT	Astle-W_Blood-Cell-Traits_EUR_2016
rs1175550	rs1175550	chr1:3691528	chr1:3774964	G	A	rs1175552	chr1:3687739	chr1:3771175	A	C	1	0.93122	0.97064	Hemoglobin concentration	EFO_0004586	Astle W	27863252	European	2016	0.03111	0.004136	5.445e-14	+	173480	0	173480	2	IVNT	Astle-W_Blood-Cell-Traits_EUR_2016
rs1175550	rs1175550	chr1:3691528	chr1:3774964	G	A	rs1175552	chr1:3687739	chr1:3771175	A	C	1	0.93122	0.97064	High light scatter percentage of red cells	EFO_0004586	Astle W	27863252	European	2016	0.05279	0.00418	1.41e-36	+	173480	0	173480	2	IVNT	Astle-W_Blood-Cell-Traits_EUR_2016
rs1175550	rs1175550	chr1:3691528	chr1:3774964	G	A	rs1175552	chr1:3687739	chr1:3771175	A	C	1	0.93122	0.97064	High light scatter reticulocyte count	EFO_0004586	Astle W	27863252	European	2016	0.05698	0.004179	2.49e-42	+	173480	0	173480	2	IVNT	Astle-W_Blood-Cell-Traits_EUR_2016
rs1175550	rs1175550	chr1:3691528	chr1:3774964	G	A	rs1175552	chr1:3687739	chr1:3771175	A	C	1	0.93122	0.97064	Immature fraction of reticulocytes	EFO_0004586	Astle W	27863252	European	2016	0.04005	0.004141	3.962e-22	+	173480	0	173480	2	IVNT	Astle-W_Blood-Cell-Traits_EUR_2016
rs1175550	rs1175550	chr1:3691528	chr1:3774964	G	A	rs1175552	chr1:3687739	chr1:3771175	A	C	1	0.93122	0.97064	Mean corpuscular hemoglobin concentration	EFO_0004586	Astle W	27863252	European	2016	0.05432	0.004039	3.168e-41	+	173480	0	173480	2	IVNT	Astle-W_Blood-Cell-Traits_EUR_2016
rs1175550	rs1175550	chr1:3691528	chr1:3774964	G	A	rs1175552	chr1:3687739	chr1:3771175	A	C	1	0.93122	0.97064	Mean corpuscular volume	EFO_0004586	Astle W	27863252	European	2016	-0.02856	0.004114	3.869e-12	-	173480	0	173480	2	IVNT	Astle-W_Blood-Cell-Traits_EUR_2016
rs1175550	rs1175550	chr1:3691528	chr1:3774964	G	A	rs1175552	chr1:3687739	chr1:3771175	A	C	1	0.93122	0.97064	Red blood cell count	EFO_0004586	Astle W	27863252	European	2016	0.02908	0.004147	2.337e-12	+	173480	0	173480	2	IVNT	Astle-W_Blood-Cell-Traits_EUR_2016
rs1175550	rs1175550	chr1:3691528	chr1:3774964	G	A	rs1175552	chr1:3687739	chr1:3771175	A	C	1	0.93122	0.97064	Red cell distribution width	EFO_0004586	Astle W	27863252	European	2016	-0.03511	0.004127	1.795e-17	-	173480	0	173480	2	IVNT	Astle-W_Blood-Cell-Traits_EUR_2016
rs1175550	rs1175550	chr1:3691528	chr1:3774964	G	A	rs1175552	chr1:3687739	chr1:3771175	A	C	1	0.93122	0.97064	Reticulocyte count	EFO_0004586	Astle W	27863252	European	2016	0.05347	0.004185	2.237e-37	+	173480	0	173480	2	IVNT	Astle-W_Blood-Cell-Traits_EUR_2016
rs1175550	rs1175550	chr1:3691528	chr1:3774964	G	A	rs1175552	chr1:3687739	chr1:3771175	A	C	1	0.93122	0.97064	Reticulocyte fraction of red cells	EFO_0004586	Astle W	27863252	European	2016	0.04747	0.004183	7.642e-30	+	173480	0	173480	2	IVNT	Astle-W_Blood-Cell-Traits_EUR_2016
rs1175550	rs1175550	chr1:3691528	chr1:3774964	G	A	rs1181870	chr1:3684954	chr1:3768390	A	C	1	0.91478	0.95922	Hemoglobin concentration	EFO_0004586	Astle W	27863252	European	2016	0.03208	0.004191	1.963e-14	+	173480	0	173480	2	IVNT	Astle-W_Blood-Cell-Traits_EUR_2016
rs1175550	rs1175550	chr1:3691528	chr1:3774964	G	A	rs1181870	chr1:3684954	chr1:3768390	A	C	1	0.91478	0.95922	High light scatter percentage of red cells	EFO_0004586	Astle W	27863252	European	2016	0.05412	0.004235	2.139e-37	+	173480	0	173480	2	IVNT	Astle-W_Blood-Cell-Traits_EUR_2016
rs1175550	rs1175550	chr1:3691528	chr1:3774964	G	A	rs1181870	chr1:3684954	chr1:3768390	A	C	1	0.91478	0.95922	High light scatter reticulocyte count	EFO_0004586	Astle W	27863252	European	2016	0.0584	0.004235	2.895e-43	+	173480	0	173480	2	IVNT	Astle-W_Blood-Cell-Traits_EUR_2016
rs1175550	rs1175550	chr1:3691528	chr1:3774964	G	A	rs1181870	chr1:3684954	chr1:3768390	A	C	1	0.91478	0.95922	Immature fraction of reticulocytes	EFO_0004586	Astle W	27863252	European	2016	0.04086	0.004197	2.11e-22	+	173480	0	173480	2	IVNT	Astle-W_Blood-Cell-Traits_EUR_2016
rs1175550	rs1175550	chr1:3691528	chr1:3774964	G	A	rs1181870	chr1:3684954	chr1:3768390	A	C	1	0.91478	0.95922	Mean corpuscular hemoglobin concentration	EFO_0004586	Astle W	27863252	European	2016	0.05548	0.004094	7.615e-42	+	173480	0	173480	2	IVNT	Astle-W_Blood-Cell-Traits_EUR_2016
rs1175550	rs1175550	chr1:3691528	chr1:3774964	G	A	rs1181870	chr1:3684954	chr1:3768390	A	C	1	0.91478	0.95922	Mean corpuscular volume	EFO_0004586	Astle W	27863252	European	2016	-0.02901	0.00417	3.443e-12	-	173480	0	173480	2	IVNT	Astle-W_Blood-Cell-Traits_EUR_2016
rs1175550	rs1175550	chr1:3691528	chr1:3774964	G	A	rs1181870	chr1:3684954	chr1:3768390	A	C	1	0.91478	0.95922	Red blood cell count	EFO_0004586	Astle W	27863252	European	2016	0.0298	0.004202	1.335e-12	+	173480	0	173480	2	IVNT	Astle-W_Blood-Cell-Traits_EUR_2016
rs1175550	rs1175550	chr1:3691528	chr1:3774964	G	A	rs1181870	chr1:3684954	chr1:3768390	A	C	1	0.91478	0.95922	Red cell distribution width	EFO_0004586	Astle W	27863252	European	2016	-0.03542	0.004182	2.491e-17	-	173480	0	173480	2	IVNT	Astle-W_Blood-Cell-Traits_EUR_2016
rs1175550	rs1175550	chr1:3691528	chr1:3774964	G	A	rs1181870	chr1:3684954	chr1:3768390	A	C	1	0.91478	0.95922	Reticulocyte count	EFO_0004586	Astle W	27863252	European	2016	0.05494	0.004241	2.247e-38	+	173480	0	173480	2	IVNT	Astle-W_Blood-Cell-Traits_EUR_2016
rs1175550	rs1175550	chr1:3691528	chr1:3774964	G	A	rs1181870	chr1:3684954	chr1:3768390	A	C	1	0.91478	0.95922	Reticulocyte fraction of red cells	EFO_0004586	Astle W	27863252	European	2016	0.04875	0.004239	1.298e-30	+	173480	0	173480	2	IVNT	Astle-W_Blood-Cell-Traits_EUR_2016
rs1175550	rs1175550	chr1:3691528	chr1:3774964	G	A	rs1181870	chr1:3684954	chr1:3768390	A	C	1	0.91478	0.95922	Hemoglobin concentration	EFO_0004509	Astle W	27863252	European	2016	0.03208	0.004193	2e-14	+	-	-	-	-	unit increase	NHGRI-EBI_GWAS_Catalog
rs1175550	rs1175550	chr1:3691528	chr1:3774964	G	A	rs70940313	chr1:3691434	chr1:3774870	CGCA	C	1	0.87754	0.9531	Hemoglobin concentration	EFO_0004586	Astle W	27863252	European	2016	0.02998	0.00417	6.562e-13	+	173480	0	173480	2	IVNT	Astle-W_Blood-Cell-Traits_EUR_2016
rs1175550	rs1175550	chr1:3691528	chr1:3774964	G	A	rs70940313	chr1:3691434	chr1:3774870	CGCA	C	1	0.87754	0.9531	High light scatter percentage of red cells	EFO_0004586	Astle W	27863252	European	2016	0.05491	0.004214	8.237e-39	+	173480	0	173480	2	IVNT	Astle-W_Blood-Cell-Traits_EUR_2016
rs1175550	rs1175550	chr1:3691528	chr1:3774964	G	A	rs70940313	chr1:3691434	chr1:3774870	CGCA	C	1	0.87754	0.9531	High light scatter reticulocyte count	EFO_0004586	Astle W	27863252	European	2016	0.05901	0.004214	1.453e-44	+	173480	0	173480	2	IVNT	Astle-W_Blood-Cell-Traits_EUR_2016
rs1175550	rs1175550	chr1:3691528	chr1:3774964	G	A	rs70940313	chr1:3691434	chr1:3774870	CGCA	C	1	0.87754	0.9531	Immature fraction of reticulocytes	EFO_0004586	Astle W	27863252	European	2016	0.04221	0.004175	4.947e-24	+	173480	0	173480	2	IVNT	Astle-W_Blood-Cell-Traits_EUR_2016
rs1175550	rs1175550	chr1:3691528	chr1:3774964	G	A	rs70940313	chr1:3691434	chr1:3774870	CGCA	C	1	0.87754	0.9531	Mean corpuscular hemoglobin concentration	EFO_0004586	Astle W	27863252	European	2016	0.05461	0.004073	5.391e-41	+	173480	0	173480	2	IVNT	Astle-W_Blood-Cell-Traits_EUR_2016
rs1175550	rs1175550	chr1:3691528	chr1:3774964	G	A	rs70940313	chr1:3691434	chr1:3774870	CGCA	C	1	0.87754	0.9531	Mean corpuscular volume	EFO_0004586	Astle W	27863252	European	2016	-0.02948	0.004148	1.181e-12	-	173480	0	173480	2	IVNT	Astle-W_Blood-Cell-Traits_EUR_2016
rs1175550	rs1175550	chr1:3691528	chr1:3774964	G	A	rs70940313	chr1:3691434	chr1:3774870	CGCA	C	1	0.87754	0.9531	Red blood cell count	EFO_0004586	Astle W	27863252	European	2016	0.02831	0.004181	1.271e-11	+	173480	0	173480	2	IVNT	Astle-W_Blood-Cell-Traits_EUR_2016
rs1175550	rs1175550	chr1:3691528	chr1:3774964	G	A	rs70940313	chr1:3691434	chr1:3774870	CGCA	C	1	0.87754	0.9531	Red cell distribution width	EFO_0004586	Astle W	27863252	European	2016	-0.03517	0.004161	2.868e-17	-	173480	0	173480	2	IVNT	Astle-W_Blood-Cell-Traits_EUR_2016
rs1175550	rs1175550	chr1:3691528	chr1:3774964	G	A	rs70940313	chr1:3691434	chr1:3774870	CGCA	C	1	0.87754	0.9531	Reticulocyte count	EFO_0004586	Astle W	27863252	European	2016	0.05468	0.00422	2.102e-38	+	173480	0	173480	2	IVNT	Astle-W_Blood-Cell-Traits_EUR_2016
rs1175550	rs1175550	chr1:3691528	chr1:3774964	G	A	rs70940313	chr1:3691434	chr1:3774870	CGCA	C	1	0.87754	0.9531	Reticulocyte fraction of red cells	EFO_0004586	Astle W	27863252	European	2016	0.0488	0.004217	5.698e-31	+	173480	0	173480	2	IVNT	Astle-W_Blood-Cell-Traits_EUR_2016
rs2769264	rs2769264	chr1:151344741	chr1:151372265	T	G	rs2769264	chr1:151344741	chr1:151372265	T	G	0	1	1	Copper levels	CHEBI_28694	Evans DM	23720494	European	2013	NA	NA	2.63e-20	NA	2603	-	-	-	-	GRASP
rs2769264	rs2769264	chr1:151344741	chr1:151372265	T	G	rs2769264	chr1:151344741	chr1:151372265	T	G	0	1	1	Blood trace element Cu levels	EFO_0005267	Evans DM	23720494	European	2013	-0.313	0.03395	3e-20	-	-	-	-	-	unit increase	NHGRI-EBI_GWAS_Catalog
rs2769264	rs2769264	chr1:151344741	chr1:151372265	T	G	rs2769264	chr1:151344741	chr1:151372265	T	G	0	1	1	Arm fat-free mass left	-	Neale B	UKBB	European	2017	-0.009283	0.001987	2.99e-06	-	331159	0	331159	1	IVNT	Neale-B_UKBB_EUR_2017
rs2769264	rs2769264	chr1:151344741	chr1:151372265	T	G	rs2769264	chr1:151344741	chr1:151372265	T	G	0	1	1	Arm fat-free mass right	-	Neale B	UKBB	European	2017	-0.00953	0.001948	9.913e-07	-	331221	0	331221	1	IVNT	Neale-B_UKBB_EUR_2017
rs2769264	rs2769264	chr1:151344741	chr1:151372265	T	G	rs2769264	chr1:151344741	chr1:151372265	T	G	0	1	1	Arm predicted mass left	-	Neale B	UKBB	European	2017	-0.009344	0.00198	2.359e-06	-	331146	0	331146	1	IVNT	Neale-B_UKBB_EUR_2017
rs2769264	rs2769264	chr1:151344741	chr1:151372265	T	G	rs2769264	chr1:151344741	chr1:151372265	T	G	0	1	1	Arm predicted mass right	-	Neale B	UKBB	European	2017	-0.009386	0.001941	1.322e-06	-	331216	0	331216	1	IVNT	Neale-B_UKBB_EUR_2017
rs2769264	rs2769264	chr1:151344741	chr1:151372265	T	G	rs2769264	chr1:151344741	chr1:151372265	T	G	0	1	1	Basal metabolic rate	EFO_0007777	Neale B	UKBB	European	2017	-0.009377	0.002072	6.053e-06	-	331307	0	331307	1	IVNT	Neale-B_UKBB_EUR_2017
rs2769264	rs2769264	chr1:151344741	chr1:151372265	T	G	rs2769264	chr1:151344741	chr1:151372265	T	G	0	1	1	Body mass index	EFO_0004340	Neale B	UKBB	European	2017	-0.01445	0.003092	2.944e-06	-	336107	0	336107	1	IVNT	Neale-B_UKBB_EUR_2017
rs2769264	rs2769264	chr1:151344741	chr1:151372265	T	G	rs2769264	chr1:151344741	chr1:151372265	T	G	0	1	1	Impedance of arm right	-	Neale B	UKBB	European	2017	0.01133	0.002198	2.551e-07	+	331279	0	331279	1	IVNT	Neale-B_UKBB_EUR_2017
rs2769264	rs2769264	chr1:151344741	chr1:151372265	T	G	rs2769264	chr1:151344741	chr1:151372265	T	G	0	1	1	Impedance of whole body	-	Neale B	UKBB	European	2017	0.01099	0.002383	4.036e-06	+	331284	0	331284	1	IVNT	Neale-B_UKBB_EUR_2017
rs2769264	rs2769264	chr1:151344741	chr1:151372265	T	G	rs2769264	chr1:151344741	chr1:151372265	T	G	0	1	1	Whole body fat-free mass	-	Neale B	UKBB	European	2017	-0.0088	0.001977	8.496e-06	-	331291	0	331291	1	IVNT	Neale-B_UKBB_EUR_2017
rs2769264	rs2769264	chr1:151344741	chr1:151372265	T	G	rs2769264	chr1:151344741	chr1:151372265	T	G	0	1	1	Whole body water mass	-	Neale B	UKBB	European	2017	-0.008881	0.001979	7.236e-06	-	331315	0	331315	1	IVNT	Neale-B_UKBB_EUR_2017
rs2769264	rs2769264	chr1:151344741	chr1:151372265	T	G	rs2769265	chr1:151344150	chr1:151371674	C	A	1	0.98531	1	Arm fat-free mass left	-	Neale B	UKBB	European	2017	-0.008937	0.001992	7.265e-06	-	331159	0	331159	1	IVNT	Neale-B_UKBB_EUR_2017
rs2769264	rs2769264	chr1:151344741	chr1:151372265	T	G	rs2769265	chr1:151344150	chr1:151371674	C	A	1	0.98531	1	Arm fat-free mass right	-	Neale B	UKBB	European	2017	-0.009115	0.001953	3.037e-06	-	331221	0	331221	1	IVNT	Neale-B_UKBB_EUR_2017
rs2769264	rs2769264	chr1:151344741	chr1:151372265	T	G	rs2769265	chr1:151344150	chr1:151371674	C	A	1	0.98531	1	Arm predicted mass left	-	Neale B	UKBB	European	2017	-0.008955	0.001985	6.429e-06	-	331146	0	331146	1	IVNT	Neale-B_UKBB_EUR_2017
rs2769264	rs2769264	chr1:151344741	chr1:151372265	T	G	rs2769265	chr1:151344150	chr1:151371674	C	A	1	0.98531	1	Arm predicted mass right	-	Neale B	UKBB	European	2017	-0.009014	0.001946	3.61e-06	-	331216	0	331216	1	IVNT	Neale-B_UKBB_EUR_2017
rs2769264	rs2769264	chr1:151344741	chr1:151372265	T	G	rs2769265	chr1:151344150	chr1:151371674	C	A	1	0.98531	1	Body mass index	EFO_0004340	Neale B	UKBB	European	2017	-0.01411	0.0031	5.31e-06	-	336107	0	336107	1	IVNT	Neale-B_UKBB_EUR_2017
rs2769264	rs2769264	chr1:151344741	chr1:151372265	T	G	rs2769265	chr1:151344150	chr1:151371674	C	A	1	0.98531	1	Impedance of arm right	-	Neale B	UKBB	European	2017	0.01113	0.002204	4.423e-07	+	331279	0	331279	1	IVNT	Neale-B_UKBB_EUR_2017
rs2769264	rs2769264	chr1:151344741	chr1:151372265	T	G	rs2769265	chr1:151344150	chr1:151371674	C	A	1	0.98531	1	Impedance of whole body	-	Neale B	UKBB	European	2017	0.01073	0.002389	7.051e-06	+	331284	0	331284	1	IVNT	Neale-B_UKBB_EUR_2017
rs2769264	rs2769264	chr1:151344741	chr1:151372265	T	G	rs1752381	chr1:151347311	chr1:151374835	A	T	1	0.96342	1	Arm fat-free mass right	-	Neale B	UKBB	European	2017	-0.008929	0.002018	9.656e-06	-	331221	0	331221	1	IVNT	Neale-B_UKBB_EUR_2017
rs2769264	rs2769264	chr1:151344741	chr1:151372265	T	G	rs1752381	chr1:151347311	chr1:151374835	A	T	1	0.96342	1	Arm predicted mass right	-	Neale B	UKBB	European	2017	-0.008914	0.002011	9.306e-06	-	331216	0	331216	1	IVNT	Neale-B_UKBB_EUR_2017
rs2769264	rs2769264	chr1:151344741	chr1:151372265	T	G	rs1752381	chr1:151347311	chr1:151374835	A	T	1	0.96342	1	Body mass index	EFO_0004340	Neale B	UKBB	European	2017	-0.01447	0.003204	6.289e-06	-	336107	0	336107	1	IVNT	Neale-B_UKBB_EUR_2017
rs2769264	rs2769264	chr1:151344741	chr1:151372265	T	G	rs1752381	chr1:151347311	chr1:151374835	A	T	1	0.96342	1	Impedance of arm right	-	Neale B	UKBB	European	2017	0.01027	0.002278	6.543e-06	+	331279	0	331279	1	IVNT	Neale-B_UKBB_EUR_2017
rs2769264	rs2769264	chr1:151344741	chr1:151372265	T	G	rs6684085	chr1:151357333	chr1:151384857	C	T	1	0.913	0.9698	Arm fat-free mass left	-	Neale B	UKBB	European	2017	-0.008841	0.001942	5.298e-06	-	331159	0	331159	1	IVNT	Neale-B_UKBB_EUR_2017
rs2769264	rs2769264	chr1:151344741	chr1:151372265	T	G	rs6684085	chr1:151357333	chr1:151384857	C	T	1	0.913	0.9698	Arm fat-free mass right	-	Neale B	UKBB	European	2017	-0.00905	0.001903	1.984e-06	-	331221	0	331221	1	IVNT	Neale-B_UKBB_EUR_2017
rs2769264	rs2769264	chr1:151344741	chr1:151372265	T	G	rs6684085	chr1:151357333	chr1:151384857	C	T	1	0.913	0.9698	Arm predicted mass left	-	Neale B	UKBB	European	2017	-0.008916	0.001935	4.048e-06	-	331146	0	331146	1	IVNT	Neale-B_UKBB_EUR_2017
rs2769264	rs2769264	chr1:151344741	chr1:151372265	T	G	rs6684085	chr1:151357333	chr1:151384857	C	T	1	0.913	0.9698	Arm predicted mass right	-	Neale B	UKBB	European	2017	-0.009031	0.001896	1.918e-06	-	331216	0	331216	1	IVNT	Neale-B_UKBB_EUR_2017
rs2769264	rs2769264	chr1:151344741	chr1:151372265	T	G	rs6684085	chr1:151357333	chr1:151384857	C	T	1	0.913	0.9698	Impedance of arm right	-	Neale B	UKBB	European	2017	0.01098	0.002148	3.155e-07	+	331279	0	331279	1	IVNT	Neale-B_UKBB_EUR_2017
rs672413	rs672413	chr5:78278229	chr5:78982406	G	A	rs672413	chr5:78278229	chr5:78982406	G	A	0	1	1	Blood and toenail selenium levels	EFO_0006331	Cornelis MC	25343990	European	2014	NA	NA	5e-14	NA	-	-	-	-	-	NHGRI-EBI_GWAS_Catalog
rs672413	rs672413	chr5:78278229	chr5:78982406	G	A	rs672413	chr5:78278229	chr5:78982406	G	A	0	1	1	Blood protein levels	EFO_0008140	Suhre K	28240269	European	2017	-0.3691	0.04535	4e-16	-	-	-	-	-	unit increase	NHGRI-EBI_GWAS_Catalog
rs705415	rs705415	chr5:78291960	chr5:78996137	T	C	rs705415	chr5:78291960	chr5:78996137	T	C	0	1	1	Blood and toenail selenium levels	EFO_0006331	Cornelis MC	25343990	European	2014	NA	NA	5e-10	NA	-	-	-	-	-	NHGRI-EBI_GWAS_Catalog
rs3797535	rs3797535	chr5:78300397	chr5:79004574	C	T	rs3797535	chr5:78300397	chr5:79004574	C	T	0	1	1	Blood and toenail selenium levels	EFO_0006331	Cornelis MC	25343990	European	2014	NA	NA	2e-15	NA	-	-	-	-	-	NHGRI-EBI_GWAS_Catalog
rs11951068	rs11951068	chr5:78304314	chr5:79008491	A	G	rs11951068	chr5:78304314	chr5:79008491	A	G	0	1	1	Blood and toenail selenium levels	EFO_0006331	Cornelis MC	25343990	European	2014	NA	NA	2e-11	NA	-	-	-	-	-	NHGRI-EBI_GWAS_Catalog
rs921943	rs921943	chr5:78316476	chr5:79020653	T	C	rs921943	chr5:78316476	chr5:79020653	T	C	0	1	1	Selenium levels	CHEBI_27568	Evans DM	23720494	European	2013	NA	NA	9.4e-28	NA	2603	-	-	-	-	GRASP
rs921943	rs921943	chr5:78316476	chr5:79020653	T	C	rs921943	chr5:78316476	chr5:79020653	T	C	0	1	1	Blood and toenail selenium levels	EFO_0006331	Cornelis MC	25343990	European	2014	NA	NA	2e-39	NA	-	-	-	-	-	NHGRI-EBI_GWAS_Catalog
rs921943	rs921943	chr5:78316476	chr5:79020653	T	C	rs921943	chr5:78316476	chr5:79020653	T	C	0	1	1	Blood trace element Se levels	EFO_0005266	Evans DM	23720494	European	2013	0.246	0.02252	9e-28	+	-	-	-	-	unit increase	NHGRI-EBI_GWAS_Catalog
rs921943	rs921943	chr5:78316476	chr5:79020653	T	C	rs921943	chr5:78316476	chr5:79020653	T	C	0	1	1	Comparative height size at age 10	-	Neale B	UKBB	European	2017	0.009185	0.001839	5.891e-07	+	332021	0	332021	1	-	Neale-B_UKBB_EUR_2017
rs921943	rs921943	chr5:78316476	chr5:79020653	T	C	rs921943	chr5:78316476	chr5:79020653	T	C	0	1	1	Height	EFO_0004339	Neale B	UKBB	European	2017	0.01073	0.001914	2.064e-08	+	336474	0	336474	1	IVNT	Neale-B_UKBB_EUR_2017
rs921943	rs921943	chr5:78316476	chr5:79020653	T	C	rs921943	chr5:78316476	chr5:79020653	T	C	0	1	1	Sitting height	EFO_0004339	Neale B	UKBB	European	2017	0.01241	0.002082	2.53e-09	+	336172	0	336172	1	IVNT	Neale-B_UKBB_EUR_2017
rs921943	rs921943	chr5:78316476	chr5:79020653	T	C	rs2034900	chr5:78315964	chr5:79020141	A	G	1	1	1	Comparative height size at age 10	-	Neale B	UKBB	European	2017	0.009133	0.001838	6.757e-07	+	332021	0	332021	1	-	Neale-B_UKBB_EUR_2017
rs921943	rs921943	chr5:78316476	chr5:79020653	T	C	rs2034900	chr5:78315964	chr5:79020141	A	G	1	1	1	Height	EFO_0004339	Neale B	UKBB	European	2017	0.01067	0.001913	2.433e-08	+	336474	0	336474	1	IVNT	Neale-B_UKBB_EUR_2017
rs921943	rs921943	chr5:78316476	chr5:79020653	T	C	rs2034900	chr5:78315964	chr5:79020141	A	G	1	1	1	Sitting height	EFO_0004339	Neale B	UKBB	European	2017	0.01238	0.002081	2.708e-09	+	336172	0	336172	1	IVNT	Neale-B_UKBB_EUR_2017
rs921943	rs921943	chr5:78316476	chr5:79020653	T	C	rs2034899	chr5:78316188	chr5:79020365	G	T	1	1	1	Comparative height size at age 10	-	Neale B	UKBB	European	2017	0.009122	0.001838	6.994e-07	+	332021	0	332021	1	-	Neale-B_UKBB_EUR_2017
rs921943	rs921943	chr5:78316476	chr5:79020653	T	C	rs2034899	chr5:78316188	chr5:79020365	G	T	1	1	1	Height	EFO_0004339	Neale B	UKBB	European	2017	0.01072	0.001914	2.111e-08	+	336474	0	336474	1	IVNT	Neale-B_UKBB_EUR_2017
rs921943	rs921943	chr5:78316476	chr5:79020653	T	C	rs2034899	chr5:78316188	chr5:79020365	G	T	1	1	1	Leg fat-free mass right	-	Neale B	UKBB	European	2017	0.007834	0.001773	9.897e-06	+	331285	0	331285	1	IVNT	Neale-B_UKBB_EUR_2017
rs921943	rs921943	chr5:78316476	chr5:79020653	T	C	rs2034899	chr5:78316188	chr5:79020365	G	T	1	1	1	Leg predicted mass left	-	Neale B	UKBB	European	2017	0.007786	0.001761	9.833e-06	+	331253	0	331253	1	IVNT	Neale-B_UKBB_EUR_2017
rs921943	rs921943	chr5:78316476	chr5:79020653	T	C	rs2034899	chr5:78316188	chr5:79020365	G	T	1	1	1	Sitting height	EFO_0004339	Neale B	UKBB	European	2017	0.01235	0.002082	3.028e-09	+	336172	0	336172	1	IVNT	Neale-B_UKBB_EUR_2017
rs921943	rs921943	chr5:78316476	chr5:79020653	T	C	rs2364143	chr5:78316227	chr5:79020404	C	A	1	1	1	Comparative height size at age 10	-	Neale B	UKBB	European	2017	0.009165	0.001838	6.165e-07	+	332021	0	332021	1	-	Neale-B_UKBB_EUR_2017
rs921943	rs921943	chr5:78316476	chr5:79020653	T	C	rs2364143	chr5:78316227	chr5:79020404	C	A	1	1	1	Height	EFO_0004339	Neale B	UKBB	European	2017	0.01069	0.001913	2.304e-08	+	336474	0	336474	1	IVNT	Neale-B_UKBB_EUR_2017
rs921943	rs921943	chr5:78316476	chr5:79020653	T	C	rs2364143	chr5:78316227	chr5:79020404	C	A	1	1	1	Sitting height	EFO_0004339	Neale B	UKBB	European	2017	0.01237	0.002081	2.76e-09	+	336172	0	336172	1	IVNT	Neale-B_UKBB_EUR_2017
rs921943	rs921943	chr5:78316476	chr5:79020653	T	C	rs731124	chr5:78317413	chr5:79021590	T	C	1	1	1	Comparative height size at age 10	-	Neale B	UKBB	European	2017	0.00916	0.001838	6.277e-07	+	332021	0	332021	1	-	Neale-B_UKBB_EUR_2017
rs921943	rs921943	chr5:78316476	chr5:79020653	T	C	rs731124	chr5:78317413	chr5:79021590	T	C	1	1	1	Height	EFO_0004339	Neale B	UKBB	European	2017	0.01074	0.001913	1.977e-08	+	336474	0	336474	1	IVNT	Neale-B_UKBB_EUR_2017
rs921943	rs921943	chr5:78316476	chr5:79020653	T	C	rs731124	chr5:78317413	chr5:79021590	T	C	1	1	1	Sitting height	EFO_0004339	Neale B	UKBB	European	2017	0.01245	0.002082	2.235e-09	+	336172	0	336172	1	IVNT	Neale-B_UKBB_EUR_2017
rs567754	rs567754	chr5:78416416	chr5:79120593	C	T	rs567754	chr5:78416416	chr5:79120593	C	T	0	1	1	Blood and toenail selenium levels	EFO_0006331	Cornelis MC	25343990	European	2014	NA	NA	8e-20	NA	-	-	-	-	-	NHGRI-EBI_GWAS_Catalog
rs567754	rs567754	chr5:78416416	chr5:79120593	C	T	rs567754	chr5:78416416	chr5:79120593	C	T	0	1	1	Toenail selenium levels	EFO_0006331	Cornelis MC	25343990	European	2014	-0.018	0.003943	5e-06	-	-	-	-	-	unit decrease	NHGRI-EBI_GWAS_Catalog
rs10944	rs10944	chr5:78385845	chr5:79090022	T	G	rs10944	chr5:78385845	chr5:79090022	T	G	0	1	1	Blood and toenail selenium levels	EFO_0006331	Cornelis MC	25343990	European	2014	NA	NA	1e-36	NA	-	-	-	-	-	NHGRI-EBI_GWAS_Catalog
rs10944	rs10944	chr5:78385845	chr5:79090022	T	G	rs10944	chr5:78385845	chr5:79090022	T	G	0	1	1	Sitting height	EFO_0004339	Neale B	UKBB	European	2017	0.008583	0.001876	4.786e-06	+	336172	0	336172	1	IVNT	Neale-B_UKBB_EUR_2017
rs10944	rs10944	chr5:78385845	chr5:79090022	T	G	rs557302	chr5:78377334	chr5:79081511	A	G	1	1	1	Self employment entrepreneurship in females	NCIT_C116000	van der Loos MJ	23593239	European	2013	NA	NA	8.77e-06	NA	50627	-	-	-	-	GRASP
rs10944	rs10944	chr5:78385845	chr5:79090022	T	G	rs557302	chr5:78377334	chr5:79081511	A	G	1	1	1	Sitting height	EFO_0004339	Neale B	UKBB	European	2017	0.00866	0.001876	3.891e-06	+	336172	0	336172	1	IVNT	Neale-B_UKBB_EUR_2017
rs10944	rs10944	chr5:78385845	chr5:79090022	T	G	rs565718	chr5:78382943	chr5:79087120	T	C	1	1	1	Sitting height	EFO_0004339	Neale B	UKBB	European	2017	0.008639	0.001876	4.132e-06	+	336172	0	336172	1	IVNT	Neale-B_UKBB_EUR_2017
rs10944	rs10944	chr5:78385845	chr5:79090022	T	G	rs595653	chr5:78383862	chr5:79088039	G	A	1	1	1	Sitting height	EFO_0004339	Neale B	UKBB	European	2017	0.008664	0.001876	3.88e-06	+	336172	0	336172	1	IVNT	Neale-B_UKBB_EUR_2017
rs10944	rs10944	chr5:78385845	chr5:79090022	T	G	rs584536	chr5:78383989	chr5:79088166	C	T	1	1	1	Sitting height	EFO_0004339	Neale B	UKBB	European	2017	0.008631	0.001876	4.22e-06	+	336172	0	336172	1	IVNT	Neale-B_UKBB_EUR_2017
rs558133	rs558133	chr5:78425188	chr5:79129365	C	A	rs558133	chr5:78425188	chr5:79129365	C	A	0	1	1	Blood and toenail selenium levels	EFO_0006331	Cornelis MC	25343990	European	2014	NA	NA	6e-11	NA	-	-	-	-	-	NHGRI-EBI_GWAS_Catalog
rs6859667	rs6859667	chr5:78745042	chr5:79449219	C	T	rs6859667	chr5:78745042	chr5:79449219	C	T	0	1	1	Blood and toenail selenium levels	EFO_0006331	Cornelis MC	25343990	European	2014	NA	NA	4e-12	NA	-	-	-	-	-	NHGRI-EBI_GWAS_Catalog
rs6859667	rs6859667	chr5:78745042	chr5:79449219	C	T	rs6859667	chr5:78745042	chr5:79449219	C	T	0	1	1	Toenail selenium levels	EFO_0006331	Cornelis MC	25343990	European	2014	-0.045	0.008448	1e-07	-	-	-	-	-	unit decrease	NHGRI-EBI_GWAS_Catalog
rs6859667	rs6859667	chr5:78745042	chr5:79449219	C	T	rs6859667	chr5:78745042	chr5:79449219	C	T	0	1	1	Rash and other nonspecific skin eruption	EFO_0000701	Neale B	UKBB	European	2017	0.000716	0.0001586	6.347e-06	+	337199	224	336975	1	risk diff	Neale-B_UKBB_EUR_2017
rs6859667	rs6859667	chr5:78745042	chr5:79449219	C	T	rs57783254	chr5:78726228	chr5:79430405	G	C	1	1	1	Rash and other nonspecific skin eruption	EFO_0000701	Neale B	UKBB	European	2017	0.0007129	0.0001585	6.855e-06	+	337199	224	336975	1	risk diff	Neale-B_UKBB_EUR_2017
rs6859667	rs6859667	chr5:78745042	chr5:79449219	C	T	rs35944172	chr5:78752802	chr5:79456979	C	T	1	0.97676	1	Rash and other nonspecific skin eruption	EFO_0000701	Neale B	UKBB	European	2017	0.0007143	0.0001585	6.578e-06	+	337199	224	336975	1	risk diff	Neale-B_UKBB_EUR_2017
rs6859667	rs6859667	chr5:78745042	chr5:79449219	C	T	rs73122358	chr5:78753165	chr5:79457342	G	C	1	0.97676	1	Rash and other nonspecific skin eruption	EFO_0000701	Neale B	UKBB	European	2017	0.0007143	0.0001585	6.582e-06	+	337199	224	336975	1	risk diff	Neale-B_UKBB_EUR_2017
rs6586282	rs6586282	chr21:44478497	chr21:43058387	C	T	rs6586282	chr21:44478497	chr21:43058387	C	T	0	1	1	Homocysteine levels	EFO_0004578	Lange LA	20154341	Filipino	2010	NA	NA	3.2e-10	NA	1786	-	-	-	-	GRASP
rs6586282	rs6586282	chr21:44478497	chr21:43058387	C	T	rs6586282	chr21:44478497	chr21:43058387	C	T	0	1	1	Plasma homocysteine	-	Pare G	20031578	European	2009	NA	NA	3.2e-10	NA	13974	-	-	-	-	GRASP
rs6586282	rs6586282	chr21:44478497	chr21:43058387	C	T	rs6586282	chr21:44478497	chr21:43058387	C	T	0	1	1	Selenium levels	CHEBI_27568	Evans DM	23720494	European	2013	NA	NA	4.58e-06	NA	2603	-	-	-	-	GRASP
rs6586282	rs6586282	chr21:44478497	chr21:43058387	C	T	rs6586282	chr21:44478497	chr21:43058387	C	T	0	1	1	Blood and toenail selenium levels	EFO_0006331	Cornelis MC	25343990	European	2014	NA	NA	4e-09	NA	-	-	-	-	-	NHGRI-EBI_GWAS_Catalog
rs6586282	rs6586282	chr21:44478497	chr21:43058387	C	T	rs6586282	chr21:44478497	chr21:43058387	C	T	0	1	1	Blood trace element Se levels	EFO_0005266	Evans DM	23720494	European	2013	NA	NA	5e-06	NA	-	-	-	-	-	NHGRI-EBI_GWAS_Catalog
rs6586282	rs6586282	chr21:44478497	chr21:43058387	C	T	rs6586282	chr21:44478497	chr21:43058387	C	T	0	1	1	Homocysteine levels	EFO_0004578	Pare G	20031578	European	2009	NA	NA	3e-10	NA	-	-	-	-	-	NHGRI-EBI_GWAS_Catalog
rs6586282	rs6586282	chr21:44478497	chr21:43058387	C	T	rs6586282	chr21:44478497	chr21:43058387	C	T	0	1	1	Homocysteine	CHEBI_17230;NCIT_C105949	Pare G	20031578	European	2009	NA	NA	3e-10	NA	-	-	-	-	-	dbGaP
rs1789953	rs1789953	chr21:44482936	chr21:43062826	C	T	rs1789953	chr21:44482936	chr21:43062826	C	T	0	1	1	Blood and toenail selenium levels	EFO_0006331	Cornelis MC	25343990	European	2014	NA	NA	3e-08	NA	-	-	-	-	-	NHGRI-EBI_GWAS_Catalog
rs234709	rs234709	chr21:44486964	chr21:43066854	C	T	rs234709	chr21:44486964	chr21:43066854	C	T	0	1	1	Blood and toenail selenium levels	EFO_0006331	Cornelis MC	25343990	European	2014	NA	NA	5e-09	NA	-	-	-	-	-	NHGRI-EBI_GWAS_Catalog
rs234709	rs234709	chr21:44486964	chr21:43066854	C	T	rs234709	chr21:44486964	chr21:43066854	C	T	0	1	1	Homocysteine levels	EFO_0004578	van Meurs JB	23824729	European	2013	-0.0718	0.007087	4e-24	-	-	-	-	-	unit decrease	NHGRI-EBI_GWAS_Catalog
rs17498581	rs17498581	chr1:83220434	chr1:82754751	C	T	rs17498581	chr1:83220434	chr1:82754751	C	T	0	1	1	Toenail selenium levels	EFO_0006331	Cornelis MC	25343990	European	2014	-0.024	0.005406	9e-06	-	-	-	-	-	unit increase	NHGRI-EBI_GWAS_Catalog
rs2802728	rs2802728	chr1:243518151	chr1:243354849	C	T	rs2802728	chr1:243518151	chr1:243354849	C	T	0	1	1	Toenail selenium levels	EFO_0006331	Cornelis MC	25343990	European	2014	-0.026	0.005744	6e-06	-	-	-	-	-	unit increase	NHGRI-EBI_GWAS_Catalog
rs352889	rs352889	chr2:143759691	chr2:143002122	A	G	rs352889	chr2:143759691	chr2:143002122	A	G	0	1	1	Lymphocyte count	EFO_0004586	Astle W	27863252	European	2016	0.01768	0.003738	2.236e-06	+	173480	0	173480	2	IVNT	Astle-W_Blood-Cell-Traits_EUR_2016
rs352889	rs352889	chr2:143759691	chr2:143002122	A	G	rs352889	chr2:143759691	chr2:143002122	A	G	0	1	1	Toenail selenium levels	EFO_0006331	Cornelis MC	25343990	European	2014	0.016	0.00347	4e-06	+	-	-	-	-	unit increase	NHGRI-EBI_GWAS_Catalog
rs352889	rs352889	chr2:143759691	chr2:143002122	A	G	rs352892	chr2:143757925	chr2:143000356	A	C	1	1	1	Lymphocyte count	EFO_0004586	Astle W	27863252	European	2016	0.01775	0.003737	2.044e-06	+	173480	0	173480	2	IVNT	Astle-W_Blood-Cell-Traits_EUR_2016
rs7702905	rs7702905	chr5:2788906	chr5:2788792	A	G	rs7702905	chr5:2788906	chr5:2788792	A	G	0	1	1	Toenail selenium levels	EFO_0006331	Cornelis MC	25343990	European	2014	0.017	0.003807	8e-06	+	-	-	-	-	unit decrease	NHGRI-EBI_GWAS_Catalog
rs248381	rs248381	chr5:78337225	chr5:79041402	A	G	rs248381	chr5:78337225	chr5:79041402	A	G	0	1	1	Toenail selenium levels	EFO_0006331	Cornelis MC	25343990	European	2014	0.025	0.003427	3e-13	+	-	-	-	-	unit decrease	NHGRI-EBI_GWAS_Catalog
rs248381	rs248381	chr5:78337225	chr5:79041402	A	G	rs248380	chr5:78331741	chr5:79035918	C	T	1	0.99208	1	Sitting height	EFO_0004339	Neale B	UKBB	European	2017	-0.008348	0.001876	8.62e-06	-	336172	0	336172	1	IVNT	Neale-B_UKBB_EUR_2017
rs248381	rs248381	chr5:78337225	chr5:79041402	A	G	rs185077	chr5:78331823	chr5:79036000	C	T	1	0.99208	1	Sitting height	EFO_0004339	Neale B	UKBB	European	2017	-0.008324	0.001876	9.1e-06	-	336172	0	336172	1	IVNT	Neale-B_UKBB_EUR_2017
rs17823744	rs17823744	chr5:78344976	chr5:79049153	A	G	rs17823744	chr5:78344976	chr5:79049153	A	G	0	1	1	Toenail selenium levels	EFO_0006331	Cornelis MC	25343990	European	2014	0.045	0.005419	1e-16	+	-	-	-	-	unit decrease	NHGRI-EBI_GWAS_Catalog
rs17823744	rs17823744	chr5:78344976	chr5:79049153	A	G	rs17823744	chr5:78344976	chr5:79049153	A	G	0	1	1	Height	EFO_0004339	Neale B	UKBB	European	2017	-0.01275	0.002571	7.08e-07	-	336474	0	336474	1	IVNT	Neale-B_UKBB_EUR_2017
rs17823744	rs17823744	chr5:78344976	chr5:79049153	A	G	rs17823744	chr5:78344976	chr5:79049153	A	G	0	1	1	Sitting height	EFO_0004339	Neale B	UKBB	European	2017	-0.01517	0.002797	5.84e-08	-	336172	0	336172	1	IVNT	Neale-B_UKBB_EUR_2017
rs7700970	rs7700970	chr5:78411324	chr5:79115501	C	T	rs7700970	chr5:78411324	chr5:79115501	C	T	0	1	1	Selenium levels	CHEBI_27568	Evans DM	23720494	European	2013	NA	NA	1.72e-18	NA	2603	-	-	-	-	GRASP
rs7700970	rs7700970	chr5:78411324	chr5:79115501	C	T	rs7700970	chr5:78411324	chr5:79115501	C	T	0	1	1	Toenail selenium levels	EFO_0006331	Cornelis MC	25343990	European	2014	-0.03	0.004474	2e-11	-	-	-	-	-	unit increase	NHGRI-EBI_GWAS_Catalog
rs10079417	rs10079417	chr5:79143194	chr5:79847371	C	T	rs10079417	chr5:79143194	chr5:79847371	C	T	0	1	1	Toenail selenium levels	EFO_0006331	Cornelis MC	25343990	European	2014	-0.018	0.003977	6e-06	-	-	-	-	-	unit increase	NHGRI-EBI_GWAS_Catalog
rs756699	rs756699	chr5:133446575	chr5:134110884	C	T	rs756699	chr5:133446575	chr5:134110884	C	T	0	1	1	Multiple sclerosis	EFO_0003885	Sawcer S	21833088	European	2011	NA	NA	6.2e-07	NA	27148	-	-	-	-	GRASP
rs756699	rs756699	chr5:133446575	chr5:134110884	C	T	rs756699	chr5:133446575	chr5:134110884	C	T	0	1	1	Multiple sclerosis	EFO_0003885	Sawcer S	21833088	European	2011	NA	NA	6e-07	NA	-	-	-	-	-	NHGRI-EBI_GWAS_Catalog
rs756699	rs756699	chr5:133446575	chr5:134110884	C	T	rs756699	chr5:133446575	chr5:134110884	C	T	0	1	1	Self-reported hypothyroidism or myxoedema	EFO_0004705;EFO_1001055	Neale B	UKBB	European	2017	0.004217	0.0007803	6.516e-08	+	337159	16376	320783	1	risk diff	Neale-B_UKBB_EUR_2017
rs756699	rs756699	chr5:133446575	chr5:134110884	C	T	rs168649	chr5:133444920	chr5:134109229	A	G	1	0.99237	1	Self-reported hypothyroidism or myxoedema	EFO_0004705;EFO_1001055	Neale B	UKBB	European	2017	0.004188	0.0007811	8.268e-08	+	337159	16376	320783	1	risk diff	Neale-B_UKBB_EUR_2017
rs756699	rs756699	chr5:133446575	chr5:134110884	C	T	rs244949	chr5:133445298	chr5:134109607	T	C	1	0.99237	1	Self-reported hypothyroidism or myxoedema	EFO_0004705;EFO_1001055	Neale B	UKBB	European	2017	0.004203	0.0007811	7.387e-08	+	337159	16376	320783	1	risk diff	Neale-B_UKBB_EUR_2017
rs756699	rs756699	chr5:133446575	chr5:134110884	C	T	rs244950	chr5:133445628	chr5:134109937	C	T	1	0.99237	1	Self-reported hypothyroidism or myxoedema	EFO_0004705;EFO_1001055	Neale B	UKBB	European	2017	0.004209	0.0007809	7.082e-08	+	337159	16376	320783	1	risk diff	Neale-B_UKBB_EUR_2017
rs17685410	rs17685410	chr8:2113776	chr8:2165853	A	G	rs17685410	chr8:2113776	chr8:2165853	A	G	0	1	1	Toenail selenium levels	EFO_0006331	Cornelis MC	25343990	European	2014	0.018	0.003787	2e-06	+	-	-	-	-	unit increase	NHGRI-EBI_GWAS_Catalog
rs313426	rs313426	chr11:103209984	chr11:103339256	G	A	rs313426	chr11:103209984	chr11:103339256	G	A	0	1	1	Toenail selenium levels	EFO_0006331	Cornelis MC	25343990	European	2014	-0.018	0.003787	2e-06	-	-	-	-	-	unit decrease	NHGRI-EBI_GWAS_Catalog
rs1596370	rs1596370	chr12:54275266	chr12:53881482	A	G	rs1596370	chr12:54275266	chr12:53881482	A	G	0	1	1	Toenail selenium levels	EFO_0006331	Cornelis MC	25343990	European	2014	0.021	0.004255	8e-07	+	-	-	-	-	unit decrease	NHGRI-EBI_GWAS_Catalog
rs2120019	rs2120019	chr15:75334184	chr15:75041843	C	T	rs2120019	chr15:75334184	chr15:75041843	C	T	0	1	1	Mean corpuscular hemoglobin concentration	EFO_0004586	Astle W	27863252	European	2016	0.0228	0.004386	2.011e-07	+	173480	0	173480	2	IVNT	Astle-W_Blood-Cell-Traits_EUR_2016
rs2120019	rs2120019	chr15:75334184	chr15:75041843	C	T	rs2120019	chr15:75334184	chr15:75041843	C	T	0	1	1	Mean corpuscular volume	EFO_0004586	Astle W	27863252	European	2016	-0.02818	0.004473	2.988e-10	-	173480	0	173480	2	IVNT	Astle-W_Blood-Cell-Traits_EUR_2016
rs2120019	rs2120019	chr15:75334184	chr15:75041843	C	T	rs2120019	chr15:75334184	chr15:75041843	C	T	0	1	1	White blood cell count	EFO_0004586	Astle W	27863252	European	2016	-0.02009	0.004541	9.709e-06	-	173480	0	173480	2	IVNT	Astle-W_Blood-Cell-Traits_EUR_2016
rs2120019	rs2120019	chr15:75334184	chr15:75041843	C	T	rs2120019	chr15:75334184	chr15:75041843	C	T	0	1	1	Mean corpuscular volume	EFO_0004526	van der Harst P	23222517	Mixed	2012	NA	NA	2.1e-07	NA	71861	-	-	-	-	GRASP
rs2120019	rs2120019	chr15:75334184	chr15:75041843	C	T	rs2120019	chr15:75334184	chr15:75041843	C	T	0	1	1	Zinc levels	-	Evans DM	23720494	European	2013	NA	NA	1.55e-18	NA	2603	-	-	-	-	GRASP
rs2120019	rs2120019	chr15:75334184	chr15:75041843	C	T	rs2120019	chr15:75334184	chr15:75041843	C	T	0	1	1	Blood trace element Zn levels	EFO_0005268	Evans DM	23720494	European	2013	0.287	0.03277	2e-18	+	-	-	-	-	unit decrease	NHGRI-EBI_GWAS_Catalog
rs2120019	rs2120019	chr15:75334184	chr15:75041843	C	T	rs2120019	chr15:75334184	chr15:75041843	C	T	0	1	1	Treatment with amitriptyline	EFO_0007056	Neale B	UKBB	European	2017	-0.001957	0.0004244	3.979e-06	-	337159	6403	330756	1	risk diff	Neale-B_UKBB_EUR_2017
rs2120019	rs2120019	chr15:75334184	chr15:75041843	C	T	rs34835684	chr15:75331805	chr15:75039464	G	T	1	1	1	Mean corpuscular hemoglobin concentration	EFO_0004586	Astle W	27863252	European	2016	0.0227	0.004385	2.253e-07	+	173480	0	173480	2	IVNT	Astle-W_Blood-Cell-Traits_EUR_2016
rs2120019	rs2120019	chr15:75334184	chr15:75041843	C	T	rs34835684	chr15:75331805	chr15:75039464	G	T	1	1	1	Mean corpuscular volume	EFO_0004586	Astle W	27863252	European	2016	-0.02803	0.004473	3.664e-10	-	173480	0	173480	2	IVNT	Astle-W_Blood-Cell-Traits_EUR_2016
rs2120019	rs2120019	chr15:75334184	chr15:75041843	C	T	rs34835684	chr15:75331805	chr15:75039464	G	T	1	1	1	White blood cell count	EFO_0004586	Astle W	27863252	European	2016	-0.02016	0.00454	9.017e-06	-	173480	0	173480	2	IVNT	Astle-W_Blood-Cell-Traits_EUR_2016
rs2120019	rs2120019	chr15:75334184	chr15:75041843	C	T	rs34835684	chr15:75331805	chr15:75039464	G	T	1	1	1	Treatment with amitriptyline	EFO_0007056	Neale B	UKBB	European	2017	-0.001967	0.0004243	3.54e-06	-	337159	6403	330756	1	risk diff	Neale-B_UKBB_EUR_2017
rs2120019	rs2120019	chr15:75334184	chr15:75041843	C	T	rs35736167	chr15:75332002	chr15:75039661	G	T	1	1	1	Mean corpuscular hemoglobin concentration	EFO_0004586	Astle W	27863252	European	2016	0.02269	0.004386	2.31e-07	+	173480	0	173480	2	IVNT	Astle-W_Blood-Cell-Traits_EUR_2016
rs2120019	rs2120019	chr15:75334184	chr15:75041843	C	T	rs35736167	chr15:75332002	chr15:75039661	G	T	1	1	1	Mean corpuscular volume	EFO_0004586	Astle W	27863252	European	2016	-0.02812	0.004474	3.279e-10	-	173480	0	173480	2	IVNT	Astle-W_Blood-Cell-Traits_EUR_2016
rs2120019	rs2120019	chr15:75334184	chr15:75041843	C	T	rs35736167	chr15:75332002	chr15:75039661	G	T	1	1	1	White blood cell count	EFO_0004586	Astle W	27863252	European	2016	-0.02014	0.004541	9.189e-06	-	173480	0	173480	2	IVNT	Astle-W_Blood-Cell-Traits_EUR_2016
rs2120019	rs2120019	chr15:75334184	chr15:75041843	C	T	rs35736167	chr15:75332002	chr15:75039661	G	T	1	1	1	Treatment with amitriptyline	EFO_0007056	Neale B	UKBB	European	2017	-0.001966	0.0004244	3.615e-06	-	337159	6403	330756	1	risk diff	Neale-B_UKBB_EUR_2017
rs2120019	rs2120019	chr15:75334184	chr15:75041843	C	T	rs2415255	chr15:75332412	chr15:75040071	G	A	1	1	1	Mean corpuscular hemoglobin concentration	EFO_0004586	Astle W	27863252	European	2016	0.02272	0.004387	2.218e-07	+	173480	0	173480	2	IVNT	Astle-W_Blood-Cell-Traits_EUR_2016
rs2120019	rs2120019	chr15:75334184	chr15:75041843	C	T	rs2415255	chr15:75332412	chr15:75040071	G	A	1	1	1	Mean corpuscular volume	EFO_0004586	Astle W	27863252	European	2016	-0.02816	0.004474	3.11e-10	-	173480	0	173480	2	IVNT	Astle-W_Blood-Cell-Traits_EUR_2016
rs2120019	rs2120019	chr15:75334184	chr15:75041843	C	T	rs2415255	chr15:75332412	chr15:75040071	G	A	1	1	1	White blood cell count	EFO_0004586	Astle W	27863252	European	2016	-0.02018	0.004541	8.832e-06	-	173480	0	173480	2	IVNT	Astle-W_Blood-Cell-Traits_EUR_2016
rs2120019	rs2120019	chr15:75334184	chr15:75041843	C	T	rs2415255	chr15:75332412	chr15:75040071	G	A	1	1	1	Treatment with amitriptyline	EFO_0007056	Neale B	UKBB	European	2017	-0.001966	0.0004244	3.595e-06	-	337159	6403	330756	1	risk diff	Neale-B_UKBB_EUR_2017
rs2120019	rs2120019	chr15:75334184	chr15:75041843	C	T	rs2415254	chr15:75332485	chr15:75040144	G	A	1	1	1	Mean corpuscular hemoglobin concentration	EFO_0004586	Astle W	27863252	European	2016	0.02276	0.004389	2.156e-07	+	173480	0	173480	2	IVNT	Astle-W_Blood-Cell-Traits_EUR_2016
rs2120019	rs2120019	chr15:75334184	chr15:75041843	C	T	rs2415254	chr15:75332485	chr15:75040144	G	A	1	1	1	Mean corpuscular volume	EFO_0004586	Astle W	27863252	European	2016	-0.02832	0.004476	2.49e-10	-	173480	0	173480	2	IVNT	Astle-W_Blood-Cell-Traits_EUR_2016
rs2120019	rs2120019	chr15:75334184	chr15:75041843	C	T	rs2415254	chr15:75332485	chr15:75040144	G	A	1	1	1	White blood cell count	EFO_0004586	Astle W	27863252	European	2016	-0.02016	0.004544	9.162e-06	-	173480	0	173480	2	IVNT	Astle-W_Blood-Cell-Traits_EUR_2016
rs2120019	rs2120019	chr15:75334184	chr15:75041843	C	T	rs2415254	chr15:75332485	chr15:75040144	G	A	1	1	1	Treatment with amitriptyline	EFO_0007056	Neale B	UKBB	European	2017	-0.001966	0.0004244	3.595e-06	-	337159	6403	330756	1	risk diff	Neale-B_UKBB_EUR_2017
rs1532423	rs1532423	chr8:86268313	chr8:85356084	G	A	rs1532423	chr8:86268313	chr8:85356084	G	A	0	1	1	High light scatter percentage of red cells	EFO_0004586	Astle W	27863252	European	2016	0.02297	0.003614	2.057e-10	+	173480	0	173480	2	IVNT	Astle-W_Blood-Cell-Traits_EUR_2016
rs1532423	rs1532423	chr8:86268313	chr8:85356084	G	A	rs1532423	chr8:86268313	chr8:85356084	G	A	0	1	1	High light scatter reticulocyte count	EFO_0004586	Astle W	27863252	European	2016	0.02363	0.003614	6.269e-11	+	173480	0	173480	2	IVNT	Astle-W_Blood-Cell-Traits_EUR_2016
rs1532423	rs1532423	chr8:86268313	chr8:85356084	G	A	rs1532423	chr8:86268313	chr8:85356084	G	A	0	1	1	Immature fraction of reticulocytes	EFO_0004586	Astle W	27863252	European	2016	0.01599	0.003579	7.842e-06	+	173480	0	173480	2	IVNT	Astle-W_Blood-Cell-Traits_EUR_2016
rs1532423	rs1532423	chr8:86268313	chr8:85356084	G	A	rs1532423	chr8:86268313	chr8:85356084	G	A	0	1	1	Mean corpuscular hemoglobin concentration	EFO_0004586	Astle W	27863252	European	2016	0.01957	0.00349	2.045e-08	+	173480	0	173480	2	IVNT	Astle-W_Blood-Cell-Traits_EUR_2016
rs1532423	rs1532423	chr8:86268313	chr8:85356084	G	A	rs1532423	chr8:86268313	chr8:85356084	G	A	0	1	1	Reticulocyte count	EFO_0004586	Astle W	27863252	European	2016	0.02292	0.00362	2.434e-10	+	173480	0	173480	2	IVNT	Astle-W_Blood-Cell-Traits_EUR_2016
rs1532423	rs1532423	chr8:86268313	chr8:85356084	G	A	rs1532423	chr8:86268313	chr8:85356084	G	A	0	1	1	Reticulocyte fraction of red cells	EFO_0004586	Astle W	27863252	European	2016	0.02213	0.003618	9.526e-10	+	173480	0	173480	2	IVNT	Astle-W_Blood-Cell-Traits_EUR_2016
rs1532423	rs1532423	chr8:86268313	chr8:85356084	G	A	rs1532423	chr8:86268313	chr8:85356084	G	A	0	1	1	Zinc levels	-	Evans DM	23720494	European	2013	NA	NA	6.4e-12	NA	2603	-	-	-	-	GRASP
rs1532423	rs1532423	chr8:86268313	chr8:85356084	G	A	rs1532423	chr8:86268313	chr8:85356084	G	A	0	1	1	Blood trace element Zn levels	EFO_0005268	Evans DM	23720494	European	2013	-0.178	0.02587	6e-12	-	-	-	-	-	unit increase	NHGRI-EBI_GWAS_Catalog
rs1532423	rs1532423	chr8:86268313	chr8:85356084	G	A	rs1532423	chr8:86268313	chr8:85356084	G	A	0	1	1	Reticulocyte fraction of red cells	EFO_0007986	Astle W	27863252	European	2016	0.02213	0.003622	1e-09	+	-	-	-	-	unit increase	NHGRI-EBI_GWAS_Catalog
rs1532423	rs1532423	chr8:86268313	chr8:85356084	G	A	rs6997458	chr8:86274030	chr8:85361801	G	T	1	0.99574	1	High light scatter percentage of red cells	EFO_0004586	Astle W	27863252	European	2016	0.02303	0.003616	1.883e-10	+	173480	0	173480	2	IVNT	Astle-W_Blood-Cell-Traits_EUR_2016
rs1532423	rs1532423	chr8:86268313	chr8:85356084	G	A	rs6997458	chr8:86274030	chr8:85361801	G	T	1	0.99574	1	High light scatter reticulocyte count	EFO_0004586	Astle W	27863252	European	2016	0.02372	0.003616	5.354e-11	+	173480	0	173480	2	IVNT	Astle-W_Blood-Cell-Traits_EUR_2016
rs1532423	rs1532423	chr8:86268313	chr8:85356084	G	A	rs6997458	chr8:86274030	chr8:85361801	G	T	1	0.99574	1	Immature fraction of reticulocytes	EFO_0004586	Astle W	27863252	European	2016	0.01612	0.00358	6.682e-06	+	173480	0	173480	2	IVNT	Astle-W_Blood-Cell-Traits_EUR_2016
rs1532423	rs1532423	chr8:86268313	chr8:85356084	G	A	rs6997458	chr8:86274030	chr8:85361801	G	T	1	0.99574	1	Mean corpuscular hemoglobin concentration	EFO_0004586	Astle W	27863252	European	2016	0.01952	0.003491	2.254e-08	+	173480	0	173480	2	IVNT	Astle-W_Blood-Cell-Traits_EUR_2016
rs1532423	rs1532423	chr8:86268313	chr8:85356084	G	A	rs6997458	chr8:86274030	chr8:85361801	G	T	1	0.99574	1	Reticulocyte count	EFO_0004586	Astle W	27863252	European	2016	0.02296	0.003621	2.312e-10	+	173480	0	173480	2	IVNT	Astle-W_Blood-Cell-Traits_EUR_2016
rs1532423	rs1532423	chr8:86268313	chr8:85356084	G	A	rs6997458	chr8:86274030	chr8:85361801	G	T	1	0.99574	1	Reticulocyte fraction of red cells	EFO_0004586	Astle W	27863252	European	2016	0.02211	0.003619	1.006e-09	+	173480	0	173480	2	IVNT	Astle-W_Blood-Cell-Traits_EUR_2016
rs1532423	rs1532423	chr8:86268313	chr8:85356084	G	A	rs6997458	chr8:86274030	chr8:85361801	G	T	1	0.99574	1	High light scatter reticulocyte count	EFO_0007986	Astle W	27863252	European	2016	0.02372	0.00361	5e-11	+	-	-	-	-	unit increase	NHGRI-EBI_GWAS_Catalog
rs1532423	rs1532423	chr8:86268313	chr8:85356084	G	A	rs6997458	chr8:86274030	chr8:85361801	G	T	1	0.99574	1	High light scatter reticulocyte percentage of red cells	EFO_0007986	Astle W	27863252	European	2016	0.02303	0.003621	2e-10	+	-	-	-	-	unit increase	NHGRI-EBI_GWAS_Catalog
rs1532423	rs1532423	chr8:86268313	chr8:85356084	G	A	rs6997458	chr8:86274030	chr8:85361801	G	T	1	0.99574	1	Reticulocyte count	EFO_0007986	Astle W	27863252	European	2016	0.02296	0.003609	2e-10	+	-	-	-	-	unit increase	NHGRI-EBI_GWAS_Catalog
rs1532423	rs1532423	chr8:86268313	chr8:85356084	G	A	rs13273654	chr8:86286557	chr8:85374328	G	A	1	0.96218	1	High light scatter percentage of red cells	EFO_0004586	Astle W	27863252	European	2016	0.02263	0.003622	4.195e-10	+	173480	0	173480	2	IVNT	Astle-W_Blood-Cell-Traits_EUR_2016
rs1532423	rs1532423	chr8:86268313	chr8:85356084	G	A	rs13273654	chr8:86286557	chr8:85374328	G	A	1	0.96218	1	High light scatter reticulocyte count	EFO_0004586	Astle W	27863252	European	2016	0.02327	0.003622	1.327e-10	+	173480	0	173480	2	IVNT	Astle-W_Blood-Cell-Traits_EUR_2016
rs1532423	rs1532423	chr8:86268313	chr8:85356084	G	A	rs13273654	chr8:86286557	chr8:85374328	G	A	1	0.96218	1	Mean corpuscular hemoglobin concentration	EFO_0004586	Astle W	27863252	European	2016	0.02023	0.003498	7.348e-09	+	173480	0	173480	2	IVNT	Astle-W_Blood-Cell-Traits_EUR_2016
rs1532423	rs1532423	chr8:86268313	chr8:85356084	G	A	rs13273654	chr8:86286557	chr8:85374328	G	A	1	0.96218	1	Reticulocyte count	EFO_0004586	Astle W	27863252	European	2016	0.02278	0.003628	3.39e-10	+	173480	0	173480	2	IVNT	Astle-W_Blood-Cell-Traits_EUR_2016
rs1532423	rs1532423	chr8:86268313	chr8:85356084	G	A	rs13273654	chr8:86286557	chr8:85374328	G	A	1	0.96218	1	Reticulocyte fraction of red cells	EFO_0004586	Astle W	27863252	European	2016	0.02203	0.003626	1.237e-09	+	173480	0	173480	2	IVNT	Astle-W_Blood-Cell-Traits_EUR_2016
rs1532423	rs1532423	chr8:86268313	chr8:85356084	G	A	rs7000950	chr8:86307463	chr8:85395234	A	T	1	0.93708	0.98263	High light scatter percentage of red cells	EFO_0004586	Astle W	27863252	European	2016	0.02235	0.003643	8.469e-10	+	173480	0	173480	2	IVNT	Astle-W_Blood-Cell-Traits_EUR_2016
rs1532423	rs1532423	chr8:86268313	chr8:85356084	G	A	rs7000950	chr8:86307463	chr8:85395234	A	T	1	0.93708	0.98263	High light scatter reticulocyte count	EFO_0004586	Astle W	27863252	European	2016	0.02309	0.003643	2.315e-10	+	173480	0	173480	2	IVNT	Astle-W_Blood-Cell-Traits_EUR_2016
rs1532423	rs1532423	chr8:86268313	chr8:85356084	G	A	rs7000950	chr8:86307463	chr8:85395234	A	T	1	0.93708	0.98263	Immature fraction of reticulocytes	EFO_0004586	Astle W	27863252	European	2016	0.01636	0.003608	5.74e-06	+	173480	0	173480	2	IVNT	Astle-W_Blood-Cell-Traits_EUR_2016
rs1532423	rs1532423	chr8:86268313	chr8:85356084	G	A	rs7000950	chr8:86307463	chr8:85395234	A	T	1	0.93708	0.98263	Mean corpuscular hemoglobin concentration	EFO_0004586	Astle W	27863252	European	2016	0.01935	0.003518	3.794e-08	+	173480	0	173480	2	IVNT	Astle-W_Blood-Cell-Traits_EUR_2016
rs1532423	rs1532423	chr8:86268313	chr8:85356084	G	A	rs7000950	chr8:86307463	chr8:85395234	A	T	1	0.93708	0.98263	Reticulocyte count	EFO_0004586	Astle W	27863252	European	2016	0.0222	0.003649	1.177e-09	+	173480	0	173480	2	IVNT	Astle-W_Blood-Cell-Traits_EUR_2016
rs1532423	rs1532423	chr8:86268313	chr8:85356084	G	A	rs7000950	chr8:86307463	chr8:85395234	A	T	1	0.93708	0.98263	Reticulocyte fraction of red cells	EFO_0004586	Astle W	27863252	European	2016	0.02134	0.003647	4.865e-09	+	173480	0	173480	2	IVNT	Astle-W_Blood-Cell-Traits_EUR_2016
rs964184	rs964184	chr11:116648917	chr11:116778201	C	G	rs964184	chr11:116648917	chr11:116778201	C	G	0	1	1	Eosinophil count	EFO_0004586	Astle W	27863252	European	2016	0.03209	0.005237	8.88e-10	+	173480	0	173480	2	IVNT	Astle-W_Blood-Cell-Traits_EUR_2016
rs964184	rs964184	chr11:116648917	chr11:116778201	C	G	rs964184	chr11:116648917	chr11:116778201	C	G	0	1	1	Eosinophil percentage of granulocytes	EFO_0004586	Astle W	27863252	European	2016	0.02831	0.005254	7.105e-08	+	173480	0	173480	2	IVNT	Astle-W_Blood-Cell-Traits_EUR_2016
rs964184	rs964184	chr11:116648917	chr11:116778201	C	G	rs964184	chr11:116648917	chr11:116778201	C	G	0	1	1	Eosinophil percentage of white cells	EFO_0004586	Astle W	27863252	European	2016	0.02857	0.005231	4.724e-08	+	173480	0	173480	2	IVNT	Astle-W_Blood-Cell-Traits_EUR_2016
rs964184	rs964184	chr11:116648917	chr11:116778201	C	G	rs964184	chr11:116648917	chr11:116778201	C	G	0	1	1	High light scatter percentage of red cells	EFO_0004586	Astle W	27863252	European	2016	-0.03503	0.005266	2.887e-11	-	173480	0	173480	2	IVNT	Astle-W_Blood-Cell-Traits_EUR_2016
rs964184	rs964184	chr11:116648917	chr11:116778201	C	G	rs964184	chr11:116648917	chr11:116778201	C	G	0	1	1	High light scatter reticulocyte count	EFO_0004586	Astle W	27863252	European	2016	-0.036	0.005266	8.155e-12	-	173480	0	173480	2	IVNT	Astle-W_Blood-Cell-Traits_EUR_2016
rs964184	rs964184	chr11:116648917	chr11:116778201	C	G	rs964184	chr11:116648917	chr11:116778201	C	G	0	1	1	Mean corpuscular hemoglobin concentration	EFO_0004586	Astle W	27863252	European	2016	-0.0366	0.005084	6.015e-13	-	173480	0	173480	2	IVNT	Astle-W_Blood-Cell-Traits_EUR_2016
rs964184	rs964184	chr11:116648917	chr11:116778201	C	G	rs964184	chr11:116648917	chr11:116778201	C	G	0	1	1	Mean platelet volume	EFO_0004586	Astle W	27863252	European	2016	-0.03519	0.005313	3.511e-11	-	173480	0	173480	2	IVNT	Astle-W_Blood-Cell-Traits_EUR_2016
rs964184	rs964184	chr11:116648917	chr11:116778201	C	G	rs964184	chr11:116648917	chr11:116778201	C	G	0	1	1	Neutrophil percentage of granulocytes	EFO_0004586	Astle W	27863252	European	2016	-0.02842	0.005254	6.338e-08	-	173480	0	173480	2	IVNT	Astle-W_Blood-Cell-Traits_EUR_2016
rs964184	rs964184	chr11:116648917	chr11:116778201	C	G	rs964184	chr11:116648917	chr11:116778201	C	G	0	1	1	Platelet count	EFO_0004586	Astle W	27863252	European	2016	0.04182	0.005356	5.809e-15	+	173480	0	173480	2	IVNT	Astle-W_Blood-Cell-Traits_EUR_2016
rs964184	rs964184	chr11:116648917	chr11:116778201	C	G	rs964184	chr11:116648917	chr11:116778201	C	G	0	1	1	Platelet distribution width	EFO_0004586	Astle W	27863252	European	2016	-0.07617	0.005284	4.112e-47	-	173480	0	173480	2	IVNT	Astle-W_Blood-Cell-Traits_EUR_2016
rs964184	rs964184	chr11:116648917	chr11:116778201	C	G	rs964184	chr11:116648917	chr11:116778201	C	G	0	1	1	Plateletcrit	EFO_0004586	Astle W	27863252	European	2016	0.02969	0.005375	3.32e-08	+	173480	0	173480	2	IVNT	Astle-W_Blood-Cell-Traits_EUR_2016
rs964184	rs964184	chr11:116648917	chr11:116778201	C	G	rs964184	chr11:116648917	chr11:116778201	C	G	0	1	1	Red cell distribution width	EFO_0004586	Astle W	27863252	European	2016	0.03438	0.005198	3.722e-11	+	173480	0	173480	2	IVNT	Astle-W_Blood-Cell-Traits_EUR_2016
rs964184	rs964184	chr11:116648917	chr11:116778201	C	G	rs964184	chr11:116648917	chr11:116778201	C	G	0	1	1	Reticulocyte count	EFO_0004586	Astle W	27863252	European	2016	-0.03874	0.005275	2.087e-13	-	173480	0	173480	2	IVNT	Astle-W_Blood-Cell-Traits_EUR_2016
rs964184	rs964184	chr11:116648917	chr11:116778201	C	G	rs964184	chr11:116648917	chr11:116778201	C	G	0	1	1	Reticulocyte fraction of red cells	EFO_0004586	Astle W	27863252	European	2016	-0.03808	0.005272	5.056e-13	-	173480	0	173480	2	IVNT	Astle-W_Blood-Cell-Traits_EUR_2016
rs964184	rs964184	chr11:116648917	chr11:116778201	C	G	rs964184	chr11:116648917	chr11:116778201	C	G	0	1	1	Sum eosinophil basophil counts	EFO_0004586	Astle W	27863252	European	2016	0.03345	0.005243	1.771e-10	+	173480	0	173480	2	IVNT	Astle-W_Blood-Cell-Traits_EUR_2016
rs964184	rs964184	chr11:116648917	chr11:116778201	C	G	rs964184	chr11:116648917	chr11:116778201	C	G	0	1	1	Coronary artery disease	EFO_0000378;EFO_0001645	CARDIoGRAM	21378990	European	2011	-0.126	0.0205	8.02e-10	-	82562	21011	61551	14	log OR	CARDIoGRAM_CHD_EUR_2011
rs964184	rs964184	chr11:116648917	chr11:116778201	C	G	rs964184	chr11:116648917	chr11:116778201	C	G	0	1	1	Arachidic acid 20:0	EFO_0005110	Lemaitre RN	25378659	European	2014	NA	NA	4.63e-06	+	10129	0	10129	7	%	CHARGE_Arachidic-acid_EUR_2015
rs964184	rs964184	chr11:116648917	chr11:116778201	C	G	rs964184	chr11:116648917	chr11:116778201	C	G	0	1	1	High density lipoprotein	EFO_0004612	GLGC	24097068	European	2013	0.1065	0.0071	6.086e-48	+	94289	0	94289	60	IVNT	GLGC_HDL_EUR_2013
rs964184	rs964184	chr11:116648917	chr11:116778201	C	G	rs964184	chr11:116648917	chr11:116778201	C	G	0	1	1	High density lipoprotein	EFO_0004612	GLGC	20686565	Mixed	2010	0.1039	0.0072	5.208e-47	+	99900	0	99900	46	Z-score	GLGC_HDL_Mixed_2010
rs964184	rs964184	chr11:116648917	chr11:116778201	C	G	rs964184	chr11:116648917	chr11:116778201	C	G	0	1	1	Low density lipoprotein	EFO_0004611	GLGC	24097068	European	2013	-0.0855	0.0078	2.008e-26	-	89866	0	89866	60	IVNT	GLGC_LDL_EUR_2013
rs964184	rs964184	chr11:116648917	chr11:116778201	C	G	rs964184	chr11:116648917	chr11:116778201	C	G	0	1	1	Low density lipoprotein	EFO_0004611	GLGC	20686565	Mixed	2010	-0.0807	0.0077	1.473e-26	-	95454	0	95454	46	Z-score	GLGC_LDL_Mixed_2010
rs964184	rs964184	chr11:116648917	chr11:116778201	C	G	rs964184	chr11:116648917	chr11:116778201	C	G	0	1	1	Total cholesterol	EFO_0004574	GLGC	24097068	European	2013	-0.1214	0.0076	2.838e-55	-	94573	0	94573	60	IVNT	GLGC_TC_EUR_2013
rs964184	rs964184	chr11:116648917	chr11:116778201	C	G	rs964184	chr11:116648917	chr11:116778201	C	G	0	1	1	Total cholesterol	EFO_0004574	GLGC	20686565	Mixed	2010	-0.1195	0.0075	6.205e-57	-	100184	0	100184	46	Z-score	GLGC_TC_Mixed_2010
rs964184	rs964184	chr11:116648917	chr11:116778201	C	G	rs964184	chr11:116648917	chr11:116778201	C	G	0	1	1	Triglycerides	EFO_0004530	GLGC	24097068	European	2013	-0.2341	0.0069	6.55e-224	-	90991	0	90991	60	IVNT	GLGC_TG_EUR_2013
rs964184	rs964184	chr11:116648917	chr11:116778201	C	G	rs964184	chr11:116648917	chr11:116778201	C	G	0	1	1	Triglycerides	EFO_0004530	GLGC	20686565	Mixed	2010	-0.2352	0.0071	6.71e-240	-	96598	0	96598	46	Z-score	GLGC_TG_Mixed_2010
rs964184	rs964184	chr11:116648917	chr11:116778201	C	G	rs964184	chr11:116648917	chr11:116778201	C	G	0	1	1	Change in circulating a tocopherol concentrations following 3 y of controlled vitamin E supplementation in men	GO_0008431;NCIT_C124224	Major JM	22437554	European	2012	NA	NA	3.6e-07	NA	2112	-	-	-	-	GRASP
rs964184	rs964184	chr11:116648917	chr11:116778201	C	G	rs964184	chr11:116648917	chr11:116778201	C	G	0	1	1	Circulating a tocopherol concentrations following 3 y of controlled vitamin E supplementation in men	GO_1904966;GO_0008431	Major JM	22437554	European	2012	NA	NA	2.6e-12	NA	2112	-	-	-	-	GRASP
rs964184	rs964184	chr11:116648917	chr11:116778201	C	G	rs964184	chr11:116648917	chr11:116778201	C	G	0	1	1	Circulating a tocopherol concentrations in men	-	Major JM	22437554	European	2012	NA	NA	2.7e-10	NA	2112	-	-	-	-	GRASP
rs964184	rs964184	chr11:116648917	chr11:116778201	C	G	rs964184	chr11:116648917	chr11:116778201	C	G	0	1	1	Circulating vitamin E levels circulating alpha tocopherol concentrations	EFO_0004729	Major JM	21729881	European	2011	NA	NA	7.8e-12	NA	4014	-	-	-	-	GRASP
rs964184	rs964184	chr11:116648917	chr11:116778201	C	G	rs964184	chr11:116648917	chr11:116778201	C	G	0	1	1	Coronary artery disease	EFO_0000378	GLGC	20686565	Mixed	2010	NA	NA	2e-08	NA	100184	-	-	-	-	GRASP
rs964184	rs964184	chr11:116648917	chr11:116778201	C	G	rs964184	chr11:116648917	chr11:116778201	C	G	0	1	1	Coronary artery disease	EFO_0000378	Waterworth DM	20864672	Mixed	2010	NA	NA	1.2e-09	NA	17243	-	-	-	-	GRASP
rs964184	rs964184	chr11:116648917	chr11:116778201	C	G	rs964184	chr11:116648917	chr11:116778201	C	G	0	1	1	Coronary artery disease	EFO_0000378	CARDIoGRAM	21378990	European	2011	NA	NA	1.02e-17	NA	86995	-	-	-	-	GRASP
rs964184	rs964184	chr11:116648917	chr11:116778201	C	G	rs964184	chr11:116648917	chr11:116778201	C	G	0	1	1	Coronary artery disease	EFO_0000378	Lee JY	23364394	East Asian	2013	NA	NA	1.02e-17	NA	5714	-	-	-	-	GRASP
rs964184	rs964184	chr11:116648917	chr11:116778201	C	G	rs964184	chr11:116648917	chr11:116778201	C	G	0	1	1	Coronary artery disease by angiography	EFO_0000378	CARDIoGRAM	21378990	European	2011	NA	NA	3.71e-06	NA	86995	-	-	-	-	GRASP
rs964184	rs964184	chr11:116648917	chr11:116778201	C	G	rs964184	chr11:116648917	chr11:116778201	C	G	0	1	1	Coronary artery disease men	EFO_0000378	CARDIoGRAM	21378990	European	2011	NA	NA	2.38e-06	NA	86995	-	-	-	-	GRASP
rs964184	rs964184	chr11:116648917	chr11:116778201	C	G	rs964184	chr11:116648917	chr11:116778201	C	G	0	1	1	Coronary artery disease with age of onset 50	EFO_0000378	CARDIoGRAM	21378990	European	2011	NA	NA	1.25e-07	NA	86995	-	-	-	-	GRASP
rs964184	rs964184	chr11:116648917	chr11:116778201	C	G	rs964184	chr11:116648917	chr11:116778201	C	G	0	1	1	Coronary heart disease or coronary artery disease	EFO_0001645	Grallert H	22003152	European	2011	NA	NA	8e-10	NA	13664	-	-	-	-	GRASP
rs964184	rs964184	chr11:116648917	chr11:116778201	C	G	rs964184	chr11:116648917	chr11:116778201	C	G	0	1	1	HDL cholesterol	NCIT_C61041;NCIT_C105587	Kathiresan S	19060906	European	2008	NA	NA	1.65e-13	NA	19840	-	-	-	-	GRASP
rs964184	rs964184	chr11:116648917	chr11:116778201	C	G	rs964184	chr11:116648917	chr11:116778201	C	G	0	1	1	HDL cholesterol	NCIT_C61041;NCIT_C105587	Kamatani Y	20139978	East Asian	2010	NA	NA	2.41e-07	NA	14700	-	-	-	-	GRASP
rs964184	rs964184	chr11:116648917	chr11:116778201	C	G	rs964184	chr11:116648917	chr11:116778201	C	G	0	1	1	HDL cholesterol	NCIT_C61041;NCIT_C105587	GLGC	20686565	Mixed	2010	NA	NA	5.3e-50	NA	100184	-	-	-	-	GRASP
rs964184	rs964184	chr11:116648917	chr11:116778201	C	G	rs964184	chr11:116648917	chr11:116778201	C	G	0	1	1	HDL cholesterol	NCIT_C61041;NCIT_C105587	Waterworth DM	20864672	Mixed	2010	NA	NA	1.6e-11	NA	17243	-	-	-	-	GRASP
rs964184	rs964184	chr11:116648917	chr11:116778201	C	G	rs964184	chr11:116648917	chr11:116778201	C	G	0	1	1	HDL cholesterol	NCIT_C61041;NCIT_C105587	Lettre G	21347282	African	2011	NA	NA	1e-12	NA	8090	-	-	-	-	GRASP
rs964184	rs964184	chr11:116648917	chr11:116778201	C	G	rs964184	chr11:116648917	chr11:116778201	C	G	0	1	1	HDL cholesterol	NCIT_C61041;NCIT_C105587	CARDIoGRAM	21378990	European	2011	NA	NA	2.28e-13	NA	86995	-	-	-	-	GRASP
rs964184	rs964184	chr11:116648917	chr11:116778201	C	G	rs964184	chr11:116648917	chr11:116778201	C	G	0	1	1	HDL cholesterol	NCIT_C61041;NCIT_C105587	Kim YJ	21909109	East Asian	2011	NA	NA	5.38e-19	NA	12545	-	-	-	-	GRASP
rs964184	rs964184	chr11:116648917	chr11:116778201	C	G	rs964184	chr11:116648917	chr11:116778201	C	G	0	1	1	HDL cholesterol	NCIT_C61041;NCIT_C105587	Middelberg RP	21943158	European	2011	NA	NA	1.7e-06	NA	11683	-	-	-	-	GRASP
rs964184	rs964184	chr11:116648917	chr11:116778201	C	G	rs964184	chr11:116648917	chr11:116778201	C	G	0	1	1	HDL cholesterol	NCIT_C61041;NCIT_C105587	Coram MA	23726366	Mixed	2013	NA	NA	2.81e-12	NA	11423	-	-	-	-	GRASP
rs964184	rs964184	chr11:116648917	chr11:116778201	C	G	rs964184	chr11:116648917	chr11:116778201	C	G	0	1	1	HDL cholesterol modeled HDL cholesterol	NCIT_C61041;NCIT_C105587	Turner	21589926	Mixed	2011	NA	NA	8.37e-07	NA	3740	-	-	-	-	GRASP
rs964184	rs964184	chr11:116648917	chr11:116778201	C	G	rs964184	chr11:116648917	chr11:116778201	C	G	0	1	1	HDL2 cholesterol	CHEBI_47775	Kathiresan S	19060906	European	2008	NA	NA	3.6e-06	NA	19840	-	-	-	-	GRASP
rs964184	rs964184	chr11:116648917	chr11:116778201	C	G	rs964184	chr11:116648917	chr11:116778201	C	G	0	1	1	Hypertriglyceridemia	EFO_0004211	Johansen CT	20657596	European	2010	NA	NA	5.4e-24	NA	1660	-	-	-	-	GRASP
rs964184	rs964184	chr11:116648917	chr11:116778201	C	G	rs964184	chr11:116648917	chr11:116778201	C	G	0	1	1	Hypertriglyceridemia	EFO_0004211	Weissglas Volkov D	23505323	Hispanic	2013	NA	NA	5.48e-35	NA	2240	-	-	-	-	GRASP
rs964184	rs964184	chr11:116648917	chr11:116778201	C	G	rs964184	chr11:116648917	chr11:116778201	C	G	0	1	1	Intermediate LDL cholesterol by NMR	EFO_0004195	Kathiresan S	19060906	European	2008	NA	NA	4.3e-14	NA	19840	-	-	-	-	GRASP
rs964184	rs964184	chr11:116648917	chr11:116778201	C	G	rs964184	chr11:116648917	chr11:116778201	C	G	0	1	1	LDL cholesterol	EFO_0004195	Kathiresan S	19060906	European	2008	NA	NA	1.23e-06	NA	19840	-	-	-	-	GRASP
rs964184	rs964184	chr11:116648917	chr11:116778201	C	G	rs964184	chr11:116648917	chr11:116778201	C	G	0	1	1	LDL cholesterol	EFO_0004195	GLGC	20686565	Mixed	2010	NA	NA	1.4e-27	NA	100184	-	-	-	-	GRASP
rs964184	rs964184	chr11:116648917	chr11:116778201	C	G	rs964184	chr11:116648917	chr11:116778201	C	G	0	1	1	LDL cholesterol	EFO_0004195	Waterworth DM	20864672	Mixed	2010	NA	NA	6.4e-06	NA	17243	-	-	-	-	GRASP
rs964184	rs964184	chr11:116648917	chr11:116778201	C	G	rs964184	chr11:116648917	chr11:116778201	C	G	0	1	1	Lp2 activity	EFO_0007733	Grallert H	22003152	European	2011	NA	NA	8.37e-11	NA	13664	-	-	-	-	GRASP
rs964184	rs964184	chr11:116648917	chr11:116778201	C	G	rs964184	chr11:116648917	chr11:116778201	C	G	0	1	1	Metabolic syndrome domains Atherogenic Dyslipidemia PC1	NCIT_C84442	Avery	22022282	Mixed	2011	NA	NA	1.2e-10	NA	25755	-	-	-	-	GRASP
rs964184	rs964184	chr11:116648917	chr11:116778201	C	G	rs964184	chr11:116648917	chr11:116778201	C	G	0	1	1	Metabolic syndrome domains Atherogenic Dyslipidemia PC2	NCIT_C84442	Avery	22022282	Mixed	2011	NA	NA	1.8e-12	NA	25755	-	-	-	-	GRASP
rs964184	rs964184	chr11:116648917	chr11:116778201	C	G	rs964184	chr11:116648917	chr11:116778201	C	G	0	1	1	Metabolic syndrome domains Multivariate analysis	NCIT_C84442	Avery	22022282	Mixed	2011	NA	NA	5.5e-22	NA	25755	-	-	-	-	GRASP
rs964184	rs964184	chr11:116648917	chr11:116778201	C	G	rs964184	chr11:116648917	chr11:116778201	C	G	0	1	1	Metabolic syndrome in subjects without diabetes	-	Kristiansson K	22399527	European	2012	NA	NA	7.23e-09	NA	10564	-	-	-	-	GRASP
rs964184	rs964184	chr11:116648917	chr11:116778201	C	G	rs964184	chr11:116648917	chr11:116778201	C	G	0	1	1	Myocardial infarction	EFO_0000612	CARDIoGRAM	21378990	European	2011	NA	NA	9.67e-06	NA	86995	-	-	-	-	GRASP
rs964184	rs964184	chr11:116648917	chr11:116778201	C	G	rs964184	chr11:116648917	chr11:116778201	C	G	0	1	1	Remnant lipoprotein triglycerides	NCIT_C120656	Kathiresan S	19060906	European	2008	NA	NA	6.4e-06	NA	19840	-	-	-	-	GRASP
rs964184	rs964184	chr11:116648917	chr11:116778201	C	G	rs964184	chr11:116648917	chr11:116778201	C	G	0	1	1	Small LDL cholesterol by NMR	EFO_0004195	Kathiresan S	19060906	European	2008	NA	NA	8.6e-06	NA	19840	-	-	-	-	GRASP
rs964184	rs964184	chr11:116648917	chr11:116778201	C	G	rs964184	chr11:116648917	chr11:116778201	C	G	0	1	1	Soluble transferrin receptor	NCIT_C100438	Oexle K	21149283	European	2010	NA	NA	2.94e-11	NA	6616	-	-	-	-	GRASP
rs964184	rs964184	chr11:116648917	chr11:116778201	C	G	rs964184	chr11:116648917	chr11:116778201	C	G	0	1	1	Total cholesterol	NCIT_C61032;NCIT_C105586	Barber M	20339536	European	2010	NA	NA	1.917e-14	NA	3928	-	-	-	-	GRASP
rs964184	rs964184	chr11:116648917	chr11:116778201	C	G	rs964184	chr11:116648917	chr11:116778201	C	G	0	1	1	Total cholesterol	NCIT_C61032;NCIT_C105586	GLGC	20686565	Mixed	2010	NA	NA	1.3e-59	NA	100184	-	-	-	-	GRASP
rs964184	rs964184	chr11:116648917	chr11:116778201	C	G	rs964184	chr11:116648917	chr11:116778201	C	G	0	1	1	Total cholesterol	NCIT_C61032;NCIT_C105586	CARDIoGRAM	21378990	European	2011	NA	NA	9.84e-11	NA	86995	-	-	-	-	GRASP
rs964184	rs964184	chr11:116648917	chr11:116778201	C	G	rs964184	chr11:116648917	chr11:116778201	C	G	0	1	1	Total cholesterol to HDL cholesterol ratio	NCIT_C80171;NCIT_C120644	Kathiresan S	19060906	European	2008	NA	NA	9.2e-09	NA	19840	-	-	-	-	GRASP
rs964184	rs964184	chr11:116648917	chr11:116778201	C	G	rs964184	chr11:116648917	chr11:116778201	C	G	0	1	1	Triglycerides	-	Willer CJ	18193043	European	2008	NA	NA	1.5e-16	NA	8656	-	-	-	-	GRASP
rs964184	rs964184	chr11:116648917	chr11:116778201	C	G	rs964184	chr11:116648917	chr11:116778201	C	G	0	1	1	Triglycerides	EFO_0004530	Kathiresan S	19060906	European	2008	NA	NA	1.02e-69	NA	19840	-	-	-	-	GRASP
rs964184	rs964184	chr11:116648917	chr11:116778201	C	G	rs964184	chr11:116648917	chr11:116778201	C	G	0	1	1	Triglycerides	-	Kamatani Y	20139978	East Asian	2010	NA	NA	1.67e-49	NA	14700	-	-	-	-	GRASP
rs964184	rs964184	chr11:116648917	chr11:116778201	C	G	rs964184	chr11:116648917	chr11:116778201	C	G	0	1	1	Triglycerides	-	GLGC	20686565	Mixed	2010	NA	NA	7.6e-252	NA	100184	-	-	-	-	GRASP
rs964184	rs964184	chr11:116648917	chr11:116778201	C	G	rs964184	chr11:116648917	chr11:116778201	C	G	0	1	1	Triglycerides	-	Smith EN	20838585	European	2010	NA	NA	1.9e-06	NA	525	-	-	-	-	GRASP
rs964184	rs964184	chr11:116648917	chr11:116778201	C	G	rs964184	chr11:116648917	chr11:116778201	C	G	0	1	1	Triglycerides	-	Waterworth DM	20864672	Mixed	2010	NA	NA	9e-53	NA	17243	-	-	-	-	GRASP
rs964184	rs964184	chr11:116648917	chr11:116778201	C	G	rs964184	chr11:116648917	chr11:116778201	C	G	0	1	1	Triglycerides	-	Kim YJ	21909109	East Asian	2011	NA	NA	4.92e-43	NA	12545	-	-	-	-	GRASP
rs964184	rs964184	chr11:116648917	chr11:116778201	C	G	rs964184	chr11:116648917	chr11:116778201	C	G	0	1	1	Triglycerides	-	Middelberg RP	21943158	European	2011	NA	NA	7.2e-40	NA	11683	-	-	-	-	GRASP
rs964184	rs964184	chr11:116648917	chr11:116778201	C	G	rs964184	chr11:116648917	chr11:116778201	C	G	0	1	1	Triglycerides	-	Asselbergs	23063622	European	2012	NA	NA	3.48e-09	NA	66240	-	-	-	-	GRASP
rs964184	rs964184	chr11:116648917	chr11:116778201	C	G	rs964184	chr11:116648917	chr11:116778201	C	G	0	1	1	Triglycerides	-	Weissglas Volkov D	23505323	Hispanic	2013	NA	NA	1.04e-19	NA	2240	-	-	-	-	GRASP
rs964184	rs964184	chr11:116648917	chr11:116778201	C	G	rs964184	chr11:116648917	chr11:116778201	C	G	0	1	1	Triglycerides	-	Wood	23696881	Mixed	2013	NA	NA	9.03e-09	NA	1210	-	-	-	-	GRASP
rs964184	rs964184	chr11:116648917	chr11:116778201	C	G	rs964184	chr11:116648917	chr11:116778201	C	G	0	1	1	Triglycerides	-	Coram MA	23726366	Mixed	2013	NA	NA	3.66e-33	NA	11423	-	-	-	-	GRASP
rs964184	rs964184	chr11:116648917	chr11:116778201	C	G	rs964184	chr11:116648917	chr11:116778201	C	G	0	1	1	Triglycerides change with statins	NCIT_C906	Barber M	20339536	European	2010	NA	NA	1.9e-14	NA	3928	-	-	-	-	GRASP
rs964184	rs964184	chr11:116648917	chr11:116778201	C	G	rs964184	chr11:116648917	chr11:116778201	C	G	0	1	1	Triglycerides exam 1	-	Kathiresan S	19060906	European	2008	NA	NA	6.4e-11	NA	19840	-	-	-	-	GRASP
rs964184	rs964184	chr11:116648917	chr11:116778201	C	G	rs964184	chr11:116648917	chr11:116778201	C	G	0	1	1	Triglycerides in metabolic syndrome subjects without diabetes	-	Kristiansson K	22399527	European	2012	NA	NA	2.59e-31	NA	10564	-	-	-	-	GRASP
rs964184	rs964184	chr11:116648917	chr11:116778201	C	G	rs964184	chr11:116648917	chr11:116778201	C	G	0	1	1	TriglyceridesHDL cholesterol ratio exam 1	NCIT_C121183;NCIT_C80171	Kathiresan S	19060906	European	2008	NA	NA	5.2e-12	NA	19840	-	-	-	-	GRASP
rs964184	rs964184	chr11:116648917	chr11:116778201	C	G	rs964184	chr11:116648917	chr11:116778201	C	G	0	1	1	Vitamin E alpha tocopherol	NCIT_C103350;NCIT_C74963	Wood	23696881	Mixed	2013	NA	NA	6.66e-09	NA	1210	-	-	-	-	GRASP
rs964184	rs964184	chr11:116648917	chr11:116778201	C	G	rs964184	chr11:116648917	chr11:116778201	C	G	0	1	1	Age related disease endophenotypes	EFO_0004574;EFO_0006336;EFO_0004530;EFO_0006335;EFO_0004348;EFO_0007928;EFO_0004468;EFO_0004340;EFO_0004612	He L	27790247	European	2016	NA	NA	3e-116	NA	-	-	-	-	-	NHGRI-EBI_GWAS_Catalog
rs964184	rs964184	chr11:116648917	chr11:116778201	C	G	rs964184	chr11:116648917	chr11:116778201	C	G	0	1	1	Age related diseases mortality and associated endophenotypes	EFO_0004574;EFO_0004348;EFO_0000712;EFO_0007928;EFO_0001645;EFO_0004340;EFO_0000275;EFO_0004612;EFO_0000311;EFO_0006336;EFO_0004530;EFO_0006335;EFO_0003144;EFO_0000400;EFO_0004468;EFO_0004352	He L	27790247	European	2016	NA	NA	2e-108	NA	-	-	-	-	-	NHGRI-EBI_GWAS_Catalog
rs964184	rs964184	chr11:116648917	chr11:116778201	C	G	rs964184	chr11:116648917	chr11:116778201	C	G	0	1	1	Blood metabolite levels	EFO_0005664	Shin SY	24816252	European	2014	NA	NA	8e-15	NA	-	-	-	-	-	NHGRI-EBI_GWAS_Catalog
rs964184	rs964184	chr11:116648917	chr11:116778201	C	G	rs964184	chr11:116648917	chr11:116778201	C	G	0	1	1	Cholesterol total	EFO_0004574	GLGC	20686565	Mixed	2010	-4.68	0.2943	6e-57	-	-	-	-	-	mg/dL increase	NHGRI-EBI_GWAS_Catalog
rs964184	rs964184	chr11:116648917	chr11:116778201	C	G	rs964184	chr11:116648917	chr11:116778201	C	G	0	1	1	Cholesterol total	EFO_0004574	GLGC	24097068	European	2013	0.121	0.007728	3e-55	+	-	-	-	-	unit decrease	NHGRI-EBI_GWAS_Catalog
rs964184	rs964184	chr11:116648917	chr11:116778201	C	G	rs964184	chr11:116648917	chr11:116778201	C	G	0	1	1	Cholesterol total	EFO_0004574	Surakka I	25961943	European	2015	-0.118	0.009018	4e-39	-	-	-	-	-	SD increase	NHGRI-EBI_GWAS_Catalog
rs964184	rs964184	chr11:116648917	chr11:116778201	C	G	rs964184	chr11:116648917	chr11:116778201	C	G	0	1	1	Cholesterol total	EFO_0004574	Below JE	26780889	Hispanic	2016	-0.103	0.01426	5e-13	-	-	-	-	-	unit increase	NHGRI-EBI_GWAS_Catalog
rs964184	rs964184	chr11:116648917	chr11:116778201	C	G	rs964184	chr11:116648917	chr11:116778201	C	G	0	1	1	Circulating phylloquinone levels	EFO_0004618	Dashti HS	25411281	European	2014	-0.23	0.04244	6e-08	-	-	-	-	-	unit increase	NHGRI-EBI_GWAS_Catalog
rs964184	rs964184	chr11:116648917	chr11:116778201	C	G	rs964184	chr11:116648917	chr11:116778201	C	G	0	1	1	Coronary artery disease	EFO_0003951;EFO_0003776;EFO_0003913;EFO_0001425;EFO_0000612;EFO_0000378	Nelson CP	28714975	Mixed	2017	-0.04879	0.01069	5e-06	-	-	-	-	-	log OR	NHGRI-EBI_GWAS_Catalog
rs964184	rs964184	chr11:116648917	chr11:116778201	C	G	rs964184	chr11:116648917	chr11:116778201	C	G	0	1	1	Coronary artery disease	EFO_0000378	van der Harst P	29212778	Mixed	2018	0.071	0.009141	8e-15	+	-	-	-	-	unit decrease	NHGRI-EBI_GWAS_Catalog
rs964184	rs964184	chr11:116648917	chr11:116778201	C	G	rs964184	chr11:116648917	chr11:116778201	C	G	0	1	1	Coronary artery disease	EFO_0000378	van der Harst P	29212778	Mixed	2018	0.0705	0.009076	8e-15	+	-	-	-	-	unit decrease	NHGRI-EBI_GWAS_Catalog
rs964184	rs964184	chr11:116648917	chr11:116778201	C	G	rs964184	chr11:116648917	chr11:116778201	C	G	0	1	1	Coronary artery disease or large artery stroke	EFO_0005524;EFO_0001645	Dichgans M	24262325	Unspecified	2013	NA	NA	9e-10	NA	-	-	-	-	-	NHGRI-EBI_GWAS_Catalog
rs964184	rs964184	chr11:116648917	chr11:116778201	C	G	rs964184	chr11:116648917	chr11:116778201	C	G	0	1	1	Coronary heart disease	EFO_0001645	CARDIoGRAM	21378990	European	2011	-0.1222	0.01425	1e-17	-	-	-	-	-	log OR	NHGRI-EBI_GWAS_Catalog
rs964184	rs964184	chr11:116648917	chr11:116778201	C	G	rs964184	chr11:116648917	chr11:116778201	C	G	0	1	1	HDL cholesterol	EFO_0004612	Kathiresan S	19060906	European	2008	-0.17	0.02384	1e-12	-	-	-	-	-	SD decrease	NHGRI-EBI_GWAS_Catalog
rs964184	rs964184	chr11:116648917	chr11:116778201	C	G	rs964184	chr11:116648917	chr11:116778201	C	G	0	1	1	HDL cholesterol	EFO_0004612	GLGC	20686565	Mixed	2010	-1.5	0.1041	5e-47	-	-	-	-	-	mg/dL decrease	NHGRI-EBI_GWAS_Catalog
rs964184	rs964184	chr11:116648917	chr11:116778201	C	G	rs964184	chr11:116648917	chr11:116778201	C	G	0	1	1	HDL cholesterol	EFO_0004612	Waterworth DM	20864672	Mixed	2010	-0.03	0.004474	2e-11	-	-	-	-	-	unit decrease	NHGRI-EBI_GWAS_Catalog
rs964184	rs964184	chr11:116648917	chr11:116778201	C	G	rs964184	chr11:116648917	chr11:116778201	C	G	0	1	1	HDL cholesterol	EFO_0004612	Coram MA	23726366	Mixed	2013	NA	NA	3e-12	NA	-	-	-	-	-	NHGRI-EBI_GWAS_Catalog
rs964184	rs964184	chr11:116648917	chr11:116778201	C	G	rs964184	chr11:116648917	chr11:116778201	C	G	0	1	1	HDL cholesterol	EFO_0004612	GLGC	24097068	European	2013	0.106	0.007286	6e-48	+	-	-	-	-	unit increase	NHGRI-EBI_GWAS_Catalog
rs964184	rs964184	chr11:116648917	chr11:116778201	C	G	rs964184	chr11:116648917	chr11:116778201	C	G	0	1	1	HDL cholesterol	EFO_0004612	Surakka I	25961943	European	2015	0.102	0.009172	1e-28	+	-	-	-	-	SD increase	NHGRI-EBI_GWAS_Catalog
rs964184	rs964184	chr11:116648917	chr11:116778201	C	G	rs964184	chr11:116648917	chr11:116778201	C	G	0	1	1	High light scatter reticulocyte count	EFO_0007986	Astle W	27863252	European	2016	0.036	0.005264	8e-12	+	-	-	-	-	unit decrease	NHGRI-EBI_GWAS_Catalog
rs964184	rs964184	chr11:116648917	chr11:116778201	C	G	rs964184	chr11:116648917	chr11:116778201	C	G	0	1	1	High light scatter reticulocyte percentage of red cells	EFO_0007986	Astle W	27863252	European	2016	0.03503	0.005271	3e-11	+	-	-	-	-	unit decrease	NHGRI-EBI_GWAS_Catalog
rs964184	rs964184	chr11:116648917	chr11:116778201	C	G	rs964184	chr11:116648917	chr11:116778201	C	G	0	1	1	Hypertriglyceridemia	EFO_0004211	Johansen CT	20657596	European	2010	-1.188	0.1175	5e-24	-	-	-	-	-	log OR	NHGRI-EBI_GWAS_Catalog
rs964184	rs964184	chr11:116648917	chr11:116778201	C	G	rs964184	chr11:116648917	chr11:116778201	C	G	0	1	1	Hypertriglyceridemia	EFO_0004530	Weissglas Volkov D	23505323	Hispanic	2013	NA	NA	5e-35	NA	-	-	-	-	-	NHGRI-EBI_GWAS_Catalog
rs964184	rs964184	chr11:116648917	chr11:116778201	C	G	rs964184	chr11:116648917	chr11:116778201	C	G	0	1	1	LDL cholesterol	EFO_0004611	GLGC	20686565	Mixed	2010	-2.85	0.2663	1e-26	-	-	-	-	-	mg/dL increase	NHGRI-EBI_GWAS_Catalog
rs964184	rs964184	chr11:116648917	chr11:116778201	C	G	rs964184	chr11:116648917	chr11:116778201	C	G	0	1	1	LDL cholesterol	EFO_0004611	GLGC	24097068	European	2013	0.086	0.008085	2e-26	+	-	-	-	-	unit decrease	NHGRI-EBI_GWAS_Catalog
rs964184	rs964184	chr11:116648917	chr11:116778201	C	G	rs964184	chr11:116648917	chr11:116778201	C	G	0	1	1	LDL cholesterol	EFO_0004611	Surakka I	25961943	European	2015	-0.08	0.009218	4e-18	-	-	-	-	-	SD increase	NHGRI-EBI_GWAS_Catalog
rs964184	rs964184	chr11:116648917	chr11:116778201	C	G	rs964184	chr11:116648917	chr11:116778201	C	G	0	1	1	LDL cholesterol levels	EFO_0004611	Spracklen CN	28334899	East Asian	2017	0.0855	0.009815	3e-18	+	-	-	-	-	unit decrease	NHGRI-EBI_GWAS_Catalog
rs964184	rs964184	chr11:116648917	chr11:116778201	C	G	rs964184	chr11:116648917	chr11:116778201	C	G	0	1	1	Lipoprotein associated phospholipase A2 activity and mass	EFO_0004746	Grallert H	22003152	European	2011	0.032	0.004923	8e-11	+	-	-	-	-	unit decrease	NHGRI-EBI_GWAS_Catalog
rs964184	rs964184	chr11:116648917	chr11:116778201	C	G	rs964184	chr11:116648917	chr11:116778201	C	G	0	1	1	Mean corpuscular hemoglobin concentration	EFO_0004528	Astle W	27863252	European	2016	0.0366	0.005084	6e-13	+	-	-	-	-	unit decrease	NHGRI-EBI_GWAS_Catalog
rs964184	rs964184	chr11:116648917	chr11:116778201	C	G	rs964184	chr11:116648917	chr11:116778201	C	G	0	1	1	Mean platelet volume	EFO_0004584	Astle W	27863252	European	2016	0.03519	0.005329	4e-11	+	-	-	-	-	unit decrease	NHGRI-EBI_GWAS_Catalog
rs964184	rs964184	chr11:116648917	chr11:116778201	C	G	rs964184	chr11:116648917	chr11:116778201	C	G	0	1	1	Metabolic syndrome	EFO_0000195	Kristiansson K	22399527	European	2012	NA	NA	3e-31	NA	-	-	-	-	-	NHGRI-EBI_GWAS_Catalog
rs964184	rs964184	chr11:116648917	chr11:116778201	C	G	rs964184	chr11:116648917	chr11:116778201	C	G	0	1	1	Metabolite levels	EFO_0004723	Inouye M	22916037	European	2012	NA	NA	8e-20	NA	-	-	-	-	-	NHGRI-EBI_GWAS_Catalog
rs964184	rs964184	chr11:116648917	chr11:116778201	C	G	rs964184	chr11:116648917	chr11:116778201	C	G	0	1	1	Metabolite levels lipoprotein measures	EFO_0004732;EFO_0005664	Kettunen J	27005778	European	2016	0.24	0.01401	8e-66	+	-	-	-	-	unit decrease	NHGRI-EBI_GWAS_Catalog
rs964184	rs964184	chr11:116648917	chr11:116778201	C	G	rs964184	chr11:116648917	chr11:116778201	C	G	0	1	1	Phospholipid levels plasma	EFO_0004639	Demirkan A	22359512	European	2012	NA	NA	2e-10	NA	-	-	-	-	-	NHGRI-EBI_GWAS_Catalog
rs964184	rs964184	chr11:116648917	chr11:116778201	C	G	rs964184	chr11:116648917	chr11:116778201	C	G	0	1	1	Platelet distribution width	EFO_0007984	Astle W	27863252	European	2016	0.07617	0.005283	4e-47	+	-	-	-	-	unit decrease	NHGRI-EBI_GWAS_Catalog
rs964184	rs964184	chr11:116648917	chr11:116778201	C	G	rs964184	chr11:116648917	chr11:116778201	C	G	0	1	1	Postprandial triglyceride response to high fat diet meal	EFO_0007684;EFO_0007681	Wojczynski MK	26256467	European	2015	0.3023	0.04948	1e-09	+	-	-	-	-	unit decrease	NHGRI-EBI_GWAS_Catalog
rs964184	rs964184	chr11:116648917	chr11:116778201	C	G	rs964184	chr11:116648917	chr11:116778201	C	G	0	1	1	Red cell distribution width	EFO_0005192	Astle W	27863252	European	2016	0.03438	0.005206	4e-11	+	-	-	-	-	unit increase	NHGRI-EBI_GWAS_Catalog
rs964184	rs964184	chr11:116648917	chr11:116778201	C	G	rs964184	chr11:116648917	chr11:116778201	C	G	0	1	1	Response to Vitamin E supplementation	GO_0033273	Major JM	22437554	European	2012	-0.88	0.1736	4e-07	-	-	-	-	-	unit increase	NHGRI-EBI_GWAS_Catalog
rs964184	rs964184	chr11:116648917	chr11:116778201	C	G	rs964184	chr11:116648917	chr11:116778201	C	G	0	1	1	Response to Vitamin E supplementation	GO_0033273	Major JM	22437554	European	2012	-0.07	0.01003	3e-12	-	-	-	-	-	mg/L increase	NHGRI-EBI_GWAS_Catalog
rs964184	rs964184	chr11:116648917	chr11:116778201	C	G	rs964184	chr11:116648917	chr11:116778201	C	G	0	1	1	Reticulocyte count	EFO_0007986	Astle W	27863252	European	2016	0.03874	0.005271	2e-13	+	-	-	-	-	unit decrease	NHGRI-EBI_GWAS_Catalog
rs964184	rs964184	chr11:116648917	chr11:116778201	C	G	rs964184	chr11:116648917	chr11:116778201	C	G	0	1	1	Reticulocyte fraction of red cells	EFO_0007986	Astle W	27863252	European	2016	0.03808	0.005271	5e-13	+	-	-	-	-	unit decrease	NHGRI-EBI_GWAS_Catalog
rs964184	rs964184	chr11:116648917	chr11:116778201	C	G	rs964184	chr11:116648917	chr11:116778201	C	G	0	1	1	Total cholesterol levels	EFO_0004574	Spracklen CN	28334899	East Asian	2017	0.121	0.007716	2e-55	+	-	-	-	-	unit decrease	NHGRI-EBI_GWAS_Catalog
rs964184	rs964184	chr11:116648917	chr11:116778201	C	G	rs964184	chr11:116648917	chr11:116778201	C	G	0	1	1	Total cholesterol levels	EFO_0004574	Spracklen CN	28334899	East Asian	2017	0.0449	0.009737	4e-06	+	-	-	-	-	unit decrease	NHGRI-EBI_GWAS_Catalog
rs964184	rs964184	chr11:116648917	chr11:116778201	C	G	rs964184	chr11:116648917	chr11:116778201	C	G	0	1	1	Triglyceride levels	EFO_0004530	Southam L	28548082	Mixed	2017	-0.236	0.03519	2e-11	-	-	-	-	-	unit increase	NHGRI-EBI_GWAS_Catalog
rs964184	rs964184	chr11:116648917	chr11:116778201	C	G	rs964184	chr11:116648917	chr11:116778201	C	G	0	1	1	Triglycerides	EFO_0004530	Kathiresan S	19060906	European	2008	-0.3	0.01804	4e-62	-	-	-	-	-	SD increase	NHGRI-EBI_GWAS_Catalog
rs964184	rs964184	chr11:116648917	chr11:116778201	C	G	rs964184	chr11:116648917	chr11:116778201	C	G	0	1	1	Triglycerides	EFO_0004530	GLGC	20686565	Mixed	2010	-16.95	0.5125	7e-240	-	-	-	-	-	mg/dL increase	NHGRI-EBI_GWAS_Catalog
rs964184	rs964184	chr11:116648917	chr11:116778201	C	G	rs964184	chr11:116648917	chr11:116778201	C	G	0	1	1	Triglycerides	EFO_0004530	Coram MA	23726366	Mixed	2013	NA	NA	4e-33	NA	-	-	-	-	-	NHGRI-EBI_GWAS_Catalog
rs964184	rs964184	chr11:116648917	chr11:116778201	C	G	rs964184	chr11:116648917	chr11:116778201	C	G	0	1	1	Triglycerides	EFO_0004530	GLGC	24097068	European	2013	0.234	0.007326	7e-224	+	-	-	-	-	mg/dL decrease	NHGRI-EBI_GWAS_Catalog
rs964184	rs964184	chr11:116648917	chr11:116778201	C	G	rs964184	chr11:116648917	chr11:116778201	C	G	0	1	1	Triglycerides	EFO_0004530	Ko A	24886709	Hispanic	2014	NA	NA	6e-33	NA	-	-	-	-	-	NHGRI-EBI_GWAS_Catalog
rs964184	rs964184	chr11:116648917	chr11:116778201	C	G	rs964184	chr11:116648917	chr11:116778201	C	G	0	1	1	Triglycerides	EFO_0004530	Surakka I	25961943	European	2015	-0.244	0.009128	2e-157	-	-	-	-	-	SD increase	NHGRI-EBI_GWAS_Catalog
rs964184	rs964184	chr11:116648917	chr11:116778201	C	G	rs964184	chr11:116648917	chr11:116778201	C	G	0	1	1	Triglycerides	EFO_0004530	Below JE	26780889	Hispanic	2016	-0.275	0.01423	3e-83	-	-	-	-	-	unit increase	NHGRI-EBI_GWAS_Catalog
rs964184	rs964184	chr11:116648917	chr11:116778201	C	G	rs964184	chr11:116648917	chr11:116778201	C	G	0	1	1	Very long chain saturated fatty acid levels fatty acid 200	EFO_0006796	Lemaitre RN	25378659	European	2014	NA	NA	5e-06	NA	-	-	-	-	-	NHGRI-EBI_GWAS_Catalog
rs964184	rs964184	chr11:116648917	chr11:116778201	C	G	rs964184	chr11:116648917	chr11:116778201	C	G	0	1	1	Very low density lipoprotein cholesterol levels	EFO_0008317	Southam L	28548082	Mixed	2017	-0.242	0.03488	4e-12	-	-	-	-	-	unit increase	NHGRI-EBI_GWAS_Catalog
rs964184	rs964184	chr11:116648917	chr11:116778201	C	G	rs964184	chr11:116648917	chr11:116778201	C	G	0	1	1	Vitamin E levels	EFO_0004867	Major JM	21729881	European	2011	-0.04	0.005849	8e-12	-	-	-	-	-	unit increase	NHGRI-EBI_GWAS_Catalog
rs964184	rs964184	chr11:116648917	chr11:116778201	C	G	rs964184	chr11:116648917	chr11:116778201	C	G	0	1	1	Illnesses of siblings: heart disease	EFO_0003777	Neale B	UKBB	European	2017	-0.005836	0.0012	1.162e-06	-	261582	26382	235200	1	risk diff	Neale-B_UKBB_EUR_2017
rs964184	rs964184	chr11:116648917	chr11:116778201	C	G	rs964184	chr11:116648917	chr11:116778201	C	G	0	1	1	Medication for cholesterol, blood pressure or diabetes: cholesterol lowering medication	EFO_0007056	Neale B	UKBB	European	2017	-0.02906	0.00224	1.828e-38	-	154702	35840	118862	1	risk diff	Neale-B_UKBB_EUR_2017
rs964184	rs964184	chr11:116648917	chr11:116778201	C	G	rs964184	chr11:116648917	chr11:116778201	C	G	0	1	1	Medication for cholesterol, blood pressure or diabetes: none of the above	EFO_0007056	Neale B	UKBB	European	2017	0.0251	0.002505	1.246e-23	+	154702	103004	51698	1	risk diff	Neale-B_UKBB_EUR_2017
rs964184	rs964184	chr11:116648917	chr11:116778201	C	G	rs964184	chr11:116648917	chr11:116778201	C	G	0	1	1	No treatment with medication for cholesterol, blood pressure, diabetes, or take exogenous hormones	EFO_0007056	Neale B	UKBB	European	2017	0.01125	0.002274	7.548e-07	+	180203	124239	55964	1	risk diff	Neale-B_UKBB_EUR_2017
rs964184	rs964184	chr11:116648917	chr11:116778201	C	G	rs964184	chr11:116648917	chr11:116778201	C	G	0	1	1	Number of self-reported non-cancer illnesses	EFO_0009801	Neale B	UKBB	European	2017	-0.01567	0.00296	1.188e-07	-	337159	0	337159	1	-	Neale-B_UKBB_EUR_2017
rs964184	rs964184	chr11:116648917	chr11:116778201	C	G	rs964184	chr11:116648917	chr11:116778201	C	G	0	1	1	Number of treatments or medications taken	EFO_0007056	Neale B	UKBB	European	2017	-0.01526	0.002874	1.087e-07	-	337159	0	337159	1	-	Neale-B_UKBB_EUR_2017
rs964184	rs964184	chr11:116648917	chr11:116778201	C	G	rs964184	chr11:116648917	chr11:116778201	C	G	0	1	1	Self-reported high cholesterol	EFO_0008111	Neale B	UKBB	European	2017	-0.02156	0.001174	2.604e-75	-	337159	41296	295863	1	risk diff	Neale-B_UKBB_EUR_2017
rs964184	rs964184	chr11:116648917	chr11:116778201	C	G	rs964184	chr11:116648917	chr11:116778201	C	G	0	1	1	Treatment with atorvastatin	EFO_0007056	Neale B	UKBB	European	2017	-0.006625	0.0006136	3.608e-27	-	337159	10167	326992	1	risk diff	Neale-B_UKBB_EUR_2017
rs964184	rs964184	chr11:116648917	chr11:116778201	C	G	rs964184	chr11:116648917	chr11:116778201	C	G	0	1	1	Treatment with bezafibrate	EFO_0007056	Neale B	UKBB	European	2017	-0.0006639	0.0001088	1.049e-09	-	337159	309	336850	1	risk diff	Neale-B_UKBB_EUR_2017
rs964184	rs964184	chr11:116648917	chr11:116778201	C	G	rs964184	chr11:116648917	chr11:116778201	C	G	0	1	1	Treatment with cholesterol lowering medication	EFO_0007056	Neale B	UKBB	European	2017	-0.02121	0.00163	1.066e-38	-	180203	22705	157498	1	risk diff	Neale-B_UKBB_EUR_2017
rs964184	rs964184	chr11:116648917	chr11:116778201	C	G	rs964184	chr11:116648917	chr11:116778201	C	G	0	1	1	Treatment with ezetimibe	EFO_0007056	Neale B	UKBB	European	2017	-0.002192	0.0002759	1.956e-15	-	337159	1997	335162	1	risk diff	Neale-B_UKBB_EUR_2017
rs964184	rs964184	chr11:116648917	chr11:116778201	C	G	rs964184	chr11:116648917	chr11:116778201	C	G	0	1	1	Treatment with fenofibrate	EFO_0007056	Neale B	UKBB	European	2017	-0.001801	0.0001309	4.977e-43	-	337159	448	336711	1	risk diff	Neale-B_UKBB_EUR_2017
rs964184	rs964184	chr11:116648917	chr11:116778201	C	G	rs964184	chr11:116648917	chr11:116778201	C	G	0	1	1	Treatment with lipantil micro 67mg capsule	EFO_0007056	Neale B	UKBB	European	2017	-0.0002829	5.254e-05	7.281e-08	-	337159	72	337087	1	risk diff	Neale-B_UKBB_EUR_2017
rs964184	rs964184	chr11:116648917	chr11:116778201	C	G	rs964184	chr11:116648917	chr11:116778201	C	G	0	1	1	Treatment with lipitor 10mg tablet	EFO_0007056	Neale B	UKBB	European	2017	-0.001782	0.0002998	2.76e-09	-	337159	2361	334798	1	risk diff	Neale-B_UKBB_EUR_2017
rs964184	rs964184	chr11:116648917	chr11:116778201	C	G	rs964184	chr11:116648917	chr11:116778201	C	G	0	1	1	Treatment with omacor 1g capsule	EFO_0007056	Neale B	UKBB	European	2017	-0.0006253	0.0001257	6.617e-07	-	337159	413	336746	1	risk diff	Neale-B_UKBB_EUR_2017
rs964184	rs964184	chr11:116648917	chr11:116778201	C	G	rs964184	chr11:116648917	chr11:116778201	C	G	0	1	1	Treatment with rosuvastatin	EFO_0007056	Neale B	UKBB	European	2017	-0.001661	0.0002821	3.89e-09	-	337159	2089	335070	1	risk diff	Neale-B_UKBB_EUR_2017
rs964184	rs964184	chr11:116648917	chr11:116778201	C	G	rs964184	chr11:116648917	chr11:116778201	C	G	0	1	1	Treatment with simvastatin	EFO_0007056	Neale B	UKBB	European	2017	-0.01131	0.001136	2.372e-23	-	337159	38492	298667	1	risk diff	Neale-B_UKBB_EUR_2017
rs964184	rs964184	chr11:116648917	chr11:116778201	C	G	rs964184	chr11:116648917	chr11:116778201	C	G	0	1	1	Coronary artery disease	EFO_0000378;EFO_0001645	Nelson CP	28714975	Mixed	2017	-0.05083	0.01109	4.68e-06	-	148715	10801	137914	1	log OR	Nelson-CP_CAD_Mixed_2017
rs964184	rs964184	chr11:116648917	chr11:116778201	C	G	rs964184	chr11:116648917	chr11:116778201	C	G	0	1	1	High density lipoprotein	EFO_0004612	Prins B	28887542	European	2017	0.14	0.02	2e-10	+	9961	0	9961	1	IVNT	Prins-B_HDL_EUR_2017
rs964184	rs964184	chr11:116648917	chr11:116778201	C	G	rs964184	chr11:116648917	chr11:116778201	C	G	0	1	1	Triglycerides	EFO_0004530	Prins B	28887542	European	2017	-0.23	0.02	6.554e-26	-	9961	0	9961	1	IVNT	Prins-B_TG_EUR_2017
rs964184	rs964184	chr11:116648917	chr11:116778201	C	G	rs964184	chr11:116648917	chr11:116778201	C	G	0	1	1	Total cholesterol	EFO_0004574	Prins B	28887542	European	2017	-0.11	0.02	1.91e-07	-	9961	0	9961	1	IVNT	Prins-B_Total-Cholesterol_EUR_2017
rs964184	rs964184	chr11:116648917	chr11:116778201	C	G	rs964184	chr11:116648917	chr11:116778201	C	G	0	1	1	High density lipoprotein	EFO_0004612	Spracklen CN	28334899	East Asian	2017	0.1236	0.0093	1.01e-40	+	34309	0	34309	13	IVNT	Spracklen-CN_HDL_EAS_2017
rs964184	rs964184	chr11:116648917	chr11:116778201	C	G	rs964184	chr11:116648917	chr11:116778201	C	G	0	1	1	Total cholesterol	EFO_0004574	Spracklen CN	28334899	East Asian	2017	-0.0454	0.0098	3.55e-06	-	31953	0	31953	13	IVNT	Spracklen-CN_Total-Cholesterol_EAS_2017
rs964184	rs964184	chr11:116648917	chr11:116778201	C	G	rs964184	chr11:116648917	chr11:116778201	C	G	0	1	1	Triglycerides	EFO_0004530	Spracklen CN	28334899	East Asian	2017	-0.2163	0.0103	1.81e-96	-	27594	0	27594	13	IVNT	Spracklen-CN_Triglycerides_EAS_2017
rs964184	rs964184	chr11:116648917	chr11:116778201	C	G	rs964184	chr11:116648917	chr11:116778201	C	G	0	1	1	1 alkyl 2 acetylglycerophosphocholine esterase	-	Grallert H	22003152	European	2011	NA	NA	8e-11	NA	-	-	-	-	-	dbGaP
rs964184	rs964184	chr11:116648917	chr11:116778201	C	G	rs964184	chr11:116648917	chr11:116778201	C	G	0	1	1	Cholesterol	EFO_1001380	GLGC	20686565	Mixed	2010	NA	NA	6e-57	NA	-	-	-	-	-	dbGaP
rs964184	rs964184	chr11:116648917	chr11:116778201	C	G	rs964184	chr11:116648917	chr11:116778201	C	G	0	1	1	Cholesterol hdl	-	Kathiresan S	19060906	European	2008	NA	NA	1e-12	NA	-	-	-	-	-	dbGaP
rs964184	rs964184	chr11:116648917	chr11:116778201	C	G	rs964184	chr11:116648917	chr11:116778201	C	G	0	1	1	Cholesterol hdl	-	GLGC	20686565	Mixed	2010	NA	NA	5e-47	NA	-	-	-	-	-	dbGaP
rs964184	rs964184	chr11:116648917	chr11:116778201	C	G	rs964184	chr11:116648917	chr11:116778201	C	G	0	1	1	Cholesterol ldl	EFO_0004195	GLGC	20686565	Mixed	2010	NA	NA	1e-26	NA	-	-	-	-	-	dbGaP
rs964184	rs964184	chr11:116648917	chr11:116778201	C	G	rs964184	chr11:116648917	chr11:116778201	C	G	0	1	1	Coronary artery disease	EFO_0000378	CARDIoGRAM	21378990	European	2011	NA	NA	1e-17	NA	-	-	-	-	-	dbGaP
rs964184	rs964184	chr11:116648917	chr11:116778201	C	G	rs964184	chr11:116648917	chr11:116778201	C	G	0	1	1	Hypertriglyceridemia	EFO_0004211	Johansen CT	20657596	European	2010	NA	NA	5e-24	NA	-	-	-	-	-	dbGaP
rs964184	rs964184	chr11:116648917	chr11:116778201	C	G	rs964184	chr11:116648917	chr11:116778201	C	G	0	1	1	Lipoproteins hdl	-	Waterworth DM	20864672	Mixed	2010	NA	NA	2e-11	NA	-	-	-	-	-	dbGaP
rs964184	rs964184	chr11:116648917	chr11:116778201	C	G	rs964184	chr11:116648917	chr11:116778201	C	G	0	1	1	Metabolic syndrome x	EFO_0000195	Kristiansson K	22399527	European	2012	NA	NA	3e-31	NA	-	-	-	-	-	dbGaP
rs964184	rs964184	chr11:116648917	chr11:116778201	C	G	rs964184	chr11:116648917	chr11:116778201	C	G	0	1	1	Phospholipids	NCIT_C70561	Demirkan A	22359512	European	2012	NA	NA	2e-10	NA	-	-	-	-	-	dbGaP
rs964184	rs964184	chr11:116648917	chr11:116778201	C	G	rs964184	chr11:116648917	chr11:116778201	C	G	0	1	1	Triglycerides	-	Kathiresan S	19060906	European	2008	NA	NA	4e-62	NA	-	-	-	-	-	dbGaP
rs964184	rs964184	chr11:116648917	chr11:116778201	C	G	rs964184	chr11:116648917	chr11:116778201	C	G	0	1	1	Triglycerides	-	GLGC	20686565	Mixed	2010	NA	NA	7e-240	NA	-	-	-	-	-	dbGaP
rs964184	rs964184	chr11:116648917	chr11:116778201	C	G	rs964184	chr11:116648917	chr11:116778201	C	G	0	1	1	Vitamin E	CHEBI_18145	Major JM	21729881	European	2011	NA	NA	8e-12	NA	-	-	-	-	-	dbGaP
rs964184	rs964184	chr11:116648917	chr11:116778201	C	G	rs964184	chr11:116648917	chr11:116778201	C	G	0	1	1	Vitamin E	CHEBI_18145	Major JM	22437554	European	2012	NA	NA	3e-12	NA	-	-	-	-	-	dbGaP
rs964184	rs964184	chr11:116648917	chr11:116778201	C	G	rs964184	chr11:116648917	chr11:116778201	C	G	0	1	1	Vitamin E	CHEBI_18145	Major JM	22437554	European	2012	NA	NA	4e-07	NA	-	-	-	-	-	dbGaP
rs964184	rs964184	chr11:116648917	chr11:116778201	C	G	rs964184	chr11:116648917	chr11:116778201	C	G	0	1	1	Coronary artery disease	EFO_0000378;EFO_0001645	van der Harst P	29212778	Mixed	2018	-0.06037	0.0101	2.2e-09	-	296525	34541	261984	1	log OR	van-der-Harst-P_CAD-UKBB_Mixed_2018
rs964184	rs964184	chr11:116648917	chr11:116778201	C	G	rs964184	chr11:116648917	chr11:116778201	C	G	0	1	1	Coronary artery disease	EFO_0000378;EFO_0001645	van der Harst P	29212778	Mixed	2018	-0.0561	0.0079	1.151e-12	-	547261	122733	424528	2	log OR	van-der-Harst-P_CAD_Mixed_2018
rs964184	rs964184	chr11:116648917	chr11:116778201	C	G	rs66505542	chr11:116623213	chr11:116752497	T	TA	1	0.84938	0.98502	Eosinophil count	EFO_0004586	Astle W	27863252	European	2016	0.03228	0.005129	3.11e-10	+	173480	0	173480	2	IVNT	Astle-W_Blood-Cell-Traits_EUR_2016
rs964184	rs964184	chr11:116648917	chr11:116778201	C	G	rs66505542	chr11:116623213	chr11:116752497	T	TA	1	0.84938	0.98502	Eosinophil percentage of granulocytes	EFO_0004586	Astle W	27863252	European	2016	0.02694	0.005145	1.642e-07	+	173480	0	173480	2	IVNT	Astle-W_Blood-Cell-Traits_EUR_2016
rs964184	rs964184	chr11:116648917	chr11:116778201	C	G	rs66505542	chr11:116623213	chr11:116752497	T	TA	1	0.84938	0.98502	Eosinophil percentage of white cells	EFO_0004586	Astle W	27863252	European	2016	0.02763	0.005123	6.951e-08	+	173480	0	173480	2	IVNT	Astle-W_Blood-Cell-Traits_EUR_2016
rs964184	rs964184	chr11:116648917	chr11:116778201	C	G	rs66505542	chr11:116623213	chr11:116752497	T	TA	1	0.84938	0.98502	High light scatter percentage of red cells	EFO_0004586	Astle W	27863252	European	2016	-0.03085	0.005158	2.233e-09	-	173480	0	173480	2	IVNT	Astle-W_Blood-Cell-Traits_EUR_2016
rs964184	rs964184	chr11:116648917	chr11:116778201	C	G	rs66505542	chr11:116623213	chr11:116752497	T	TA	1	0.84938	0.98502	High light scatter reticulocyte count	EFO_0004586	Astle W	27863252	European	2016	-0.03167	0.005158	8.245e-10	-	173480	0	173480	2	IVNT	Astle-W_Blood-Cell-Traits_EUR_2016
rs964184	rs964184	chr11:116648917	chr11:116778201	C	G	rs66505542	chr11:116623213	chr11:116752497	T	TA	1	0.84938	0.98502	Mean corpuscular hemoglobin concentration	EFO_0004586	Astle W	27863252	European	2016	-0.0345	0.004978	4.234e-12	-	173480	0	173480	2	IVNT	Astle-W_Blood-Cell-Traits_EUR_2016
rs964184	rs964184	chr11:116648917	chr11:116778201	C	G	rs66505542	chr11:116623213	chr11:116752497	T	TA	1	0.84938	0.98502	Mean platelet volume	EFO_0004586	Astle W	27863252	European	2016	-0.03362	0.005203	1.034e-10	-	173480	0	173480	2	IVNT	Astle-W_Blood-Cell-Traits_EUR_2016
rs964184	rs964184	chr11:116648917	chr11:116778201	C	G	rs66505542	chr11:116623213	chr11:116752497	T	TA	1	0.84938	0.98502	Neutrophil percentage of granulocytes	EFO_0004586	Astle W	27863252	European	2016	-0.02665	0.005146	2.229e-07	-	173480	0	173480	2	IVNT	Astle-W_Blood-Cell-Traits_EUR_2016
rs964184	rs964184	chr11:116648917	chr11:116778201	C	G	rs66505542	chr11:116623213	chr11:116752497	T	TA	1	0.84938	0.98502	Platelet count	EFO_0004586	Astle W	27863252	European	2016	0.04333	0.005245	1.44e-16	+	173480	0	173480	2	IVNT	Astle-W_Blood-Cell-Traits_EUR_2016
rs964184	rs964184	chr11:116648917	chr11:116778201	C	G	rs66505542	chr11:116623213	chr11:116752497	T	TA	1	0.84938	0.98502	Platelet distribution width	EFO_0004586	Astle W	27863252	European	2016	-0.07069	0.005174	1.709e-42	-	173480	0	173480	2	IVNT	Astle-W_Blood-Cell-Traits_EUR_2016
rs964184	rs964184	chr11:116648917	chr11:116778201	C	G	rs66505542	chr11:116623213	chr11:116752497	T	TA	1	0.84938	0.98502	Plateletcrit	EFO_0004586	Astle W	27863252	European	2016	0.03154	0.005264	2.083e-09	+	173480	0	173480	2	IVNT	Astle-W_Blood-Cell-Traits_EUR_2016
rs964184	rs964184	chr11:116648917	chr11:116778201	C	G	rs66505542	chr11:116623213	chr11:116752497	T	TA	1	0.84938	0.98502	Red cell distribution width	EFO_0004586	Astle W	27863252	European	2016	0.03357	0.00509	4.214e-11	+	173480	0	173480	2	IVNT	Astle-W_Blood-Cell-Traits_EUR_2016
rs964184	rs964184	chr11:116648917	chr11:116778201	C	G	rs66505542	chr11:116623213	chr11:116752497	T	TA	1	0.84938	0.98502	Reticulocyte count	EFO_0004586	Astle W	27863252	European	2016	-0.034	0.005167	4.708e-11	-	173480	0	173480	2	IVNT	Astle-W_Blood-Cell-Traits_EUR_2016
rs964184	rs964184	chr11:116648917	chr11:116778201	C	G	rs66505542	chr11:116623213	chr11:116752497	T	TA	1	0.84938	0.98502	Reticulocyte fraction of red cells	EFO_0004586	Astle W	27863252	European	2016	-0.03356	0.005164	8.111e-11	-	173480	0	173480	2	IVNT	Astle-W_Blood-Cell-Traits_EUR_2016
rs964184	rs964184	chr11:116648917	chr11:116778201	C	G	rs66505542	chr11:116623213	chr11:116752497	T	TA	1	0.84938	0.98502	Sum eosinophil basophil counts	EFO_0004586	Astle W	27863252	European	2016	0.03347	0.005134	7.033e-11	+	173480	0	173480	2	IVNT	Astle-W_Blood-Cell-Traits_EUR_2016
rs964184	rs964184	chr11:116648917	chr11:116778201	C	G	rs66505542	chr11:116623213	chr11:116752497	T	TA	1	0.84938	0.98502	High density lipoprotein	EFO_0004612	Prins B	28887542	European	2017	0.14	0.02	2.034e-11	+	9961	0	9961	1	IVNT	Prins-B_HDL_EUR_2017
rs964184	rs964184	chr11:116648917	chr11:116778201	C	G	rs66505542	chr11:116623213	chr11:116752497	T	TA	1	0.84938	0.98502	Triglycerides	EFO_0004530	Prins B	28887542	European	2017	-0.22	0.02	3.523e-26	-	9961	0	9961	1	IVNT	Prins-B_TG_EUR_2017
rs964184	rs964184	chr11:116648917	chr11:116778201	C	G	rs66505542	chr11:116623213	chr11:116752497	T	TA	1	0.84938	0.98502	Total cholesterol	EFO_0004574	Prins B	28887542	European	2017	-0.1	0.02	2.683e-06	-	9961	0	9961	1	IVNT	Prins-B_Total-Cholesterol_EUR_2017
rs4645543	rs4645543	chr8:140496242	chr8:139483999	C	T	rs4645543	chr8:140496242	chr8:139483999	C	T	0	1	1	Circulating phylloquinone levels	EFO_0004618	Dashti HS	25411281	European	2014	-0.42	0.08078	2e-07	-	-	-	-	-	unit decrease	NHGRI-EBI_GWAS_Catalog
rs2199565	rs2199565	chr8:140499439	chr8:139487196	T	G	rs4645543	chr8:140496242	chr8:139483999	T	C	1	1	1	Circulating phylloquinone levels	EFO_0004618	Dashti HS	25411281	European	2014	0.42	0.08078	2e-07	+	-	-	-	-	unit decrease	NHGRI-EBI_GWAS_Catalog
rs7018214	rs7018214	chr8:140505517	chr8:139493274	C	T	rs4645543	chr8:140496242	chr8:139483999	T	C	1	0.95719	1	Circulating phylloquinone levels	EFO_0004618	Dashti HS	25411281	European	2014	0.42	0.08078	2e-07	+	-	-	-	-	unit decrease	NHGRI-EBI_GWAS_Catalog
rs2108622	rs2108622	chr19:15990431	chr19:15879621	C	T	rs2108622	chr19:15990431	chr19:15879621	C	T	0	1	1	Coronary artery disease	EFO_0000378;EFO_0001645	CARDIoGRAMplusC4D	26343387	Mixed	2015	-0.0463	0.01001	3.73e-06	-	184305	60801	123504	48	log OR	CARDIoGRAMplusC4D_CHD_Mixed_2015
rs2108622	rs2108622	chr19:15990431	chr19:15879621	C	T	rs2108622	chr19:15990431	chr19:15879621	C	T	0	1	1	Myocardial infarction	EFO_0000612	CARDIoGRAMplusC4D	26343387	Mixed	2015	-0.05323	0.011	1.291e-06	-	167181	43677	123504	48	log OR	CARDIoGRAMplusC4D_MI_Mixed_2015
rs2108622	rs2108622	chr19:15990431	chr19:15879621	C	T	rs2108622	chr19:15990431	chr19:15879621	C	T	0	1	1	Acenocoumarol warfarin maintenance dose	NCIT_C75152	Teichert M	19578179	European	2009	NA	NA	2.5e-10	NA	1451	-	-	-	-	GRASP
rs2108622	rs2108622	chr19:15990431	chr19:15879621	C	T	rs2108622	chr19:15990431	chr19:15879621	C	T	0	1	1	Circulating a tocopherol concentrations following 3 y of controlled vitamin E supplementation in men	GO_1904966;GO_0008431	Major JM	22437554	European	2012	NA	NA	2.2e-07	NA	2112	-	-	-	-	GRASP
rs2108622	rs2108622	chr19:15990431	chr19:15879621	C	T	rs2108622	chr19:15990431	chr19:15879621	C	T	0	1	1	Circulating a tocopherol concentrations in men	-	Major JM	22437554	European	2012	NA	NA	1.7e-08	NA	2112	-	-	-	-	GRASP
rs2108622	rs2108622	chr19:15990431	chr19:15879621	C	T	rs2108622	chr19:15990431	chr19:15879621	C	T	0	1	1	Circulating vitamin E levels circulating alpha tocopherol concentrations	EFO_0004729	Major JM	21729881	European	2011	NA	NA	1.4e-10	NA	4014	-	-	-	-	GRASP
rs2108622	rs2108622	chr19:15990431	chr19:15879621	C	T	rs2108622	chr19:15990431	chr19:15879621	C	T	0	1	1	Warfarin dose	-	Takeuchi F	19300499	European	2009	NA	NA	3.3e-10	NA	1053	-	-	-	-	GRASP
rs2108622	rs2108622	chr19:15990431	chr19:15879621	C	T	rs2108622	chr19:15990431	chr19:15879621	C	T	0	1	1	Warfarin responsiveness	-	Cha PC	20833655	East Asian	2010	NA	NA	2.57e-08	NA	1514	-	-	-	-	GRASP
rs2108622	rs2108622	chr19:15990431	chr19:15879621	C	T	rs2108622	chr19:15990431	chr19:15879621	C	T	0	1	1	Coronary artery disease	EFO_0000378;EFO_0001645	Howson JMM	28530674	Mixed	2017	-0.038	0.008	1.84e-06	-	239061	-	-	-	log OR	Howson-JMM_CHD_EUR_2017
rs2108622	rs2108622	chr19:15990431	chr19:15879621	C	T	rs2108622	chr19:15990431	chr19:15879621	C	T	0	1	1	Acenocoumarol maintenance dosage	GO_0061476	Teichert M	19578179	European	2009	NA	NA	3e-10	NA	-	-	-	-	-	NHGRI-EBI_GWAS_Catalog
rs2108622	rs2108622	chr19:15990431	chr19:15879621	C	T	rs2108622	chr19:15990431	chr19:15879621	C	T	0	1	1	Circulating phylloquinone levels	EFO_0004618	Dashti HS	25411281	European	2014	-0.16	0.03123	3e-07	-	-	-	-	-	unit increase	NHGRI-EBI_GWAS_Catalog
rs2108622	rs2108622	chr19:15990431	chr19:15879621	C	T	rs2108622	chr19:15990431	chr19:15879621	C	T	0	1	1	Metabolite levels	EFO_0004725	Hong MG	23281178	European	2013	NA	NA	9e-24	NA	-	-	-	-	-	NHGRI-EBI_GWAS_Catalog
rs2108622	rs2108622	chr19:15990431	chr19:15879621	C	T	rs2108622	chr19:15990431	chr19:15879621	C	T	0	1	1	Response to Vitamin E supplementation	GO_0033273	Major JM	22437554	European	2012	-0.04	0.007693	2e-07	-	-	-	-	-	mg/L increase	NHGRI-EBI_GWAS_Catalog
rs2108622	rs2108622	chr19:15990431	chr19:15879621	C	T	rs2108622	chr19:15990431	chr19:15879621	C	T	0	1	1	Vitamin E levels	EFO_0004867	Major JM	21729881	European	2011	-0.03	0.004639	1e-10	-	-	-	-	-	unit increase	NHGRI-EBI_GWAS_Catalog
rs2108622	rs2108622	chr19:15990431	chr19:15879621	C	T	rs2108622	chr19:15990431	chr19:15879621	C	T	0	1	1	Warfarin maintenance dose	GO_0061476	Takeuchi F	19300499	European	2009	NA	NA	3e-10	NA	-	-	-	-	-	NHGRI-EBI_GWAS_Catalog
rs2108622	rs2108622	chr19:15990431	chr19:15879621	C	T	rs2108622	chr19:15990431	chr19:15879621	C	T	0	1	1	Warfarin maintenance dose	GO_0061476	Cha PC	20833655	East Asian	2010	NA	NA	3e-08	NA	-	-	-	-	-	NHGRI-EBI_GWAS_Catalog
rs2108622	rs2108622	chr19:15990431	chr19:15879621	C	T	rs2108622	chr19:15990431	chr19:15879621	C	T	0	1	1	Acenocoumarol	NCIT_C75152	Teichert M	19578179	European	2009	NA	NA	3e-10	NA	-	-	-	-	-	dbGaP
rs2108622	rs2108622	chr19:15990431	chr19:15879621	C	T	rs2108622	chr19:15990431	chr19:15879621	C	T	0	1	1	Vitamin E	CHEBI_18145	Major JM	21729881	European	2011	NA	NA	1e-10	NA	-	-	-	-	-	dbGaP
rs2108622	rs2108622	chr19:15990431	chr19:15879621	C	T	rs2108622	chr19:15990431	chr19:15879621	C	T	0	1	1	Vitamin E	CHEBI_18145	Major JM	22437554	European	2012	NA	NA	2e-07	NA	-	-	-	-	-	dbGaP
rs2108622	rs2108622	chr19:15990431	chr19:15879621	C	T	rs2108622	chr19:15990431	chr19:15879621	C	T	0	1	1	Warfarin	NCIT_C945;CHEBI_10033	Takeuchi F	19300499	European	2009	NA	NA	3e-10	NA	-	-	-	-	-	dbGaP
rs2108622	rs2108622	chr19:15990431	chr19:15879621	C	T	rs2108622	chr19:15990431	chr19:15879621	C	T	0	1	1	Warfarin	NCIT_C945;CHEBI_10033	Cha PC	20833655	East Asian	2010	NA	NA	3e-08	NA	-	-	-	-	-	dbGaP
rs2108622	rs2108622	chr19:15990431	chr19:15879621	C	T	rs62107766	chr19:15983485	chr19:15872675	T	A	1	0.99038	1	Coronary artery disease	EFO_0000378;EFO_0001645	CARDIoGRAMplusC4D	26343387	Mixed	2015	-0.0469	0.01003	2.91e-06	-	184305	60801	123504	48	log OR	CARDIoGRAMplusC4D_CHD_Mixed_2015
rs2108622	rs2108622	chr19:15990431	chr19:15879621	C	T	rs62107766	chr19:15983485	chr19:15872675	T	A	1	0.99038	1	Myocardial infarction	EFO_0000612	CARDIoGRAMplusC4D	26343387	Mixed	2015	-0.0537	0.01102	1.095e-06	-	167181	43677	123504	48	log OR	CARDIoGRAMplusC4D_MI_Mixed_2015
rs2108622	rs2108622	chr19:15990431	chr19:15879621	C	T	rs79400241	chr19:15984402	chr19:15873592	C	G	1	0.99038	1	Coronary artery disease	EFO_0000378;EFO_0001645	CARDIoGRAMplusC4D	26343387	Mixed	2015	-0.04679	0.01003	3.06e-06	-	184305	60801	123504	48	log OR	CARDIoGRAMplusC4D_CHD_Mixed_2015
rs2108622	rs2108622	chr19:15990431	chr19:15879621	C	T	rs79400241	chr19:15984402	chr19:15873592	C	G	1	0.99038	1	Myocardial infarction	EFO_0000612	CARDIoGRAMplusC4D	26343387	Mixed	2015	-0.05352	0.01102	1.184e-06	-	167181	43677	123504	48	log OR	CARDIoGRAMplusC4D_MI_Mixed_2015
rs2108622	rs2108622	chr19:15990431	chr19:15879621	C	T	rs55744319	chr19:15981821	chr19:15871011	G	A	1	0.98557	0.99516	Coronary artery disease	EFO_0000378;EFO_0001645	CARDIoGRAMplusC4D	26343387	Mixed	2015	-0.04714	0.01002	2.54e-06	-	184305	60801	123504	48	log OR	CARDIoGRAMplusC4D_CHD_Mixed_2015
rs2108622	rs2108622	chr19:15990431	chr19:15879621	C	T	rs55744319	chr19:15981821	chr19:15871011	G	A	1	0.98557	0.99516	Myocardial infarction	EFO_0000612	CARDIoGRAMplusC4D	26343387	Mixed	2015	-0.05402	0.01102	9.381e-07	-	167181	43677	123504	48	log OR	CARDIoGRAMplusC4D_MI_Mixed_2015
rs12609820	rs12609820	chr19:15978057	chr19:15867247	C	T	rs12609820	chr19:15978057	chr19:15867247	C	T	0	1	1	Coronary artery disease	EFO_0000378;EFO_0001645	CARDIoGRAMplusC4D	26343387	Mixed	2015	0.04504	0.009634	2.94e-06	+	184305	60801	123504	48	log OR	CARDIoGRAMplusC4D_CHD_Mixed_2015
rs12609820	rs12609820	chr19:15978057	chr19:15867247	C	T	rs12609820	chr19:15978057	chr19:15867247	C	T	0	1	1	Myocardial infarction	EFO_0000612	CARDIoGRAMplusC4D	26343387	Mixed	2015	0.05094	0.01062	1.606e-06	+	167181	43677	123504	48	log OR	CARDIoGRAMplusC4D_MI_Mixed_2015
rs12609820	rs12609820	chr19:15978057	chr19:15867247	C	T	rs140915277	chr19:15977252	chr19:15866442	G	A	1	1	1	Coronary artery disease	EFO_0000378;EFO_0001645	CARDIoGRAMplusC4D	26343387	Mixed	2015	0.04521	0.009671	2.94e-06	+	184305	60801	123504	48	log OR	CARDIoGRAMplusC4D_CHD_Mixed_2015
rs12609820	rs12609820	chr19:15978057	chr19:15867247	C	T	rs140915277	chr19:15977252	chr19:15866442	G	A	1	1	1	Myocardial infarction	EFO_0000612	CARDIoGRAMplusC4D	26343387	Mixed	2015	0.05139	0.01066	1.446e-06	+	167181	43677	123504	48	log OR	CARDIoGRAMplusC4D_MI_Mixed_2015
rs12609820	rs12609820	chr19:15978057	chr19:15867247	C	T	rs113639339	chr19:15977352	chr19:15866542	G	A	1	1	1	Coronary artery disease	EFO_0000378;EFO_0001645	CARDIoGRAMplusC4D	26343387	Mixed	2015	0.04475	0.009717	4.12e-06	+	184305	60801	123504	48	log OR	CARDIoGRAMplusC4D_CHD_Mixed_2015
rs12609820	rs12609820	chr19:15978057	chr19:15867247	C	T	rs113639339	chr19:15977352	chr19:15866542	G	A	1	1	1	Myocardial infarction	EFO_0000612	CARDIoGRAMplusC4D	26343387	Mixed	2015	0.0509	0.01072	2.047e-06	+	167181	43677	123504	48	log OR	CARDIoGRAMplusC4D_MI_Mixed_2015
rs12609820	rs12609820	chr19:15978057	chr19:15867247	C	T	rs113059233	chr19:15977368	chr19:15866558	A	G	1	1	1	Coronary artery disease	EFO_0000378;EFO_0001645	CARDIoGRAMplusC4D	26343387	Mixed	2015	0.04474	0.009731	4.26e-06	+	184305	60801	123504	48	log OR	CARDIoGRAMplusC4D_CHD_Mixed_2015
rs12609820	rs12609820	chr19:15978057	chr19:15867247	C	T	rs113059233	chr19:15977368	chr19:15866558	A	G	1	1	1	Myocardial infarction	EFO_0000612	CARDIoGRAMplusC4D	26343387	Mixed	2015	0.051	0.01072	1.976e-06	+	167181	43677	123504	48	log OR	CARDIoGRAMplusC4D_MI_Mixed_2015
rs4852146	rs4852146	chr2:79624988	chr2:79397862	C	T	rs4852146	chr2:79624988	chr2:79397862	C	T	0	1	1	Circulating phylloquinone levels	EFO_0004618	Dashti HS	25411281	European	2014	0.19	0.03567	1e-07	+	-	-	-	-	unit increase	NHGRI-EBI_GWAS_Catalog
rs7975161	rs7975161	chr12:104645405	chr12:104251627	C	T	rs7975161	chr12:104645405	chr12:104251627	C	T	0	1	1	Toenail selenium levels	EFO_0006331	Cornelis MC	25343990	European	2014	-0.023	0.004702	1e-06	-	-	-	-	-	unit decrease	NHGRI-EBI_GWAS_Catalog
rs6508367	rs6508367	chr18:22971857	chr18:25391893	C	T	rs6508367	chr18:22971857	chr18:25391893	C	T	0	1	1	Toenail selenium levels	EFO_0006331	Cornelis MC	25343990	European	2014	-0.04	0.008958	8e-06	-	-	-	-	-	unit decrease	NHGRI-EBI_GWAS_Catalog
rs2163813	rs2163813	chr19:19829101	chr19:19718292	G	T	rs2163813	chr19:19829101	chr19:19718292	G	T	0	1	1	Toenail selenium levels	EFO_0006331	Cornelis MC	25343990	European	2014	-0.018	0.003943	5e-06	-	-	-	-	-	unit decrease	NHGRI-EBI_GWAS_Catalog
rs2163813	rs2163813	chr19:19829101	chr19:19718292	G	T	rs2163813	chr19:19829101	chr19:19718292	G	T	0	1	1	Height	EFO_0004339	Neale B	UKBB	European	2017	-0.009524	0.001954	1.092e-06	-	336474	0	336474	1	IVNT	Neale-B_UKBB_EUR_2017
rs2163813	rs2163813	chr19:19829101	chr19:19718292	G	T	rs1061270	chr19:19821367	chr19:19710558	T	A	1	1	1	Height	EFO_0004339	Neale B	UKBB	European	2017	-0.009528	0.001955	1.097e-06	-	336474	0	336474	1	IVNT	Neale-B_UKBB_EUR_2017
rs2163813	rs2163813	chr19:19829101	chr19:19718292	G	T	rs12973901	chr19:19823270	chr19:19712461	A	T	1	1	1	Height	EFO_0004339	GIANT	28146470	European	2017	-0.013	0.0028	3.8e-06	-	381625	0	381625	106	IVNT	GIANT_Height_EUR_2017
rs2163813	rs2163813	chr19:19829101	chr19:19718292	G	T	rs12973901	chr19:19823270	chr19:19712461	A	T	1	1	1	Height	EFO_0004339	Neale B	UKBB	European	2017	-0.009528	0.001955	1.093e-06	-	336474	0	336474	1	IVNT	Neale-B_UKBB_EUR_2017
rs2163813	rs2163813	chr19:19829101	chr19:19718292	G	T	rs2315285	chr19:19825848	chr19:19715039	C	G	1	1	1	Height	EFO_0004339	Neale B	UKBB	European	2017	-0.009539	0.001954	1.055e-06	-	336474	0	336474	1	IVNT	Neale-B_UKBB_EUR_2017
OpenGWAS
n	beta	chr	se	position	p	id	rsid	ea	nea	eaf	trait
344729	0.0478554	1	0.00287442	3691528	3.27e-62	ukb-d-30300_irnt	rs1175550	G	A	0.230932	High light scatter reticulocyte count
344729	0.0445983	1	0.00285871	3691528	7.5e-55	ukb-d-30250_irnt	rs1175550	G	A	0.230932	Reticulocyte count
344729	0.0449307	1	0.00289572	3691528	2.81e-54	ukb-d-30290_irnt	rs1175550	G	A	0.230932	High light scatter reticulocyte percentage
344182	-0.042249	1	0.0027694	3691528	1.57e-52	ukb-d-30750_irnt	rs1175550	G	A	0.23081	Glycated haemoglobin
170761	0.0629994	1	0.00424985	3691528	1.03e-49	ebi-a-GCST004611	rs1175550	G	A	0.2319	High light scatter reticulocyte count
344728	0.0411335	1	0.00289587	3691528	8.89e-46	ukb-d-30240_irnt	rs1175550	G	A	0.230931	Reticulocyte percentage
350468	0.0403948	1	0.00285064	3691528	1.44e-45	ukb-d-30060_irnt	rs1175550	G	A	0.230895	Mean corpuscular haemoglobin concentration
344729	-0.0400153	1	0.00288452	3691528	9.56e-44	ukb-d-30270_irnt	rs1175550	G	A	0.230932	Mean sphered cell volume
172851	0.0568666	1	0.00410747	3691528	1.37e-43	ebi-a-GCST004605	rs1175550	G	A	0.2321	Mean corpuscular hemoglobin concentration
170763	0.0586573	1	0.00425008	3691528	2.5e-43	ebi-a-GCST004612	rs1175550	G	A	0.2319	High light scatter reticulocyte percentage of red cells
350473	-0.0391902	1	0.00285773	3691528	8.62e-43	ukb-d-30070_irnt	rs1175550	G	A	0.230896	Red blood cell (erythrocyte) distribution width
170641	0.0580353	1	0.00425597	3691528	2.44e-42	ebi-a-GCST004622	rs1175550	G	A	0.2319	Reticulocyte count
170690	0.0518756	1	0.00425368	3691528	3.29e-34	ebi-a-GCST004619	rs1175550	G	A	0.2319	Reticulocyte fraction of red cells
344728	0.0327445	1	0.00289303	3691528	1.08e-29	ukb-d-30280_irnt	rs1175550	G	A	0.230931	Immature reticulocyte fraction
350474	0.0251983	1	0.00227887	3691528	2.04e-28	ukb-d-30020_irnt	rs1175550	G	A	0.230895	Haemoglobin concentration
170548	0.0455377	1	0.00421123	3691528	2.97e-27	ebi-a-GCST004628	rs1175550	G	A	0.2319	Immature fraction of reticulocytes
344182	-0.17719	1	0.01848	3691528	9.04e-22	ukb-d-30750_raw	rs1175550	G	A	0.23081	Glycated haemoglobin
171529	-0.0396225	1	0.00419719	3691528	3.72e-21	ebi-a-GCST004621	rs1175550	G	A	0.232	Sum basophil neutrophil counts
2603	0.313	1	0.034	151344741	2.63e-20	ieu-a-1073	rs2769264	G	T	NA	Copper
344729	0.0216872	8	0.00240716	86268313	2.08e-19	ukb-d-30300_irnt	rs1532423	G	A	0.570432	High light scatter reticulocyte count
344729	0.021756	8	0.00242487	86268313	2.93e-19	ukb-d-30290_irnt	rs1532423	G	A	0.570432	High light scatter reticulocyte percentage
350475	0.0219802	1	0.00245515	3691528	3.49e-19	ukb-d-30010_irnt	rs1175550	G	A	0.230894	Red blood cell (erythrocyte) count
7357	-0.0216	5	0.0025	78316476	1.27e-18	met-a-362	rs921943	T	C	0.2877	Betaine
2874	0.264	5	0.03	78316476	1.43e-18	ieu-a-1075	rs921943	T	C	NA	Selenium
344728	-0.0212235	8	0.00241307	86268313	1.43e-18	ukb-d-30260_irnt	rs1532423	G	A	0.570432	Mean reticulocyte volume
2603	-0.287	15	0.033	75334184	1.55e-18	ieu-a-1079	rs2120019	C	T	NA	Zinc
116666	-0.0366979	1	0.00470922	3691528	1.9e-16	ebi-a-GCST006804	rs1175550	G	A	0.231115	Red cell distribution width
344729	0.0187498	8	0.00239396	86268313	4.81e-15	ukb-d-30250_irnt	rs1532423	G	A	0.570432	Reticulocyte count
344728	0.0188977	8	0.00242494	86268313	6.56e-15	ukb-d-30240_irnt	rs1532423	G	A	0.570434	Reticulocyte percentage
50425	0.0167	1	0.0043	3691528	8.62e-15	ieu-a-272	rs1175550	G	A	NA	Mean cell haemoglobin concentration
519282	-0.018753	15	0.002425	75334184	1.1e-14	ieu-b-34	rs2120019	C	T	0.195183	neutrophil cell count
350473	-0.0232565	15	0.003023	75334184	1.44e-14	ukb-d-30040_irnt	rs2120019	C	T	0.188834	Mean corpuscular volume
172925	0.0319697	1	0.00420583	3691528	2.93e-14	ebi-a-GCST004615	rs1175550	G	A	0.2321	Hemoglobin concentration
344728	-0.0228286	15	0.00305506	75334184	7.89e-14	ukb-d-30260_irnt	rs2120019	C	T	0.188723	Mean reticulocyte volume
350468	0.0176504	8	0.00238761	86268313	1.44e-13	ukb-d-30060_irnt	rs1532423	G	A	0.570496	Mean corpuscular haemoglobin concentration
172433	-0.0304615	1	0.0041839	3691528	3.32e-13	ebi-a-GCST004602	rs1175550	G	A	0.2321	Mean corpuscular volume
562237	-0.016689	15	0.002317	75334184	6.12e-13	ieu-b-30	rs2120019	C	T	0.196605	white blood cell count
172952	0.0301332	1	0.00421678	3691528	8.93e-13	ebi-a-GCST004601	rs1175550	G	A	0.2321	Red blood cell count
344728	0.0171572	8	0.00242233	86268313	1.41e-12	ukb-d-30280_irnt	rs1532423	G	A	0.570432	Immature reticulocyte fraction
350473	-0.0201589	1	0.00285295	3691528	1.6e-12	ukb-d-30040_irnt	rs1175550	G	A	0.230896	Mean corpuscular volume
2603	-0.178	8	0.026	86268313	6.4e-12	ieu-a-1079	rs1532423	G	A	NA	Zinc
350474	-0.019416	15	0.00294921	75334184	4.6e-11	ukb-d-30080_irnt	rs2120019	C	T	0.188833	Platelet count
170761	0.0236257	8	0.00361405	86268313	6.27e-11	ebi-a-GCST004611	rs1532423	G	A	0.5712	High light scatter reticulocyte count
2603	0.222	5	0.034	78316476	9.33e-11	ieu-a-1077	rs921943	T	C	NA	Selenium
170763	0.0229736	8	0.0036139	86268313	2.06e-10	ebi-a-GCST004612	rs1532423	G	A	0.5712	High light scatter reticulocyte percentage of red cells
170641	0.0229175	8	0.00361981	86268313	2.43e-10	ebi-a-GCST004622	rs1532423	G	A	0.5712	Reticulocyte count
172433	-0.02818	15	0.00447345	75334184	2.99e-10	ebi-a-GCST004602	rs2120019	C	T	0.192	Mean corpuscular volume
349856	-0.0190551	15	0.00303346	75334184	3.35e-10	ukb-d-30140_irnt	rs2120019	C	T	0.188847	Neutrophill count
2603	0.198	1	0.032	3691528	5.03e-10	ieu-a-1073	rs1175550	G	A	NA	Copper
170690	0.0221296	8	0.00361763	86268313	9.53e-10	ebi-a-GCST004619	rs1532423	G	A	0.5712	Reticulocyte fraction of red cells
344729	-0.0147513	8	0.00241548	86268313	1.02e-09	ukb-d-30270_irnt	rs1532423	G	A	0.570432	Mean sphered cell volume
454826	-0.010808	1	0.00180423	151344741	2.1e-09	ukb-b-7859	rs2769264	G	T	0.184426	Impedance of arm (right)
350470	-0.018188	15	0.00303778	75334184	2.14e-09	ukb-d-30000_irnt	rs2120019	C	T	0.188834	White blood cell (leukocyte) count
336172	0.0124096	5	0.00208226	78316476	2.53e-09	ukb-a-195	rs921943	T	C	0.282513	Sitting height
350470	0.0179087	15	0.00301572	75334184	2.88e-09	ukb-d-30110_irnt	rs2120019	C	T	0.188834	Platelet distribution width
350473	-0.0141193	8	0.00238909	86268313	3.43e-09	ukb-d-30040_irnt	rs1532423	G	A	0.570495	Mean corpuscular volume
344729	-0.0180595	15	0.00305802	75334184	3.52e-09	ukb-d-30270_irnt	rs2120019	C	T	0.188723	Mean sphered cell volume
344729	0.0176026	15	0.00303089	75334184	6.34e-09	ukb-d-30250_irnt	rs2120019	C	T	0.188723	Reticulocyte count
344104	0.012461	5	0.0021521	78316476	7.05e-09	ukb-d-30700_irnt	rs921943	T	C	0.28144	Creatinine
344728	0.0174732	15	0.00307011	75334184	1.26e-08	ukb-d-30240_irnt	rs2120019	C	T	0.188723	Reticulocyte percentage
3301	-0.1752	15	0.0311	75334184	1.7e-08	prot-a-328	rs2120019	C	T	0.19184	Carbonic anhydrase 1
172851	0.0195715	8	0.00348983	86268313	2.04e-08	ebi-a-GCST004605	rs1532423	G	A	0.5713	Mean corpuscular hemoglobin concentration
336474	0.0107318	5	0.00191412	78316476	2.06e-08	ukb-a-389	rs921943	T	C	0.282513	Standing height
461950	0.00797775	5	0.00144445	78316476	3.3e-08	ukb-b-10787	rs921943	T	C	0.283121	Standing height
461536	0.00913368	5	0.00166082	78316476	3.8e-08	ukb-b-16881	rs921943	T	C	0.283139	Sitting height
350471	-0.015944	15	0.0028995	75334184	3.82e-08	ukb-d-30090_irnt	rs2120019	C	T	0.188834	Platelet crit
350475	0.0128407	1	0.00234272	3691528	4.23e-08	ukb-d-30030_irnt	rs1175550	G	A	0.230894	Haematocrit percentage
447485	-0.0146414	15	0.00267972	75334184	4.7e-08	ukb-b-6066	rs2120019	C	T	0.192593	Tea intake
454753	0.00850988	1	0.00158599	151344741	8.1e-08	ukb-b-19520	rs2769264	G	T	0.184429	Arm fat-free mass (right)
454840	-0.0101977	1	0.00194224	151344741	1.5e-07	ukb-b-19921	rs2769264	G	T	0.18444	Impedance of whole body
344104	0.21795	5	0.041638	78316476	1.66e-07	ukb-d-30700_raw	rs921943	T	C	0.28144	Creatinine
454746	0.00822699	1	0.00158073	151344741	1.9e-07	ukb-b-16698	rs2769264	G	T	0.184429	Arm predicted mass (right)
172851	0.0228	15	0.00438607	75334184	2.01e-07	ebi-a-GCST004605	rs2120019	C	T	0.192	Mean corpuscular hemoglobin concentration
45828	-0.1758	15	0.0347	75334184	2.1e-07	ieu-a-273	rs2120019	C	T	NA	Mean cell volume
331279	-0.0113287	1	0.00219804	151344741	2.55e-07	ukb-a-272	rs2769264	G	T	0.184929	Impedance of arm (right)
454835	0.00723047	5	0.00143956	78316476	5.1e-07	ukb-b-12828	rs921943	T	C	0.28311	Leg fat-free mass (right)
454888	0.0080068	1	0.00159564	151344741	5.2e-07	ukb-b-14540	rs2769264	G	T	0.184433	Whole body water mass
454655	0.00805404	1	0.00161065	151344741	5.7e-07	ukb-b-9093	rs2769264	G	T	0.184431	Arm predicted mass (left)
332021	0.0091852	5	0.00183894	78316476	5.89e-07	ukb-a-35	rs921943	T	C	0.282513	Comparative height size at age 10
454874	0.00832675	1	0.00167565	151344741	6.7e-07	ukb-b-16446	rs2769264	G	T	0.184435	Basal metabolic rate
454850	0.00789529	1	0.00159304	151344741	7.2e-07	ukb-b-13354	rs2769264	G	T	0.18443	Whole body fat-free mass
454834	0.00704219	5	0.00143026	78316476	8.5e-07	ukb-b-14310	rs921943	T	C	0.283109	Leg predicted mass (right)
331221	0.00953032	1	0.00194756	151344741	9.91e-07	ukb-a-284	rs2769264	G	T	0.184929	Arm fat-free mass (right)
454672	0.00785254	1	0.00161709	151344741	1.2e-06	ukb-b-19925	rs2769264	G	T	0.184427	Arm fat-free mass (left)
454850	-0.00875075	1	0.00181073	151344741	1.3e-06	ukb-b-19379	rs2769264	G	T	0.184435	Impedance of arm (left)
454799	0.00691743	5	0.00143096	78316476	1.3e-06	ukb-b-17271	rs921943	T	C	0.283109	Leg predicted mass (left)
331216	0.00938618	1	0.00194067	151344741	1.32e-06	ukb-a-285	rs2769264	G	T	0.184929	Arm predicted mass (right)
350472	-0.0144999	15	0.00301605	75334184	1.53e-06	ukb-d-30050_irnt	rs2120019	C	T	0.188835	Mean corpuscular haemoglobin
454805	0.00688859	5	0.00144042	78316476	1.7e-06	ukb-b-16099	rs921943	T	C	0.283108	Leg fat-free mass (left)
454857	-0.0111384	1	0.00233122	151344741	1.8e-06	ukb-b-14068	rs2769264	G	T	0.184434	Impedance of leg (left)
454863	-0.0109627	1	0.00231135	151344741	2.1e-06	ukb-b-7376	rs2769264	G	T	0.184434	Impedance of leg (right)
454835	0.00789884	1	0.00167003	151344741	2.2e-06	ukb-b-12828	rs2769264	G	T	0.184431	Leg fat-free mass (right)
331146	0.00934423	1	0.00197969	151344741	2.36e-06	ukb-a-289	rs2769264	G	T	0.184929	Arm predicted mass (left)
692453	0.0105	1	0.0022	151344741	2.5e-06	ieu-b-40	rs2769264	G	T	0.1843	body mass index
454834	0.00779401	1	0.00165926	151344741	2.6e-06	ukb-b-14310	rs2769264	G	T	0.184432	Leg predicted mass (right)
336107	0.0144536	1	0.00309182	151344741	2.94e-06	ukb-a-248	rs2769264	G	T	0.184929	Body mass index (BMI)
331159	0.00928301	1	0.00198712	151344741	2.99e-06	ukb-a-288	rs2769264	G	T	0.184929	Arm fat-free mass (left)
461460	0.0118635	1	0.00253914	151344741	3e-06	ukb-b-19953	rs2769264	G	T	0.184389	Body mass index (BMI)
344104	0.011524	15	0.0024735	75334184	3.18e-06	ukb-d-30700_irnt	rs2120019	C	T	0.18894	Creatinine
454799	0.00771542	1	0.00166002	151344741	3.4e-06	ukb-b-17271	rs2769264	G	T	0.18443	Leg predicted mass (left)
337159	-0.00195741	15	0.000424364	75334184	3.98e-06	ukb-a-146	rs2120019	C	T	0.188401	Treatment/medication code: amitriptyline
331284	-0.0109862	1	0.00238331	151344741	4.04e-06	ukb-a-269	rs2769264	G	T	0.184929	Impedance of whole body
454463	0.00727897	1	0.00158196	151344741	4.2e-06	ukb-b-9685	rs2769264	G	T	0.184438	Trunk predicted mass
454805	0.00767028	1	0.00167097	151344741	4.4e-06	ukb-b-16099	rs2769264	G	T	0.184431	Leg fat-free mass (left)
52062	-0.1396	1	0.0323	3691528	4.5e-06	ieu-a-273	rs1175550	G	A	NA	Mean cell volume
454508	0.00727797	1	0.00158701	151344741	4.5e-06	ukb-b-17409	rs2769264	G	T	0.184444	Trunk fat-free mass
463010	-0.00128695	15	0.000281271	75334184	4.8e-06	ukb-b-17191	rs2120019	C	T	0.192891	Operative procedures - secondary OPCS: Y53.1 Approach to organ under radiological control
450243	0.0095	5	0.0021	78316476	5.22e-06	ebi-a-GCST90000025	rs921943	T	C	0.2829	Appendicular lean mass
454888	0.00622777	5	0.00137587	78316476	6e-06	ukb-b-14540	rs921943	T	C	0.283107	Whole body water mass
454850	0.0062184	5	0.00137362	78316476	6e-06	ukb-b-13354	rs921943	T	C	0.283107	Whole body fat-free mass
331307	0.00937708	1	0.00207247	151344741	6.05e-06	ukb-a-268	rs2769264	G	T	0.184929	Basal metabolic rate
454884	0.0115127	1	0.00255802	151344741	6.8e-06	ukb-b-2303	rs2769264	G	T	0.184432	Body mass index (BMI)
454874	0.00648862	5	0.00144476	78316476	7.1e-06	ukb-b-16446	rs921943	T	C	0.283103	Basal metabolic rate
331315	0.00888116	1	0.00197944	151344741	7.24e-06	ukb-a-267	rs2769264	G	T	0.184929	Whole body water mass
170548	0.015995	8	0.00357873	86268313	7.84e-06	ebi-a-GCST004628	rs1532423	G	A	0.5712	Immature fraction of reticulocytes
331291	0.00880031	1	0.00197655	151344741	8.5e-06	ukb-a-266	rs2769264	G	T	0.184929	Whole body fat-free mass
457873	-0.00676582	1	0.00152696	151344741	9.4e-06	ukb-b-14203	rs2769264	G	T	0.184421	Hot drink temperature
172435	-0.0200864	15	0.00454079	75334184	9.71e-06	ebi-a-GCST004610	rs2120019	C	T	0.192	White blood cell count

## Sheet: Table S4
Supplementary Table 4
PhenoScanner
snp	ref_rsid	ref_hg19_coordinates	ref_hg38_coordinates	ref_a1	ref_a2	rsid	hg19_coordinates	hg38_coordinates	a1	a2	proxy	r2	dprime	trait	efo	study	pmid	ancestry	year	beta	se	p	direction	n	n_cases	n_controls	n_studies	unit	dataset
rs1175550	rs1175550	chr1:3691528	chr1:3774964	G	A	rs1175550	chr1:3691528	chr1:3774964	G	A	0	1	1	Hemoglobin concentration	EFO_0004586	Astle W	27863252	European	2016	0.03197	0.004206	2.932e-14	+	173480	0	173480	2	IVNT	Astle-W_Blood-Cell-Traits_EUR_2016
rs1175550	rs1175550	chr1:3691528	chr1:3774964	G	A	rs1175550	chr1:3691528	chr1:3774964	G	A	0	1	1	High light scatter percentage of red cells	EFO_0004586	Astle W	27863252	European	2016	0.05866	0.00425	2.498e-43	+	173480	0	173480	2	IVNT	Astle-W_Blood-Cell-Traits_EUR_2016
rs1175550	rs1175550	chr1:3691528	chr1:3774964	G	A	rs1175550	chr1:3691528	chr1:3774964	G	A	0	1	1	High light scatter reticulocyte count	EFO_0004586	Astle W	27863252	European	2016	0.063	0.00425	1.026e-49	+	173480	0	173480	2	IVNT	Astle-W_Blood-Cell-Traits_EUR_2016
rs1175550	rs1175550	chr1:3691528	chr1:3774964	G	A	rs1175550	chr1:3691528	chr1:3774964	G	A	0	1	1	Immature fraction of reticulocytes	EFO_0004586	Astle W	27863252	European	2016	0.04554	0.004211	2.974e-27	+	173480	0	173480	2	IVNT	Astle-W_Blood-Cell-Traits_EUR_2016
rs1175550	rs1175550	chr1:3691528	chr1:3774964	G	A	rs1175550	chr1:3691528	chr1:3774964	G	A	0	1	1	Mean corpuscular hemoglobin concentration	EFO_0004586	Astle W	27863252	European	2016	0.05687	0.004107	1.37e-43	+	173480	0	173480	2	IVNT	Astle-W_Blood-Cell-Traits_EUR_2016
rs1175550	rs1175550	chr1:3691528	chr1:3774964	G	A	rs1175550	chr1:3691528	chr1:3774964	G	A	0	1	1	Mean corpuscular volume	EFO_0004586	Astle W	27863252	European	2016	-0.03046	0.004184	3.322e-13	-	173480	0	173480	2	IVNT	Astle-W_Blood-Cell-Traits_EUR_2016
rs1175550	rs1175550	chr1:3691528	chr1:3774964	G	A	rs1175550	chr1:3691528	chr1:3774964	G	A	0	1	1	Red blood cell count	EFO_0004586	Astle W	27863252	European	2016	0.03013	0.004217	8.932e-13	+	173480	0	173480	2	IVNT	Astle-W_Blood-Cell-Traits_EUR_2016
rs1175550	rs1175550	chr1:3691528	chr1:3774964	G	A	rs1175550	chr1:3691528	chr1:3774964	G	A	0	1	1	Red cell distribution width	EFO_0004586	Astle W	27863252	European	2016	-0.03962	0.004197	3.719e-21	-	173480	0	173480	2	IVNT	Astle-W_Blood-Cell-Traits_EUR_2016
rs1175550	rs1175550	chr1:3691528	chr1:3774964	G	A	rs1175550	chr1:3691528	chr1:3774964	G	A	0	1	1	Reticulocyte count	EFO_0004586	Astle W	27863252	European	2016	0.05804	0.004256	2.439e-42	+	173480	0	173480	2	IVNT	Astle-W_Blood-Cell-Traits_EUR_2016
rs1175550	rs1175550	chr1:3691528	chr1:3774964	G	A	rs1175550	chr1:3691528	chr1:3774964	G	A	0	1	1	Reticulocyte fraction of red cells	EFO_0004586	Astle W	27863252	European	2016	0.05188	0.004254	3.287e-34	+	173480	0	173480	2	IVNT	Astle-W_Blood-Cell-Traits_EUR_2016
rs1175550	rs1175550	chr1:3691528	chr1:3774964	G	A	rs1175550	chr1:3691528	chr1:3774964	G	A	0	1	1	Copper levels	CHEBI_28694	Evans DM	23720494	European	2013	NA	NA	5.03e-10	NA	2603	-	-	-	-	GRASP
rs1175550	rs1175550	chr1:3691528	chr1:3774964	G	A	rs1175550	chr1:3691528	chr1:3774964	G	A	0	1	1	Mean corpuscular hemoglobin concentration	EFO_0004528	van der Harst P	23222517	Mixed	2012	NA	NA	8.6e-15	NA	71861	-	-	-	-	GRASP
rs1175550	rs1175550	chr1:3691528	chr1:3774964	G	A	rs1175550	chr1:3691528	chr1:3774964	G	A	0	1	1	Blood trace element Cu levels	EFO_0005267	Evans DM	23720494	European	2013	-0.198	0.03184	5e-10	-	-	-	-	-	unit decrease	NHGRI-EBI_GWAS_Catalog
rs1175550	rs1175550	chr1:3691528	chr1:3774964	G	A	rs1175550	chr1:3691528	chr1:3774964	G	A	0	1	1	High light scatter reticulocyte count	EFO_0007986	Astle W	27863252	European	2016	0.063	0.004249	1e-49	+	-	-	-	-	unit increase	NHGRI-EBI_GWAS_Catalog
rs1175550	rs1175550	chr1:3691528	chr1:3774964	G	A	rs1175550	chr1:3691528	chr1:3774964	G	A	0	1	1	High light scatter reticulocyte percentage of red cells	EFO_0007986	Astle W	27863252	European	2016	0.05866	0.004245	2e-43	+	-	-	-	-	unit increase	NHGRI-EBI_GWAS_Catalog
rs1175550	rs1175550	chr1:3691528	chr1:3774964	G	A	rs1175550	chr1:3691528	chr1:3774964	G	A	0	1	1	Immature fraction of reticulocytes	EFO_0007986	Astle W	27863252	European	2016	0.04554	0.004212	3e-27	+	-	-	-	-	unit increase	NHGRI-EBI_GWAS_Catalog
rs1175550	rs1175550	chr1:3691528	chr1:3774964	G	A	rs1175550	chr1:3691528	chr1:3774964	G	A	0	1	1	Mean corpuscular hemoglobin concentration	EFO_0004528	Astle W	27863252	European	2016	0.05687	0.004101	1e-43	+	-	-	-	-	unit increase	NHGRI-EBI_GWAS_Catalog
rs1175550	rs1175550	chr1:3691528	chr1:3774964	G	A	rs1175550	chr1:3691528	chr1:3774964	G	A	0	1	1	Red blood cell count	EFO_0004305	Astle W	27863252	European	2016	0.03013	0.004217	9e-13	+	-	-	-	-	unit increase	NHGRI-EBI_GWAS_Catalog
rs1175550	rs1175550	chr1:3691528	chr1:3774964	G	A	rs1175550	chr1:3691528	chr1:3774964	G	A	0	1	1	Reticulocyte count	EFO_0007986	Astle W	27863252	European	2016	0.05804	0.004251	2e-42	+	-	-	-	-	unit increase	NHGRI-EBI_GWAS_Catalog
rs1175550	rs1175550	chr1:3691528	chr1:3774964	G	A	rs1175550	chr1:3691528	chr1:3774964	G	A	0	1	1	Reticulocyte fraction of red cells	EFO_0007986	Astle W	27863252	European	2016	0.05188	0.004251	3e-34	+	-	-	-	-	unit increase	NHGRI-EBI_GWAS_Catalog
rs1175550	rs1175550	chr1:3691528	chr1:3774964	G	A	rs1184341	chr1:3691240	chr1:3774676	T	C	1	0.97686	0.98836	Hemoglobin concentration	EFO_0004586	Astle W	27863252	European	2016	0.03081	0.004221	2.917e-13	+	173480	0	173480	2	IVNT	Astle-W_Blood-Cell-Traits_EUR_2016
rs1175550	rs1175550	chr1:3691528	chr1:3774964	G	A	rs1184341	chr1:3691240	chr1:3774676	T	C	1	0.97686	0.98836	High light scatter percentage of red cells	EFO_0004586	Astle W	27863252	European	2016	0.05455	0.004265	1.882e-37	+	173480	0	173480	2	IVNT	Astle-W_Blood-Cell-Traits_EUR_2016
rs1175550	rs1175550	chr1:3691528	chr1:3774964	G	A	rs1184341	chr1:3691240	chr1:3774676	T	C	1	0.97686	0.98836	High light scatter reticulocyte count	EFO_0004586	Astle W	27863252	European	2016	0.05869	0.004265	4.344e-43	+	173480	0	173480	2	IVNT	Astle-W_Blood-Cell-Traits_EUR_2016
rs1175550	rs1175550	chr1:3691528	chr1:3774964	G	A	rs1184341	chr1:3691240	chr1:3774676	T	C	1	0.97686	0.98836	Immature fraction of reticulocytes	EFO_0004586	Astle W	27863252	European	2016	0.04149	0.004226	9.474e-23	+	173480	0	173480	2	IVNT	Astle-W_Blood-Cell-Traits_EUR_2016
rs1175550	rs1175550	chr1:3691528	chr1:3774964	G	A	rs1184341	chr1:3691240	chr1:3774676	T	C	1	0.97686	0.98836	Mean corpuscular hemoglobin concentration	EFO_0004586	Astle W	27863252	European	2016	0.05498	0.004122	1.381e-40	+	173480	0	173480	2	IVNT	Astle-W_Blood-Cell-Traits_EUR_2016
rs1175550	rs1175550	chr1:3691528	chr1:3774964	G	A	rs1184341	chr1:3691240	chr1:3774676	T	C	1	0.97686	0.98836	Mean corpuscular volume	EFO_0004586	Astle W	27863252	European	2016	-0.02885	0.004199	6.388e-12	-	173480	0	173480	2	IVNT	Astle-W_Blood-Cell-Traits_EUR_2016
rs1175550	rs1175550	chr1:3691528	chr1:3774964	G	A	rs1184341	chr1:3691240	chr1:3774676	T	C	1	0.97686	0.98836	Red blood cell count	EFO_0004586	Astle W	27863252	European	2016	0.02863	0.004232	1.331e-11	+	173480	0	173480	2	IVNT	Astle-W_Blood-Cell-Traits_EUR_2016
rs1175550	rs1175550	chr1:3691528	chr1:3774964	G	A	rs1184341	chr1:3691240	chr1:3774676	T	C	1	0.97686	0.98836	Red cell distribution width	EFO_0004586	Astle W	27863252	European	2016	-0.03514	0.004212	7.206e-17	-	173480	0	173480	2	IVNT	Astle-W_Blood-Cell-Traits_EUR_2016
rs1175550	rs1175550	chr1:3691528	chr1:3774964	G	A	rs1184341	chr1:3691240	chr1:3774676	T	C	1	0.97686	0.98836	Reticulocyte count	EFO_0004586	Astle W	27863252	European	2016	0.05451	0.004271	2.627e-37	+	173480	0	173480	2	IVNT	Astle-W_Blood-Cell-Traits_EUR_2016
rs1175550	rs1175550	chr1:3691528	chr1:3774964	G	A	rs1184341	chr1:3691240	chr1:3774676	T	C	1	0.97686	0.98836	Reticulocyte fraction of red cells	EFO_0004586	Astle W	27863252	European	2016	0.04854	0.004269	5.87e-30	+	173480	0	173480	2	IVNT	Astle-W_Blood-Cell-Traits_EUR_2016
rs1175550	rs1175550	chr1:3691528	chr1:3774964	G	A	rs1175552	chr1:3687739	chr1:3771175	A	C	1	0.93122	0.97064	Hemoglobin concentration	EFO_0004586	Astle W	27863252	European	2016	0.03111	0.004136	5.445e-14	+	173480	0	173480	2	IVNT	Astle-W_Blood-Cell-Traits_EUR_2016
rs1175550	rs1175550	chr1:3691528	chr1:3774964	G	A	rs1175552	chr1:3687739	chr1:3771175	A	C	1	0.93122	0.97064	High light scatter percentage of red cells	EFO_0004586	Astle W	27863252	European	2016	0.05279	0.00418	1.41e-36	+	173480	0	173480	2	IVNT	Astle-W_Blood-Cell-Traits_EUR_2016
rs1175550	rs1175550	chr1:3691528	chr1:3774964	G	A	rs1175552	chr1:3687739	chr1:3771175	A	C	1	0.93122	0.97064	High light scatter reticulocyte count	EFO_0004586	Astle W	27863252	European	2016	0.05698	0.004179	2.49e-42	+	173480	0	173480	2	IVNT	Astle-W_Blood-Cell-Traits_EUR_2016
rs1175550	rs1175550	chr1:3691528	chr1:3774964	G	A	rs1175552	chr1:3687739	chr1:3771175	A	C	1	0.93122	0.97064	Immature fraction of reticulocytes	EFO_0004586	Astle W	27863252	European	2016	0.04005	0.004141	3.962e-22	+	173480	0	173480	2	IVNT	Astle-W_Blood-Cell-Traits_EUR_2016
rs1175550	rs1175550	chr1:3691528	chr1:3774964	G	A	rs1175552	chr1:3687739	chr1:3771175	A	C	1	0.93122	0.97064	Mean corpuscular hemoglobin concentration	EFO_0004586	Astle W	27863252	European	2016	0.05432	0.004039	3.168e-41	+	173480	0	173480	2	IVNT	Astle-W_Blood-Cell-Traits_EUR_2016
rs1175550	rs1175550	chr1:3691528	chr1:3774964	G	A	rs1175552	chr1:3687739	chr1:3771175	A	C	1	0.93122	0.97064	Mean corpuscular volume	EFO_0004586	Astle W	27863252	European	2016	-0.02856	0.004114	3.869e-12	-	173480	0	173480	2	IVNT	Astle-W_Blood-Cell-Traits_EUR_2016
rs1175550	rs1175550	chr1:3691528	chr1:3774964	G	A	rs1175552	chr1:3687739	chr1:3771175	A	C	1	0.93122	0.97064	Red blood cell count	EFO_0004586	Astle W	27863252	European	2016	0.02908	0.004147	2.337e-12	+	173480	0	173480	2	IVNT	Astle-W_Blood-Cell-Traits_EUR_2016
rs1175550	rs1175550	chr1:3691528	chr1:3774964	G	A	rs1175552	chr1:3687739	chr1:3771175	A	C	1	0.93122	0.97064	Red cell distribution width	EFO_0004586	Astle W	27863252	European	2016	-0.03511	0.004127	1.795e-17	-	173480	0	173480	2	IVNT	Astle-W_Blood-Cell-Traits_EUR_2016
rs1175550	rs1175550	chr1:3691528	chr1:3774964	G	A	rs1175552	chr1:3687739	chr1:3771175	A	C	1	0.93122	0.97064	Reticulocyte count	EFO_0004586	Astle W	27863252	European	2016	0.05347	0.004185	2.237e-37	+	173480	0	173480	2	IVNT	Astle-W_Blood-Cell-Traits_EUR_2016
rs1175550	rs1175550	chr1:3691528	chr1:3774964	G	A	rs1175552	chr1:3687739	chr1:3771175	A	C	1	0.93122	0.97064	Reticulocyte fraction of red cells	EFO_0004586	Astle W	27863252	European	2016	0.04747	0.004183	7.642e-30	+	173480	0	173480	2	IVNT	Astle-W_Blood-Cell-Traits_EUR_2016
rs1175550	rs1175550	chr1:3691528	chr1:3774964	G	A	rs1181870	chr1:3684954	chr1:3768390	A	C	1	0.91478	0.95922	Hemoglobin concentration	EFO_0004586	Astle W	27863252	European	2016	0.03208	0.004191	1.963e-14	+	173480	0	173480	2	IVNT	Astle-W_Blood-Cell-Traits_EUR_2016
rs1175550	rs1175550	chr1:3691528	chr1:3774964	G	A	rs1181870	chr1:3684954	chr1:3768390	A	C	1	0.91478	0.95922	High light scatter percentage of red cells	EFO_0004586	Astle W	27863252	European	2016	0.05412	0.004235	2.139e-37	+	173480	0	173480	2	IVNT	Astle-W_Blood-Cell-Traits_EUR_2016
rs1175550	rs1175550	chr1:3691528	chr1:3774964	G	A	rs1181870	chr1:3684954	chr1:3768390	A	C	1	0.91478	0.95922	High light scatter reticulocyte count	EFO_0004586	Astle W	27863252	European	2016	0.0584	0.004235	2.895e-43	+	173480	0	173480	2	IVNT	Astle-W_Blood-Cell-Traits_EUR_2016
rs1175550	rs1175550	chr1:3691528	chr1:3774964	G	A	rs1181870	chr1:3684954	chr1:3768390	A	C	1	0.91478	0.95922	Immature fraction of reticulocytes	EFO_0004586	Astle W	27863252	European	2016	0.04086	0.004197	2.11e-22	+	173480	0	173480	2	IVNT	Astle-W_Blood-Cell-Traits_EUR_2016
rs1175550	rs1175550	chr1:3691528	chr1:3774964	G	A	rs1181870	chr1:3684954	chr1:3768390	A	C	1	0.91478	0.95922	Mean corpuscular hemoglobin concentration	EFO_0004586	Astle W	27863252	European	2016	0.05548	0.004094	7.615e-42	+	173480	0	173480	2	IVNT	Astle-W_Blood-Cell-Traits_EUR_2016
rs1175550	rs1175550	chr1:3691528	chr1:3774964	G	A	rs1181870	chr1:3684954	chr1:3768390	A	C	1	0.91478	0.95922	Mean corpuscular volume	EFO_0004586	Astle W	27863252	European	2016	-0.02901	0.00417	3.443e-12	-	173480	0	173480	2	IVNT	Astle-W_Blood-Cell-Traits_EUR_2016
rs1175550	rs1175550	chr1:3691528	chr1:3774964	G	A	rs1181870	chr1:3684954	chr1:3768390	A	C	1	0.91478	0.95922	Red blood cell count	EFO_0004586	Astle W	27863252	European	2016	0.0298	0.004202	1.335e-12	+	173480	0	173480	2	IVNT	Astle-W_Blood-Cell-Traits_EUR_2016
rs1175550	rs1175550	chr1:3691528	chr1:3774964	G	A	rs1181870	chr1:3684954	chr1:3768390	A	C	1	0.91478	0.95922	Red cell distribution width	EFO_0004586	Astle W	27863252	European	2016	-0.03542	0.004182	2.491e-17	-	173480	0	173480	2	IVNT	Astle-W_Blood-Cell-Traits_EUR_2016
rs1175550	rs1175550	chr1:3691528	chr1:3774964	G	A	rs1181870	chr1:3684954	chr1:3768390	A	C	1	0.91478	0.95922	Reticulocyte count	EFO_0004586	Astle W	27863252	European	2016	0.05494	0.004241	2.247e-38	+	173480	0	173480	2	IVNT	Astle-W_Blood-Cell-Traits_EUR_2016
rs1175550	rs1175550	chr1:3691528	chr1:3774964	G	A	rs1181870	chr1:3684954	chr1:3768390	A	C	1	0.91478	0.95922	Reticulocyte fraction of red cells	EFO_0004586	Astle W	27863252	European	2016	0.04875	0.004239	1.298e-30	+	173480	0	173480	2	IVNT	Astle-W_Blood-Cell-Traits_EUR_2016
rs1175550	rs1175550	chr1:3691528	chr1:3774964	G	A	rs1181870	chr1:3684954	chr1:3768390	A	C	1	0.91478	0.95922	Hemoglobin concentration	EFO_0004509	Astle W	27863252	European	2016	0.03208	0.004193	2e-14	+	-	-	-	-	unit increase	NHGRI-EBI_GWAS_Catalog
rs1175550	rs1175550	chr1:3691528	chr1:3774964	G	A	rs70940313	chr1:3691434	chr1:3774870	CGCA	C	1	0.87754	0.9531	Hemoglobin concentration	EFO_0004586	Astle W	27863252	European	2016	0.02998	0.00417	6.562e-13	+	173480	0	173480	2	IVNT	Astle-W_Blood-Cell-Traits_EUR_2016
rs1175550	rs1175550	chr1:3691528	chr1:3774964	G	A	rs70940313	chr1:3691434	chr1:3774870	CGCA	C	1	0.87754	0.9531	High light scatter percentage of red cells	EFO_0004586	Astle W	27863252	European	2016	0.05491	0.004214	8.237e-39	+	173480	0	173480	2	IVNT	Astle-W_Blood-Cell-Traits_EUR_2016
rs1175550	rs1175550	chr1:3691528	chr1:3774964	G	A	rs70940313	chr1:3691434	chr1:3774870	CGCA	C	1	0.87754	0.9531	High light scatter reticulocyte count	EFO_0004586	Astle W	27863252	European	2016	0.05901	0.004214	1.453e-44	+	173480	0	173480	2	IVNT	Astle-W_Blood-Cell-Traits_EUR_2016
rs1175550	rs1175550	chr1:3691528	chr1:3774964	G	A	rs70940313	chr1:3691434	chr1:3774870	CGCA	C	1	0.87754	0.9531	Immature fraction of reticulocytes	EFO_0004586	Astle W	27863252	European	2016	0.04221	0.004175	4.947e-24	+	173480	0	173480	2	IVNT	Astle-W_Blood-Cell-Traits_EUR_2016
rs1175550	rs1175550	chr1:3691528	chr1:3774964	G	A	rs70940313	chr1:3691434	chr1:3774870	CGCA	C	1	0.87754	0.9531	Mean corpuscular hemoglobin concentration	EFO_0004586	Astle W	27863252	European	2016	0.05461	0.004073	5.391e-41	+	173480	0	173480	2	IVNT	Astle-W_Blood-Cell-Traits_EUR_2016
rs1175550	rs1175550	chr1:3691528	chr1:3774964	G	A	rs70940313	chr1:3691434	chr1:3774870	CGCA	C	1	0.87754	0.9531	Mean corpuscular volume	EFO_0004586	Astle W	27863252	European	2016	-0.02948	0.004148	1.181e-12	-	173480	0	173480	2	IVNT	Astle-W_Blood-Cell-Traits_EUR_2016
rs1175550	rs1175550	chr1:3691528	chr1:3774964	G	A	rs70940313	chr1:3691434	chr1:3774870	CGCA	C	1	0.87754	0.9531	Red blood cell count	EFO_0004586	Astle W	27863252	European	2016	0.02831	0.004181	1.271e-11	+	173480	0	173480	2	IVNT	Astle-W_Blood-Cell-Traits_EUR_2016
rs1175550	rs1175550	chr1:3691528	chr1:3774964	G	A	rs70940313	chr1:3691434	chr1:3774870	CGCA	C	1	0.87754	0.9531	Red cell distribution width	EFO_0004586	Astle W	27863252	European	2016	-0.03517	0.004161	2.868e-17	-	173480	0	173480	2	IVNT	Astle-W_Blood-Cell-Traits_EUR_2016
rs1175550	rs1175550	chr1:3691528	chr1:3774964	G	A	rs70940313	chr1:3691434	chr1:3774870	CGCA	C	1	0.87754	0.9531	Reticulocyte count	EFO_0004586	Astle W	27863252	European	2016	0.05468	0.00422	2.102e-38	+	173480	0	173480	2	IVNT	Astle-W_Blood-Cell-Traits_EUR_2016
rs1175550	rs1175550	chr1:3691528	chr1:3774964	G	A	rs70940313	chr1:3691434	chr1:3774870	CGCA	C	1	0.87754	0.9531	Reticulocyte fraction of red cells	EFO_0004586	Astle W	27863252	European	2016	0.0488	0.004217	5.698e-31	+	173480	0	173480	2	IVNT	Astle-W_Blood-Cell-Traits_EUR_2016
rs2769264	rs2769264	chr1:151344741	chr1:151372265	T	G	rs2769264	chr1:151344741	chr1:151372265	T	G	0	1	1	Copper levels	CHEBI_28694	Evans DM	23720494	European	2013	NA	NA	2.63e-20	NA	2603	-	-	-	-	GRASP
rs2769264	rs2769264	chr1:151344741	chr1:151372265	T	G	rs2769264	chr1:151344741	chr1:151372265	T	G	0	1	1	Blood trace element Cu levels	EFO_0005267	Evans DM	23720494	European	2013	-0.313	0.03395	3e-20	-	-	-	-	-	unit increase	NHGRI-EBI_GWAS_Catalog
rs2769264	rs2769264	chr1:151344741	chr1:151372265	T	G	rs2769264	chr1:151344741	chr1:151372265	T	G	0	1	1	Arm fat-free mass left	-	Neale B	UKBB	European	2017	-0.009283	0.001987	2.99e-06	-	331159	0	331159	1	IVNT	Neale-B_UKBB_EUR_2017
rs2769264	rs2769264	chr1:151344741	chr1:151372265	T	G	rs2769264	chr1:151344741	chr1:151372265	T	G	0	1	1	Arm fat-free mass right	-	Neale B	UKBB	European	2017	-0.00953	0.001948	9.913e-07	-	331221	0	331221	1	IVNT	Neale-B_UKBB_EUR_2017
rs2769264	rs2769264	chr1:151344741	chr1:151372265	T	G	rs2769264	chr1:151344741	chr1:151372265	T	G	0	1	1	Arm predicted mass left	-	Neale B	UKBB	European	2017	-0.009344	0.00198	2.359e-06	-	331146	0	331146	1	IVNT	Neale-B_UKBB_EUR_2017
rs2769264	rs2769264	chr1:151344741	chr1:151372265	T	G	rs2769264	chr1:151344741	chr1:151372265	T	G	0	1	1	Arm predicted mass right	-	Neale B	UKBB	European	2017	-0.009386	0.001941	1.322e-06	-	331216	0	331216	1	IVNT	Neale-B_UKBB_EUR_2017
rs2769264	rs2769264	chr1:151344741	chr1:151372265	T	G	rs2769264	chr1:151344741	chr1:151372265	T	G	0	1	1	Basal metabolic rate	EFO_0007777	Neale B	UKBB	European	2017	-0.009377	0.002072	6.053e-06	-	331307	0	331307	1	IVNT	Neale-B_UKBB_EUR_2017
rs2769264	rs2769264	chr1:151344741	chr1:151372265	T	G	rs2769264	chr1:151344741	chr1:151372265	T	G	0	1	1	Body mass index	EFO_0004340	Neale B	UKBB	European	2017	-0.01445	0.003092	2.944e-06	-	336107	0	336107	1	IVNT	Neale-B_UKBB_EUR_2017
rs2769264	rs2769264	chr1:151344741	chr1:151372265	T	G	rs2769264	chr1:151344741	chr1:151372265	T	G	0	1	1	Impedance of arm right	-	Neale B	UKBB	European	2017	0.01133	0.002198	2.551e-07	+	331279	0	331279	1	IVNT	Neale-B_UKBB_EUR_2017
rs2769264	rs2769264	chr1:151344741	chr1:151372265	T	G	rs2769264	chr1:151344741	chr1:151372265	T	G	0	1	1	Impedance of whole body	-	Neale B	UKBB	European	2017	0.01099	0.002383	4.036e-06	+	331284	0	331284	1	IVNT	Neale-B_UKBB_EUR_2017
rs2769264	rs2769264	chr1:151344741	chr1:151372265	T	G	rs2769264	chr1:151344741	chr1:151372265	T	G	0	1	1	Whole body fat-free mass	-	Neale B	UKBB	European	2017	-0.0088	0.001977	8.496e-06	-	331291	0	331291	1	IVNT	Neale-B_UKBB_EUR_2017
rs2769264	rs2769264	chr1:151344741	chr1:151372265	T	G	rs2769264	chr1:151344741	chr1:151372265	T	G	0	1	1	Whole body water mass	-	Neale B	UKBB	European	2017	-0.008881	0.001979	7.236e-06	-	331315	0	331315	1	IVNT	Neale-B_UKBB_EUR_2017
rs2769264	rs2769264	chr1:151344741	chr1:151372265	T	G	rs2769265	chr1:151344150	chr1:151371674	C	A	1	0.98531	1	Arm fat-free mass left	-	Neale B	UKBB	European	2017	-0.008937	0.001992	7.265e-06	-	331159	0	331159	1	IVNT	Neale-B_UKBB_EUR_2017
rs2769264	rs2769264	chr1:151344741	chr1:151372265	T	G	rs2769265	chr1:151344150	chr1:151371674	C	A	1	0.98531	1	Arm fat-free mass right	-	Neale B	UKBB	European	2017	-0.009115	0.001953	3.037e-06	-	331221	0	331221	1	IVNT	Neale-B_UKBB_EUR_2017
rs2769264	rs2769264	chr1:151344741	chr1:151372265	T	G	rs2769265	chr1:151344150	chr1:151371674	C	A	1	0.98531	1	Arm predicted mass left	-	Neale B	UKBB	European	2017	-0.008955	0.001985	6.429e-06	-	331146	0	331146	1	IVNT	Neale-B_UKBB_EUR_2017
rs2769264	rs2769264	chr1:151344741	chr1:151372265	T	G	rs2769265	chr1:151344150	chr1:151371674	C	A	1	0.98531	1	Arm predicted mass right	-	Neale B	UKBB	European	2017	-0.009014	0.001946	3.61e-06	-	331216	0	331216	1	IVNT	Neale-B_UKBB_EUR_2017
rs2769264	rs2769264	chr1:151344741	chr1:151372265	T	G	rs2769265	chr1:151344150	chr1:151371674	C	A	1	0.98531	1	Body mass index	EFO_0004340	Neale B	UKBB	European	2017	-0.01411	0.0031	5.31e-06	-	336107	0	336107	1	IVNT	Neale-B_UKBB_EUR_2017
rs2769264	rs2769264	chr1:151344741	chr1:151372265	T	G	rs2769265	chr1:151344150	chr1:151371674	C	A	1	0.98531	1	Impedance of arm right	-	Neale B	UKBB	European	2017	0.01113	0.002204	4.423e-07	+	331279	0	331279	1	IVNT	Neale-B_UKBB_EUR_2017
rs2769264	rs2769264	chr1:151344741	chr1:151372265	T	G	rs2769265	chr1:151344150	chr1:151371674	C	A	1	0.98531	1	Impedance of whole body	-	Neale B	UKBB	European	2017	0.01073	0.002389	7.051e-06	+	331284	0	331284	1	IVNT	Neale-B_UKBB_EUR_2017
rs2769264	rs2769264	chr1:151344741	chr1:151372265	T	G	rs1752381	chr1:151347311	chr1:151374835	A	T	1	0.96342	1	Arm fat-free mass right	-	Neale B	UKBB	European	2017	-0.008929	0.002018	9.656e-06	-	331221	0	331221	1	IVNT	Neale-B_UKBB_EUR_2017
rs2769264	rs2769264	chr1:151344741	chr1:151372265	T	G	rs1752381	chr1:151347311	chr1:151374835	A	T	1	0.96342	1	Arm predicted mass right	-	Neale B	UKBB	European	2017	-0.008914	0.002011	9.306e-06	-	331216	0	331216	1	IVNT	Neale-B_UKBB_EUR_2017
rs2769264	rs2769264	chr1:151344741	chr1:151372265	T	G	rs1752381	chr1:151347311	chr1:151374835	A	T	1	0.96342	1	Body mass index	EFO_0004340	Neale B	UKBB	European	2017	-0.01447	0.003204	6.289e-06	-	336107	0	336107	1	IVNT	Neale-B_UKBB_EUR_2017
rs2769264	rs2769264	chr1:151344741	chr1:151372265	T	G	rs1752381	chr1:151347311	chr1:151374835	A	T	1	0.96342	1	Impedance of arm right	-	Neale B	UKBB	European	2017	0.01027	0.002278	6.543e-06	+	331279	0	331279	1	IVNT	Neale-B_UKBB_EUR_2017
rs2769264	rs2769264	chr1:151344741	chr1:151372265	T	G	rs6684085	chr1:151357333	chr1:151384857	C	T	1	0.913	0.9698	Arm fat-free mass left	-	Neale B	UKBB	European	2017	-0.008841	0.001942	5.298e-06	-	331159	0	331159	1	IVNT	Neale-B_UKBB_EUR_2017
rs2769264	rs2769264	chr1:151344741	chr1:151372265	T	G	rs6684085	chr1:151357333	chr1:151384857	C	T	1	0.913	0.9698	Arm fat-free mass right	-	Neale B	UKBB	European	2017	-0.00905	0.001903	1.984e-06	-	331221	0	331221	1	IVNT	Neale-B_UKBB_EUR_2017
rs2769264	rs2769264	chr1:151344741	chr1:151372265	T	G	rs6684085	chr1:151357333	chr1:151384857	C	T	1	0.913	0.9698	Arm predicted mass left	-	Neale B	UKBB	European	2017	-0.008916	0.001935	4.048e-06	-	331146	0	331146	1	IVNT	Neale-B_UKBB_EUR_2017
rs2769264	rs2769264	chr1:151344741	chr1:151372265	T	G	rs6684085	chr1:151357333	chr1:151384857	C	T	1	0.913	0.9698	Arm predicted mass right	-	Neale B	UKBB	European	2017	-0.009031	0.001896	1.918e-06	-	331216	0	331216	1	IVNT	Neale-B_UKBB_EUR_2017
rs2769264	rs2769264	chr1:151344741	chr1:151372265	T	G	rs6684085	chr1:151357333	chr1:151384857	C	T	1	0.913	0.9698	Impedance of arm right	-	Neale B	UKBB	European	2017	0.01098	0.002148	3.155e-07	+	331279	0	331279	1	IVNT	Neale-B_UKBB_EUR_2017
rs13074172	rs13074172	chr3:142352978	chr3:142634136	A	G	rs13074172	chr3:142352978	chr3:142634136	A	G	0	1	1	Mean corpuscular hemoglobin	EFO_0004586	Astle W	27863252	European	2016	0.02996	0.003575	5.204e-17	+	173480	0	173480	2	IVNT	Astle-W_Blood-Cell-Traits_EUR_2016
rs13074172	rs13074172	chr3:142352978	chr3:142634136	A	G	rs13074172	chr3:142352978	chr3:142634136	A	G	0	1	1	Mean corpuscular volume	EFO_0004586	Astle W	27863252	European	2016	0.03358	0.003564	4.453e-21	+	173480	0	173480	2	IVNT	Astle-W_Blood-Cell-Traits_EUR_2016
rs13074172	rs13074172	chr3:142352978	chr3:142634136	A	G	rs13074172	chr3:142352978	chr3:142634136	A	G	0	1	1	Red blood cell count	EFO_0004586	Astle W	27863252	European	2016	-0.02432	0.003592	1.285e-11	-	173480	0	173480	2	IVNT	Astle-W_Blood-Cell-Traits_EUR_2016
rs13074172	rs13074172	chr3:142352978	chr3:142634136	A	G	rs13078890	chr3:142350044	chr3:142631202	T	C	1	1	1	Mean corpuscular hemoglobin	EFO_0004586	Astle W	27863252	European	2016	0.02993	0.003574	5.571e-17	+	173480	0	173480	2	IVNT	Astle-W_Blood-Cell-Traits_EUR_2016
rs13074172	rs13074172	chr3:142352978	chr3:142634136	A	G	rs13078890	chr3:142350044	chr3:142631202	T	C	1	1	1	Mean corpuscular volume	EFO_0004586	Astle W	27863252	European	2016	0.03368	0.003564	3.357e-21	+	173480	0	173480	2	IVNT	Astle-W_Blood-Cell-Traits_EUR_2016
rs13074172	rs13074172	chr3:142352978	chr3:142634136	A	G	rs13078890	chr3:142350044	chr3:142631202	T	C	1	1	1	Red blood cell count	EFO_0004586	Astle W	27863252	European	2016	-0.02458	0.003592	7.708e-12	-	173480	0	173480	2	IVNT	Astle-W_Blood-Cell-Traits_EUR_2016
rs13074172	rs13074172	chr3:142352978	chr3:142634136	A	G	rs34392719	chr3:142342112	chr3:142623270	C	T	1	0.99592	1	Mean corpuscular hemoglobin	EFO_0004586	Astle W	27863252	European	2016	0.02953	0.003574	1.447e-16	+	173480	0	173480	2	IVNT	Astle-W_Blood-Cell-Traits_EUR_2016
rs13074172	rs13074172	chr3:142352978	chr3:142634136	A	G	rs34392719	chr3:142342112	chr3:142623270	C	T	1	0.99592	1	Mean corpuscular volume	EFO_0004586	Astle W	27863252	European	2016	0.03327	0.003564	9.991e-21	+	173480	0	173480	2	IVNT	Astle-W_Blood-Cell-Traits_EUR_2016
rs13074172	rs13074172	chr3:142352978	chr3:142634136	A	G	rs34392719	chr3:142342112	chr3:142623270	C	T	1	0.99592	1	Red blood cell count	EFO_0004586	Astle W	27863252	European	2016	-0.02441	0.003591	1.066e-11	-	173480	0	173480	2	IVNT	Astle-W_Blood-Cell-Traits_EUR_2016
rs13074172	rs13074172	chr3:142352978	chr3:142634136	A	G	rs75274088	chr3:142337804	chr3:142618962	G	A	1	0.99186	1	Mean corpuscular hemoglobin	EFO_0004586	Astle W	27863252	European	2016	0.02905	0.00358	4.901e-16	+	173480	0	173480	2	IVNT	Astle-W_Blood-Cell-Traits_EUR_2016
rs13074172	rs13074172	chr3:142352978	chr3:142634136	A	G	rs75274088	chr3:142337804	chr3:142618962	G	A	1	0.99186	1	Mean corpuscular volume	EFO_0004586	Astle W	27863252	European	2016	0.03303	0.003569	2.147e-20	+	173480	0	173480	2	IVNT	Astle-W_Blood-Cell-Traits_EUR_2016
rs13074172	rs13074172	chr3:142352978	chr3:142634136	A	G	rs75274088	chr3:142337804	chr3:142618962	G	A	1	0.99186	1	Red blood cell count	EFO_0004586	Astle W	27863252	European	2016	-0.02408	0.003597	2.162e-11	-	173480	0	173480	2	IVNT	Astle-W_Blood-Cell-Traits_EUR_2016
rs13074172	rs13074172	chr3:142352978	chr3:142634136	A	G	rs6809448	chr3:142353730	chr3:142634888	C	T	1	0.92083	1	Mean corpuscular hemoglobin	EFO_0004586	Astle W	27863252	European	2016	0.02719	0.00363	6.968e-14	+	173480	0	173480	2	IVNT	Astle-W_Blood-Cell-Traits_EUR_2016
rs13074172	rs13074172	chr3:142352978	chr3:142634136	A	G	rs6809448	chr3:142353730	chr3:142634888	C	T	1	0.92083	1	Mean corpuscular volume	EFO_0004586	Astle W	27863252	European	2016	0.03173	0.00362	1.857e-18	+	173480	0	173480	2	IVNT	Astle-W_Blood-Cell-Traits_EUR_2016
rs13074172	rs13074172	chr3:142352978	chr3:142634136	A	G	rs6809448	chr3:142353730	chr3:142634888	C	T	1	0.92083	1	Red blood cell count	EFO_0004586	Astle W	27863252	European	2016	-0.02152	0.003648	3.686e-09	-	173480	0	173480	2	IVNT	Astle-W_Blood-Cell-Traits_EUR_2016
rs10014072	rs10014072	chr4:113948790	chr4:113027634	A	G	rs10014072	chr4:113948790	chr4:113027634	A	G	0	1	1	Copper levels	CHEBI_28694	Evans DM	23720494	European	2013	NA	NA	1.13e-06	NA	2603	-	-	-	-	GRASP
rs10014072	rs10014072	chr4:113948790	chr4:113027634	A	G	rs10014072	chr4:113948790	chr4:113027634	A	G	0	1	1	Blood trace element Cu levels	EFO_0005267	Evans DM	23720494	European	2013	NA	NA	1e-06	NA	-	-	-	-	-	NHGRI-EBI_GWAS_Catalog
rs12153606	rs12153606	chr5:84583769	chr5:85287951	G	T	rs12153606	chr5:84583769	chr5:85287951	G	T	0	1	1	Copper levels	CHEBI_28694	Evans DM	23720494	European	2013	NA	NA	2.49e-06	NA	2603	-	-	-	-	GRASP
rs12153606	rs12153606	chr5:84583769	chr5:85287951	G	T	rs12153606	chr5:84583769	chr5:85287951	G	T	0	1	1	Blood trace element Cu levels	EFO_0005267	Evans DM	23720494	European	2013	NA	NA	2e-06	NA	-	-	-	-	-	NHGRI-EBI_GWAS_Catalog
rs1153734	rs1153734	chr2:182867579	chr2:182002852	G	A	rs1153734	chr2:182867579	chr2:182002852	G	A	0	1	1	Height	EFO_0004339	Neale B	UKBB	European	2017	-0.009379	0.002068	5.767e-06	-	336474	0	336474	1	IVNT	Neale-B_UKBB_EUR_2017
rs1153734	rs1153734	chr2:182867579	chr2:182002852	G	A	rs1153735	chr2:182867107	chr2:182002380	T	A	1	0.95764	1	Height	EFO_0004339	Neale B	UKBB	European	2017	-0.009457	0.002067	4.788e-06	-	336474	0	336474	1	IVNT	Neale-B_UKBB_EUR_2017
rs1153734	rs1153734	chr2:182867579	chr2:182002852	G	A	rs1153731	chr2:182869208	chr2:182004481	C	T	1	0.93161	1	Height	EFO_0004339	Neale B	UKBB	European	2017	-0.01042	0.002102	7.071e-07	-	336474	0	336474	1	IVNT	Neale-B_UKBB_EUR_2017
rs1153734	rs1153734	chr2:182867579	chr2:182002852	G	A	rs1153742	chr2:182860233	chr2:181995506	A	G	1	0.8657	0.93043	Height	EFO_0004339	Neale B	UKBB	European	2017	-0.00903	0.002034	8.997e-06	-	336474	0	336474	1	IVNT	Neale-B_UKBB_EUR_2017
rs921943	rs921943	chr5:78316476	chr5:79020653	T	C	rs921943	chr5:78316476	chr5:79020653	T	C	0	1	1	Selenium levels	CHEBI_27568	Evans DM	23720494	European	2013	NA	NA	9.4e-28	NA	2603	-	-	-	-	GRASP
rs921943	rs921943	chr5:78316476	chr5:79020653	T	C	rs921943	chr5:78316476	chr5:79020653	T	C	0	1	1	Blood and toenail selenium levels	EFO_0006331	Cornelis MC	25343990	European	2014	NA	NA	2e-39	NA	-	-	-	-	-	NHGRI-EBI_GWAS_Catalog
rs921943	rs921943	chr5:78316476	chr5:79020653	T	C	rs921943	chr5:78316476	chr5:79020653	T	C	0	1	1	Blood trace element Se levels	EFO_0005266	Evans DM	23720494	European	2013	0.246	0.02252	9e-28	+	-	-	-	-	unit increase	NHGRI-EBI_GWAS_Catalog
rs921943	rs921943	chr5:78316476	chr5:79020653	T	C	rs921943	chr5:78316476	chr5:79020653	T	C	0	1	1	Comparative height size at age 10	-	Neale B	UKBB	European	2017	0.009185	0.001839	5.891e-07	+	332021	0	332021	1	-	Neale-B_UKBB_EUR_2017
rs921943	rs921943	chr5:78316476	chr5:79020653	T	C	rs921943	chr5:78316476	chr5:79020653	T	C	0	1	1	Height	EFO_0004339	Neale B	UKBB	European	2017	0.01073	0.001914	2.064e-08	+	336474	0	336474	1	IVNT	Neale-B_UKBB_EUR_2017
rs921943	rs921943	chr5:78316476	chr5:79020653	T	C	rs921943	chr5:78316476	chr5:79020653	T	C	0	1	1	Sitting height	EFO_0004339	Neale B	UKBB	European	2017	0.01241	0.002082	2.53e-09	+	336172	0	336172	1	IVNT	Neale-B_UKBB_EUR_2017
rs921943	rs921943	chr5:78316476	chr5:79020653	T	C	rs2034900	chr5:78315964	chr5:79020141	A	G	1	1	1	Comparative height size at age 10	-	Neale B	UKBB	European	2017	0.009133	0.001838	6.757e-07	+	332021	0	332021	1	-	Neale-B_UKBB_EUR_2017
rs921943	rs921943	chr5:78316476	chr5:79020653	T	C	rs2034900	chr5:78315964	chr5:79020141	A	G	1	1	1	Height	EFO_0004339	Neale B	UKBB	European	2017	0.01067	0.001913	2.433e-08	+	336474	0	336474	1	IVNT	Neale-B_UKBB_EUR_2017
rs921943	rs921943	chr5:78316476	chr5:79020653	T	C	rs2034900	chr5:78315964	chr5:79020141	A	G	1	1	1	Sitting height	EFO_0004339	Neale B	UKBB	European	2017	0.01238	0.002081	2.708e-09	+	336172	0	336172	1	IVNT	Neale-B_UKBB_EUR_2017
rs921943	rs921943	chr5:78316476	chr5:79020653	T	C	rs2034899	chr5:78316188	chr5:79020365	G	T	1	1	1	Comparative height size at age 10	-	Neale B	UKBB	European	2017	0.009122	0.001838	6.994e-07	+	332021	0	332021	1	-	Neale-B_UKBB_EUR_2017
rs921943	rs921943	chr5:78316476	chr5:79020653	T	C	rs2034899	chr5:78316188	chr5:79020365	G	T	1	1	1	Height	EFO_0004339	Neale B	UKBB	European	2017	0.01072	0.001914	2.111e-08	+	336474	0	336474	1	IVNT	Neale-B_UKBB_EUR_2017
rs921943	rs921943	chr5:78316476	chr5:79020653	T	C	rs2034899	chr5:78316188	chr5:79020365	G	T	1	1	1	Leg fat-free mass right	-	Neale B	UKBB	European	2017	0.007834	0.001773	9.897e-06	+	331285	0	331285	1	IVNT	Neale-B_UKBB_EUR_2017
rs921943	rs921943	chr5:78316476	chr5:79020653	T	C	rs2034899	chr5:78316188	chr5:79020365	G	T	1	1	1	Leg predicted mass left	-	Neale B	UKBB	European	2017	0.007786	0.001761	9.833e-06	+	331253	0	331253	1	IVNT	Neale-B_UKBB_EUR_2017
rs921943	rs921943	chr5:78316476	chr5:79020653	T	C	rs2034899	chr5:78316188	chr5:79020365	G	T	1	1	1	Sitting height	EFO_0004339	Neale B	UKBB	European	2017	0.01235	0.002082	3.028e-09	+	336172	0	336172	1	IVNT	Neale-B_UKBB_EUR_2017
rs921943	rs921943	chr5:78316476	chr5:79020653	T	C	rs2364143	chr5:78316227	chr5:79020404	C	A	1	1	1	Comparative height size at age 10	-	Neale B	UKBB	European	2017	0.009165	0.001838	6.165e-07	+	332021	0	332021	1	-	Neale-B_UKBB_EUR_2017
rs921943	rs921943	chr5:78316476	chr5:79020653	T	C	rs2364143	chr5:78316227	chr5:79020404	C	A	1	1	1	Height	EFO_0004339	Neale B	UKBB	European	2017	0.01069	0.001913	2.304e-08	+	336474	0	336474	1	IVNT	Neale-B_UKBB_EUR_2017
rs921943	rs921943	chr5:78316476	chr5:79020653	T	C	rs2364143	chr5:78316227	chr5:79020404	C	A	1	1	1	Sitting height	EFO_0004339	Neale B	UKBB	European	2017	0.01237	0.002081	2.76e-09	+	336172	0	336172	1	IVNT	Neale-B_UKBB_EUR_2017
rs921943	rs921943	chr5:78316476	chr5:79020653	T	C	rs731124	chr5:78317413	chr5:79021590	T	C	1	1	1	Comparative height size at age 10	-	Neale B	UKBB	European	2017	0.00916	0.001838	6.277e-07	+	332021	0	332021	1	-	Neale-B_UKBB_EUR_2017
rs921943	rs921943	chr5:78316476	chr5:79020653	T	C	rs731124	chr5:78317413	chr5:79021590	T	C	1	1	1	Height	EFO_0004339	Neale B	UKBB	European	2017	0.01074	0.001913	1.977e-08	+	336474	0	336474	1	IVNT	Neale-B_UKBB_EUR_2017
rs921943	rs921943	chr5:78316476	chr5:79020653	T	C	rs731124	chr5:78317413	chr5:79021590	T	C	1	1	1	Sitting height	EFO_0004339	Neale B	UKBB	European	2017	0.01245	0.002082	2.235e-09	+	336172	0	336172	1	IVNT	Neale-B_UKBB_EUR_2017
rs667707	rs667707	chr10:103063437	chr10:101303680	C	T	rs667707	chr10:103063437	chr10:101303680	C	T	0	1	1	Mean corpuscular volume	EFO_0004586	Astle W	27863252	European	2016	-0.01752	0.00389	6.701e-06	-	173480	0	173480	2	IVNT	Astle-W_Blood-Cell-Traits_EUR_2016
rs667707	rs667707	chr10:103063437	chr10:101303680	C	T	rs633504	chr10:103065056	chr10:101305299	C	G	1	0.91976	1	Mean corpuscular volume	EFO_0004586	Astle W	27863252	European	2016	-0.01818	0.003937	3.869e-06	-	173480	0	173480	2	IVNT	Astle-W_Blood-Cell-Traits_EUR_2016
rs667707	rs667707	chr10:103063437	chr10:101303680	C	T	rs589433	chr10:103066248	chr10:101306491	G	A	1	0.91976	1	Mean corpuscular volume	EFO_0004586	Astle W	27863252	European	2016	-0.01817	0.003932	3.825e-06	-	173480	0	173480	2	IVNT	Astle-W_Blood-Cell-Traits_EUR_2016
rs667707	rs667707	chr10:103063437	chr10:101303680	C	T	rs619654	chr10:103065938	chr10:101306181	C	T	1	0.91543	1	Mean corpuscular volume	EFO_0004586	Astle W	27863252	European	2016	-0.01809	0.003932	4.195e-06	-	173480	0	173480	2	IVNT	Astle-W_Blood-Cell-Traits_EUR_2016
rs667707	rs667707	chr10:103063437	chr10:101303680	C	T	rs619737	chr10:103065885	chr10:101306128	T	C	1	0.85596	1	Mean corpuscular hemoglobin	EFO_0004586	Astle W	27863252	European	2016	-0.01861	0.004006	3.395e-06	-	173480	0	173480	2	IVNT	Astle-W_Blood-Cell-Traits_EUR_2016
rs667707	rs667707	chr10:103063437	chr10:101303680	C	T	rs619737	chr10:103065885	chr10:101306128	T	C	1	0.85596	1	Mean corpuscular volume	EFO_0004586	Astle W	27863252	European	2016	-0.01954	0.003994	9.93e-07	-	173480	0	173480	2	IVNT	Astle-W_Blood-Cell-Traits_EUR_2016
rs12951643	rs12951643	chr17:46582018	chr17:48504656	A	G	rs12951643	chr17:46582018	chr17:48504656	A	G	0	1	1	Mouth or teeth dental problems: dentures	-	Neale B	UKBB	European	2017	0.007346	0.001637	7.225e-06	+	336138	56894	279244	1	risk diff	Neale-B_UKBB_EUR_2017
rs12951643	rs12951643	chr17:46582018	chr17:48504656	A	G	rs12951643	chr17:46582018	chr17:48504656	A	G	0	1	1	Systolic blood pressure	EFO_0006335	Neale B	UKBB	European	2017	-0.02211	0.004413	5.41e-07	-	317754	0	317754	1	IVNT	Neale-B_UKBB_EUR_2017
rs12951643	rs12951643	chr17:46582018	chr17:48504656	A	G	rs56315233	chr17:46571866	chr17:48494504	C	T	1	1	1	Mouth or teeth dental problems: dentures	-	Neale B	UKBB	European	2017	0.007402	0.001632	5.756e-06	+	336138	56894	279244	1	risk diff	Neale-B_UKBB_EUR_2017
rs12951643	rs12951643	chr17:46582018	chr17:48504656	A	G	rs56315233	chr17:46571866	chr17:48494504	C	T	1	1	1	Systolic blood pressure	EFO_0006335	Neale B	UKBB	European	2017	-0.02209	0.004399	5.142e-07	-	317754	0	317754	1	IVNT	Neale-B_UKBB_EUR_2017
rs12951643	rs12951643	chr17:46582018	chr17:48504656	A	G	rs112441102	chr17:46577027	chr17:48499665	G	T	1	1	1	Mouth or teeth dental problems: dentures	-	Neale B	UKBB	European	2017	0.007301	0.001637	8.184e-06	+	336138	56894	279244	1	risk diff	Neale-B_UKBB_EUR_2017
rs12951643	rs12951643	chr17:46582018	chr17:48504656	A	G	rs112441102	chr17:46577027	chr17:48499665	G	T	1	1	1	Systolic blood pressure	EFO_0006335	Neale B	UKBB	European	2017	-0.02229	0.004411	4.337e-07	-	317754	0	317754	1	IVNT	Neale-B_UKBB_EUR_2017
rs12951643	rs12951643	chr17:46582018	chr17:48504656	A	G	rs36087615	chr17:46582904	chr17:48505542	G	A	1	1	1	Mouth or teeth dental problems: dentures	-	Neale B	UKBB	European	2017	0.007363	0.001637	6.878e-06	+	336138	56894	279244	1	risk diff	Neale-B_UKBB_EUR_2017
rs12951643	rs12951643	chr17:46582018	chr17:48504656	A	G	rs36087615	chr17:46582904	chr17:48505542	G	A	1	1	1	Systolic blood pressure	EFO_0006335	Neale B	UKBB	European	2017	-0.02198	0.004412	6.281e-07	-	317754	0	317754	1	IVNT	Neale-B_UKBB_EUR_2017
rs12951643	rs12951643	chr17:46582018	chr17:48504656	A	G	rs56238990	chr17:46583975	chr17:48506613	A	T	1	1	1	Mouth or teeth dental problems: dentures	-	Neale B	UKBB	European	2017	0.007322	0.001637	7.747e-06	+	336138	56894	279244	1	risk diff	Neale-B_UKBB_EUR_2017
rs12951643	rs12951643	chr17:46582018	chr17:48504656	A	G	rs56238990	chr17:46583975	chr17:48506613	A	T	1	1	1	Systolic blood pressure	EFO_0006335	Neale B	UKBB	European	2017	-0.02217	0.004412	5.062e-07	-	317754	0	317754	1	IVNT	Neale-B_UKBB_EUR_2017
rs9309294	rs9309294	chr2:57389998	chr2:57162863	A	G	rs7562542	chr2:57388379	chr2:57161244	G	A	1	0.98371	1	Body mass index adjusted for smoking in females	EFO_0004340	GIANT	28443625	Mixed	2017	0.0232	0.0049	2.359e-06	+	102938	0	102938	73	IVNT	GIANT_BMI-adjusted-Smoking-F_Mixed_2017
rs7700970	rs7700970	chr5:78411324	chr5:79115501	C	T	rs7700970	chr5:78411324	chr5:79115501	C	T	0	1	1	Selenium levels	CHEBI_27568	Evans DM	23720494	European	2013	NA	NA	1.72e-18	NA	2603	-	-	-	-	GRASP
rs7700970	rs7700970	chr5:78411324	chr5:79115501	C	T	rs7700970	chr5:78411324	chr5:79115501	C	T	0	1	1	Toenail selenium levels	EFO_0006331	Cornelis MC	25343990	European	2014	-0.03	0.004474	2e-11	-	-	-	-	-	unit increase	NHGRI-EBI_GWAS_Catalog
rs10475981	rs10475981	chr5:170952630	chr5:171525626	A	C	rs10475981	chr5:170952630	chr5:171525626	A	C	0	1	1	Cause of death: without complications	-	Neale B	UKBB	European	2017	0.008927	0.001955	5.046e-06	+	7637	6	7631	1	risk diff	Neale-B_UKBB_EUR_2017
rs10475981	rs10475981	chr5:170952630	chr5:171525626	A	C	rs28680538	chr5:170961351	chr5:171534347	A	G	1	1	1	Cause of death: without complications	-	Neale B	UKBB	European	2017	0.00931	0.001994	3.085e-06	+	7637	6	7631	1	risk diff	Neale-B_UKBB_EUR_2017
rs10475981	rs10475981	chr5:170952630	chr5:171525626	A	C	rs6863754	chr5:170961655	chr5:171534651	A	C	1	1	1	Cause of death: without complications	-	Neale B	UKBB	European	2017	0.008604	0.001924	7.878e-06	+	7637	6	7631	1	risk diff	Neale-B_UKBB_EUR_2017
rs10475981	rs10475981	chr5:170952630	chr5:171525626	A	C	rs73800825	chr5:170958191	chr5:171531187	A	G	1	0.92764	1	Cause of death: without complications	-	Neale B	UKBB	European	2017	0.009425	0.002005	2.628e-06	+	7637	6	7631	1	risk diff	Neale-B_UKBB_EUR_2017
rs10475981	rs10475981	chr5:170952630	chr5:171525626	A	C	rs10062137	chr5:170962659	chr5:171535655	C	T	1	0.92764	1	Cause of death: without complications	-	Neale B	UKBB	European	2017	0.009488	0.00201	2.394e-06	+	7637	6	7631	1	risk diff	Neale-B_UKBB_EUR_2017
rs7163368	rs7163368	chr15:63571121	chr15:63278922	C	T	rs7163368	chr15:63571121	chr15:63278922	C	T	0	1	1	Reticulocyte count	EFO_0004586	Astle W	27863252	European	2016	0.02002	0.004378	4.799e-06	+	173480	0	173480	2	IVNT	Astle-W_Blood-Cell-Traits_EUR_2016
rs7163368	rs7163368	chr15:63571121	chr15:63278922	C	T	rs7163368	chr15:63571121	chr15:63278922	C	T	0	1	1	Cause of death: heart failure, unspecified	EFO_0003144;EFO_0000373	Neale B	UKBB	European	2017	0.002952	0.0006414	4.232e-06	+	7637	8	7629	1	risk diff	Neale-B_UKBB_EUR_2017
rs7163368	rs7163368	chr15:63571121	chr15:63278922	C	T	rs7162310	chr15:63571234	chr15:63279035	T	C	1	1	1	Reticulocyte count	EFO_0004586	Astle W	27863252	European	2016	0.01985	0.004383	5.934e-06	+	173480	0	173480	2	IVNT	Astle-W_Blood-Cell-Traits_EUR_2016
rs7163368	rs7163368	chr15:63571121	chr15:63278922	C	T	rs7162310	chr15:63571234	chr15:63279035	T	C	1	1	1	Myopia	HP_0000545	Pickrell JK	27182965	European	2016	NA	NA	2e-11	NA	-	-	-	-	-	NHGRI-EBI_GWAS_Catalog
rs7163368	rs7163368	chr15:63571121	chr15:63278922	C	T	rs7162310	chr15:63571234	chr15:63279035	T	C	1	1	1	Cause of death: heart failure, unspecified	EFO_0003144;EFO_0000373	Neale B	UKBB	European	2017	0.002952	0.0006414	4.231e-06	+	7637	8	7629	1	risk diff	Neale-B_UKBB_EUR_2017
rs7163368	rs7163368	chr15:63571121	chr15:63278922	C	T	rs12899503	chr15:63574572	chr15:63282373	C	T	1	0.9781	1	Reticulocyte count	EFO_0004586	Astle W	27863252	European	2016	0.02073	0.004411	2.616e-06	+	173480	0	173480	2	IVNT	Astle-W_Blood-Cell-Traits_EUR_2016
rs7163368	rs7163368	chr15:63571121	chr15:63278922	C	T	rs12899503	chr15:63574572	chr15:63282373	C	T	1	0.9781	1	Cause of death: heart failure, unspecified	EFO_0003144;EFO_0000373	Neale B	UKBB	European	2017	0.003019	0.0006456	2.977e-06	+	7637	8	7629	1	risk diff	Neale-B_UKBB_EUR_2017
rs7163368	rs7163368	chr15:63571121	chr15:63278922	C	T	rs12898755	chr15:63574641	chr15:63282442	A	G	1	0.9781	1	Reticulocyte count	EFO_0004586	Astle W	27863252	European	2016	0.02065	0.004412	2.88e-06	+	173480	0	173480	2	IVNT	Astle-W_Blood-Cell-Traits_EUR_2016
rs7163368	rs7163368	chr15:63571121	chr15:63278922	C	T	rs12898755	chr15:63574641	chr15:63282442	A	G	1	0.9781	1	Cause of death: heart failure, unspecified	EFO_0003144;EFO_0000373	Neale B	UKBB	European	2017	0.003015	0.0006455	3.054e-06	+	7637	8	7629	1	risk diff	Neale-B_UKBB_EUR_2017
rs3785832	rs3785832	chr17:59538794	chr17:61461433	T	C	rs3785832	chr17:59538794	chr17:61461433	T	C	0	1	1	Height	EFO_0004339	Neale B	UKBB	European	2017	-0.008531	0.001763	1.316e-06	-	336474	0	336474	1	IVNT	Neale-B_UKBB_EUR_2017
rs3785832	rs3785832	chr17:59538794	chr17:61461433	T	C	rs3785833	chr17:59538663	chr17:61461302	C	T	1	0.85974	1	Height	EFO_0004339	Neale B	UKBB	European	2017	-0.008614	0.001778	1.268e-06	-	336474	0	336474	1	IVNT	Neale-B_UKBB_EUR_2017
rs3785832	rs3785832	chr17:59538794	chr17:61461433	T	C	rs9912305	chr17:59535965	chr17:61458604	G	C	1	0.8475	0.98651	Height	EFO_0004339	Neale B	UKBB	European	2017	-0.009917	0.001777	2.41e-08	-	336474	0	336474	1	IVNT	Neale-B_UKBB_EUR_2017
rs7569234	rs7569234	chr2:16552963	chr2:16371695	C	T	rs7569234	chr2:16552963	chr2:16371695	C	T	0	1	1	Cause of death: other specified respiratory disorders	-	Neale B	UKBB	European	2017	0.008294	0.001524	5.465e-08	+	7637	4	7633	1	risk diff	Neale-B_UKBB_EUR_2017
rs7569234	rs7569234	chr2:16552963	chr2:16371695	C	T	rs73203780	chr2:16553511	chr2:16372243	G	A	1	0.96568	1	Cause of death: other specified respiratory disorders	-	Neale B	UKBB	European	2017	0.008143	0.001512	7.378e-08	+	7637	4	7633	1	risk diff	Neale-B_UKBB_EUR_2017
rs7569234	rs7569234	chr2:16552963	chr2:16371695	C	T	rs13398281	chr2:16554235	chr2:16372967	C	T	1	0.87226	0.96557	Cause of death: other specified respiratory disorders	-	Neale B	UKBB	European	2017	0.007181	0.001426	4.914e-07	+	7637	4	7633	1	risk diff	Neale-B_UKBB_EUR_2017
rs4333127	rs4333127	chr4:5930033	chr4:5928306	A	G	rs4333127	chr4:5930033	chr4:5928306	A	G	0	1	1	Zinc levels	-	Evans DM	23720494	European	2013	NA	NA	3e-06	NA	2603	-	-	-	-	GRASP
rs4333127	rs4333127	chr4:5930033	chr4:5928306	A	G	rs4333127	chr4:5930033	chr4:5928306	A	G	0	1	1	Blood trace element Zn levels	EFO_0005268	Evans DM	23720494	European	2013	NA	NA	3e-06	NA	-	-	-	-	-	NHGRI-EBI_GWAS_Catalog
rs17511001	rs17511001	chr4:109433358	chr4:108512202	A	G	rs17511001	chr4:109433358	chr4:108512202	A	G	0	1	1	Height	EFO_0004339	GIANT	23754948	European	2013	0.02085	0.004621	6.451e-06	+	133650	0	133650	46	Z-score	GIANT_Height_EUR_2013
rs17511001	rs17511001	chr4:109433358	chr4:108512202	A	G	rs17511001	chr4:109433358	chr4:108512202	A	G	0	1	1	Height	EFO_0004339	GIANT	25282103	European	2014	0.025	0.0032	9.9e-15	+	252900	0	252900	79	Z-score	GIANT_Height_EUR_2014
rs17511001	rs17511001	chr4:109433358	chr4:108512202	A	G	rs17511001	chr4:109433358	chr4:108512202	A	G	0	1	1	Comparative height size at age 10	-	Neale B	UKBB	European	2017	0.009623	0.001816	1.17e-07	+	332021	0	332021	1	-	Neale-B_UKBB_EUR_2017
rs17511001	rs17511001	chr4:109433358	chr4:108512202	A	G	rs17511001	chr4:109433358	chr4:108512202	A	G	0	1	1	Height	EFO_0004339	Neale B	UKBB	European	2017	0.015	0.00189	2.121e-15	+	336474	0	336474	1	IVNT	Neale-B_UKBB_EUR_2017
rs17511001	rs17511001	chr4:109433358	chr4:108512202	A	G	rs17511001	chr4:109433358	chr4:108512202	A	G	0	1	1	Sitting height	EFO_0004339	Neale B	UKBB	European	2017	0.01086	0.002056	1.273e-07	+	336172	0	336172	1	IVNT	Neale-B_UKBB_EUR_2017
rs17511001	rs17511001	chr4:109433358	chr4:108512202	A	G	rs74564128	chr4:109415818	chr4:108494662	G	A	1	1	1	Comparative height size at age 10	-	Neale B	UKBB	European	2017	0.009586	0.001816	1.298e-07	+	332021	0	332021	1	-	Neale-B_UKBB_EUR_2017
rs17511001	rs17511001	chr4:109433358	chr4:108512202	A	G	rs74564128	chr4:109415818	chr4:108494662	G	A	1	1	1	Height	EFO_0004339	Neale B	UKBB	European	2017	0.01498	0.00189	2.237e-15	+	336474	0	336474	1	IVNT	Neale-B_UKBB_EUR_2017
rs17511001	rs17511001	chr4:109433358	chr4:108512202	A	G	rs74564128	chr4:109415818	chr4:108494662	G	A	1	1	1	Sitting height	EFO_0004339	Neale B	UKBB	European	2017	0.01098	0.002056	9.272e-08	+	336172	0	336172	1	IVNT	Neale-B_UKBB_EUR_2017
rs17511001	rs17511001	chr4:109433358	chr4:108512202	A	G	rs2343832	chr4:109432175	chr4:108511019	A	G	1	1	1	Height	EFO_0004339	GIANT	23754948	European	2013	0.02085	0.004621	6.451e-06	+	133650	0	133650	46	Z-score	GIANT_Height_EUR_2013
rs17511001	rs17511001	chr4:109433358	chr4:108512202	A	G	rs2343832	chr4:109432175	chr4:108511019	A	G	1	1	1	Height	EFO_0004339	GIANT	25282103	European	2014	0.025	0.0032	7.7e-15	+	252918	0	252918	79	Z-score	GIANT_Height_EUR_2014
rs17511001	rs17511001	chr4:109433358	chr4:108512202	A	G	rs2343832	chr4:109432175	chr4:108511019	A	G	1	1	1	Comparative height size at age 10	-	Neale B	UKBB	European	2017	0.009649	0.001816	1.073e-07	+	332021	0	332021	1	-	Neale-B_UKBB_EUR_2017
rs17511001	rs17511001	chr4:109433358	chr4:108512202	A	G	rs2343832	chr4:109432175	chr4:108511019	A	G	1	1	1	Height	EFO_0004339	Neale B	UKBB	European	2017	0.01505	0.00189	1.698e-15	+	336474	0	336474	1	IVNT	Neale-B_UKBB_EUR_2017
rs17511001	rs17511001	chr4:109433358	chr4:108512202	A	G	rs2343832	chr4:109432175	chr4:108511019	A	G	1	1	1	Sitting height	EFO_0004339	Neale B	UKBB	European	2017	0.01087	0.002056	1.227e-07	+	336172	0	336172	1	IVNT	Neale-B_UKBB_EUR_2017
rs17511001	rs17511001	chr4:109433358	chr4:108512202	A	G	rs62316358	chr4:109432522	chr4:108511366	G	A	1	1	1	Comparative height size at age 10	-	Neale B	UKBB	European	2017	0.00958	0.001816	1.323e-07	+	332021	0	332021	1	-	Neale-B_UKBB_EUR_2017
rs17511001	rs17511001	chr4:109433358	chr4:108512202	A	G	rs62316358	chr4:109432522	chr4:108511366	G	A	1	1	1	Height	EFO_0004339	Neale B	UKBB	European	2017	0.01498	0.00189	2.302e-15	+	336474	0	336474	1	IVNT	Neale-B_UKBB_EUR_2017
rs17511001	rs17511001	chr4:109433358	chr4:108512202	A	G	rs62316358	chr4:109432522	chr4:108511366	G	A	1	1	1	Sitting height	EFO_0004339	Neale B	UKBB	European	2017	0.01087	0.002056	1.237e-07	+	336172	0	336172	1	IVNT	Neale-B_UKBB_EUR_2017
rs17511001	rs17511001	chr4:109433358	chr4:108512202	A	G	rs11935268	chr4:109432963	chr4:108511807	T	G	1	1	1	Height	EFO_0004339	GIANT	23754948	European	2013	0.02085	0.004621	6.451e-06	+	133650	0	133650	46	Z-score	GIANT_Height_EUR_2013
rs17511001	rs17511001	chr4:109433358	chr4:108512202	A	G	rs11935268	chr4:109432963	chr4:108511807	T	G	1	1	1	Height	EFO_0004339	GIANT	25282103	European	2014	0.025	0.0032	1.5e-14	+	252919	0	252919	79	Z-score	GIANT_Height_EUR_2014
rs17511001	rs17511001	chr4:109433358	chr4:108512202	A	G	rs11935268	chr4:109432963	chr4:108511807	T	G	1	1	1	Comparative height size at age 10	-	Neale B	UKBB	European	2017	0.009586	0.001816	1.303e-07	+	332021	0	332021	1	-	Neale-B_UKBB_EUR_2017
rs17511001	rs17511001	chr4:109433358	chr4:108512202	A	G	rs11935268	chr4:109432963	chr4:108511807	T	G	1	1	1	Height	EFO_0004339	Neale B	UKBB	European	2017	0.015	0.00189	2.118e-15	+	336474	0	336474	1	IVNT	Neale-B_UKBB_EUR_2017
rs17511001	rs17511001	chr4:109433358	chr4:108512202	A	G	rs11935268	chr4:109432963	chr4:108511807	T	G	1	1	1	Sitting height	EFO_0004339	Neale B	UKBB	European	2017	0.0109	0.002056	1.165e-07	+	336172	0	336172	1	IVNT	Neale-B_UKBB_EUR_2017
rs11763353	rs11763353	chr7:15630871	chr7:15591246	A	G	rs11763353	chr7:15630871	chr7:15591246	A	G	0	1	1	Zinc levels	-	Evans DM	23720494	European	2013	NA	NA	6.9e-07	NA	2603	-	-	-	-	GRASP
rs11763353	rs11763353	chr7:15630871	chr7:15591246	A	G	rs11763353	chr7:15630871	chr7:15591246	A	G	0	1	1	Blood trace element Zn levels	EFO_0005268	Evans DM	23720494	European	2013	NA	NA	7e-07	NA	-	-	-	-	-	NHGRI-EBI_GWAS_Catalog
rs11232535	rs11232535	chr11:80928809	chr11:81217766	C	T	rs11232535	chr11:80928809	chr11:81217766	C	T	0	1	1	Zinc levels	-	Evans DM	23720494	European	2013	NA	NA	6.73e-07	NA	2603	-	-	-	-	GRASP
rs11232535	rs11232535	chr11:80928809	chr11:81217766	C	T	rs11232535	chr11:80928809	chr11:81217766	C	T	0	1	1	Blood trace element Zn levels	EFO_0005268	Evans DM	23720494	European	2013	NA	NA	7e-07	NA	-	-	-	-	-	NHGRI-EBI_GWAS_Catalog
rs7148590	rs7148590	chr14:65473196	chr14:65006478	A	G	rs7148590	chr14:65473196	chr14:65006478	A	G	0	1	1	Mean corpuscular hemoglobin	EFO_0004586	Astle W	27863252	European	2016	0.06015	0.003554	2.854e-64	+	173480	0	173480	2	IVNT	Astle-W_Blood-Cell-Traits_EUR_2016
rs7148590	rs7148590	chr14:65473196	chr14:65006478	A	G	rs7148590	chr14:65473196	chr14:65006478	A	G	0	1	1	Mean corpuscular hemoglobin concentration	EFO_0004586	Astle W	27863252	European	2016	0.03474	0.003475	1.581e-23	+	173480	0	173480	2	IVNT	Astle-W_Blood-Cell-Traits_EUR_2016
rs7148590	rs7148590	chr14:65473196	chr14:65006478	A	G	rs7148590	chr14:65473196	chr14:65006478	A	G	0	1	1	Mean corpuscular volume	EFO_0004586	Astle W	27863252	European	2016	0.04962	0.003544	1.504e-44	+	173480	0	173480	2	IVNT	Astle-W_Blood-Cell-Traits_EUR_2016
rs7148590	rs7148590	chr14:65473196	chr14:65006478	A	G	rs7148590	chr14:65473196	chr14:65006478	A	G	0	1	1	Mean platelet volume	EFO_0004586	Astle W	27863252	European	2016	-0.02042	0.003635	1.925e-08	-	173480	0	173480	2	IVNT	Astle-W_Blood-Cell-Traits_EUR_2016
rs7148590	rs7148590	chr14:65473196	chr14:65006478	A	G	rs7148590	chr14:65473196	chr14:65006478	A	G	0	1	1	Platelet count	EFO_0004586	Astle W	27863252	European	2016	0.02197	0.003662	1.964e-09	+	173480	0	173480	2	IVNT	Astle-W_Blood-Cell-Traits_EUR_2016
rs7148590	rs7148590	chr14:65473196	chr14:65006478	A	G	rs7148590	chr14:65473196	chr14:65006478	A	G	0	1	1	Red blood cell count	EFO_0004586	Astle W	27863252	European	2016	-0.02654	0.003571	1.072e-13	-	173480	0	173480	2	IVNT	Astle-W_Blood-Cell-Traits_EUR_2016
rs7148590	rs7148590	chr14:65473196	chr14:65006478	A	G	rs7148590	chr14:65473196	chr14:65006478	A	G	0	1	1	Mean corpuscular hemoglobin concentration	EFO_0004528	van der Harst P	23222517	Mixed	2012	NA	NA	2.79e-11	NA	71861	-	-	-	-	GRASP
rs7148590	rs7148590	chr14:65473196	chr14:65006478	A	G	rs7148590	chr14:65473196	chr14:65006478	A	G	0	1	1	Mean corpuscular volume	EFO_0004526	Ganesh SK	19862010	European	2009	NA	NA	1.29e-08	NA	24167	-	-	-	-	GRASP
rs7148590	rs7148590	chr14:65473196	chr14:65006478	A	G	rs7148590	chr14:65473196	chr14:65006478	A	G	0	1	1	Mean corpuscular volume	EFO_0004526	van der Harst P	23222517	Mixed	2012	NA	NA	6.03e-08	NA	71861	-	-	-	-	GRASP
rs7148590	rs7148590	chr14:65473196	chr14:65006478	A	G	rs7148590	chr14:65473196	chr14:65006478	A	G	0	1	1	Zinc levels	-	Evans DM	23720494	European	2013	NA	NA	1.37e-07	NA	2603	-	-	-	-	GRASP
rs7148590	rs7148590	chr14:65473196	chr14:65006478	A	G	rs7148590	chr14:65473196	chr14:65006478	A	G	0	1	1	Blood trace element Zn levels	EFO_0005268	Evans DM	23720494	European	2013	NA	NA	1e-07	NA	-	-	-	-	-	NHGRI-EBI_GWAS_Catalog
rs7148590	rs7148590	chr14:65473196	chr14:65006478	A	G	rs7148590	chr14:65473196	chr14:65006478	A	G	0	1	1	Comparative height size at age 10	-	Neale B	UKBB	European	2017	-0.01011	0.001661	1.147e-09	-	332021	0	332021	1	-	Neale-B_UKBB_EUR_2017
rs7148590	rs7148590	chr14:65473196	chr14:65006478	A	G	rs7148590	chr14:65473196	chr14:65006478	A	G	0	1	1	Hand grip strength left	EFO_0006941	Neale B	UKBB	European	2017	-0.00878	0.001755	5.627e-07	-	335821	0	335821	1	IVNT	Neale-B_UKBB_EUR_2017
rs7148590	rs7148590	chr14:65473196	chr14:65006478	A	G	rs7148590	chr14:65473196	chr14:65006478	A	G	0	1	1	Hand grip strength right	EFO_0006941	Neale B	UKBB	European	2017	-0.008792	0.001758	5.704e-07	-	335842	0	335842	1	IVNT	Neale-B_UKBB_EUR_2017
rs7148590	rs7148590	chr14:65473196	chr14:65006478	A	G	rs7148590	chr14:65473196	chr14:65006478	A	G	0	1	1	Height	EFO_0004339	Neale B	UKBB	European	2017	-0.01448	0.001729	5.535e-17	-	336474	0	336474	1	IVNT	Neale-B_UKBB_EUR_2017
rs7148590	rs7148590	chr14:65473196	chr14:65006478	A	G	rs7148590	chr14:65473196	chr14:65006478	A	G	0	1	1	Sitting height	EFO_0004339	Neale B	UKBB	European	2017	-0.01233	0.001881	5.583e-11	-	336172	0	336172	1	IVNT	Neale-B_UKBB_EUR_2017
rs7148590	rs7148590	chr14:65473196	chr14:65006478	A	G	rs7148590	chr14:65473196	chr14:65006478	A	G	0	1	1	Trunk fat-free mass	-	Neale B	UKBB	European	2017	-0.008148	0.001533	1.067e-07	-	331030	0	331030	1	IVNT	Neale-B_UKBB_EUR_2017
rs7148590	rs7148590	chr14:65473196	chr14:65006478	A	G	rs7148590	chr14:65473196	chr14:65006478	A	G	0	1	1	Trunk predicted mass	-	Neale B	UKBB	European	2017	-0.007975	0.001528	1.798e-07	-	330995	0	330995	1	IVNT	Neale-B_UKBB_EUR_2017
rs7148590	rs7148590	chr14:65473196	chr14:65006478	A	G	rs7148590	chr14:65473196	chr14:65006478	A	G	0	1	1	Whole body fat-free mass	-	Neale B	UKBB	European	2017	-0.007217	0.001539	2.746e-06	-	331291	0	331291	1	IVNT	Neale-B_UKBB_EUR_2017
rs7148590	rs7148590	chr14:65473196	chr14:65006478	A	G	rs7148590	chr14:65473196	chr14:65006478	A	G	0	1	1	Whole body water mass	-	Neale B	UKBB	European	2017	-0.006958	0.001541	6.346e-06	-	331315	0	331315	1	IVNT	Neale-B_UKBB_EUR_2017
rs7148590	rs7148590	chr14:65473196	chr14:65006478	A	G	rs4586342	chr14:65473875	chr14:65007157	C	G	1	0.99602	1	Mean corpuscular hemoglobin	EFO_0004586	Astle W	27863252	European	2016	0.06062	0.003558	4.215e-65	+	173480	0	173480	2	IVNT	Astle-W_Blood-Cell-Traits_EUR_2016
rs7148590	rs7148590	chr14:65473196	chr14:65006478	A	G	rs4586342	chr14:65473875	chr14:65007157	C	G	1	0.99602	1	Mean corpuscular hemoglobin concentration	EFO_0004586	Astle W	27863252	European	2016	0.03478	0.003479	1.581e-23	+	173480	0	173480	2	IVNT	Astle-W_Blood-Cell-Traits_EUR_2016
rs7148590	rs7148590	chr14:65473196	chr14:65006478	A	G	rs4586342	chr14:65473875	chr14:65007157	C	G	1	0.99602	1	Mean corpuscular volume	EFO_0004586	Astle W	27863252	European	2016	0.05011	0.003548	2.706e-45	+	173480	0	173480	2	IVNT	Astle-W_Blood-Cell-Traits_EUR_2016
rs7148590	rs7148590	chr14:65473196	chr14:65006478	A	G	rs4586342	chr14:65473875	chr14:65007157	C	G	1	0.99602	1	Mean platelet volume	EFO_0004586	Astle W	27863252	European	2016	-0.02029	0.003639	2.475e-08	-	173480	0	173480	2	IVNT	Astle-W_Blood-Cell-Traits_EUR_2016
rs7148590	rs7148590	chr14:65473196	chr14:65006478	A	G	rs4586342	chr14:65473875	chr14:65007157	C	G	1	0.99602	1	Platelet count	EFO_0004586	Astle W	27863252	European	2016	0.02213	0.003666	1.573e-09	+	173480	0	173480	2	IVNT	Astle-W_Blood-Cell-Traits_EUR_2016
rs7148590	rs7148590	chr14:65473196	chr14:65006478	A	G	rs4586342	chr14:65473875	chr14:65007157	C	G	1	0.99602	1	Red blood cell count	EFO_0004586	Astle W	27863252	European	2016	-0.02699	0.003576	4.45e-14	-	173480	0	173480	2	IVNT	Astle-W_Blood-Cell-Traits_EUR_2016
rs7148590	rs7148590	chr14:65473196	chr14:65006478	A	G	rs4586342	chr14:65473875	chr14:65007157	C	G	1	0.99602	1	Mean corpuscular hemoglobin concentration	EFO_0004528	van der Harst P	23222517	Mixed	2012	NA	NA	1.81e-10	NA	71861	-	-	-	-	GRASP
rs7148590	rs7148590	chr14:65473196	chr14:65006478	A	G	rs4586342	chr14:65473875	chr14:65007157	C	G	1	0.99602	1	Mean corpuscular volume	EFO_0004526	van der Harst P	23222517	Mixed	2012	NA	NA	6.2e-07	NA	71861	-	-	-	-	GRASP
rs7148590	rs7148590	chr14:65473196	chr14:65006478	A	G	rs4586342	chr14:65473875	chr14:65007157	C	G	1	0.99602	1	Comparative height size at age 10	-	Neale B	UKBB	European	2017	-0.009976	0.00166	1.844e-09	-	332021	0	332021	1	-	Neale-B_UKBB_EUR_2017
rs7148590	rs7148590	chr14:65473196	chr14:65006478	A	G	rs4586342	chr14:65473875	chr14:65007157	C	G	1	0.99602	1	Hand grip strength left	EFO_0006941	Neale B	UKBB	European	2017	-0.008636	0.001753	8.385e-07	-	335821	0	335821	1	IVNT	Neale-B_UKBB_EUR_2017
rs7148590	rs7148590	chr14:65473196	chr14:65006478	A	G	rs4586342	chr14:65473875	chr14:65007157	C	G	1	0.99602	1	Hand grip strength right	EFO_0006941	Neale B	UKBB	European	2017	-0.008651	0.001756	8.417e-07	-	335842	0	335842	1	IVNT	Neale-B_UKBB_EUR_2017
rs7148590	rs7148590	chr14:65473196	chr14:65006478	A	G	rs4586342	chr14:65473875	chr14:65007157	C	G	1	0.99602	1	Height	EFO_0004339	Neale B	UKBB	European	2017	-0.01436	0.001727	9.48e-17	-	336474	0	336474	1	IVNT	Neale-B_UKBB_EUR_2017
rs7148590	rs7148590	chr14:65473196	chr14:65006478	A	G	rs4586342	chr14:65473875	chr14:65007157	C	G	1	0.99602	1	Sitting height	EFO_0004339	Neale B	UKBB	European	2017	-0.01211	0.001879	1.151e-10	-	336172	0	336172	1	IVNT	Neale-B_UKBB_EUR_2017
rs7148590	rs7148590	chr14:65473196	chr14:65006478	A	G	rs4586342	chr14:65473875	chr14:65007157	C	G	1	0.99602	1	Trunk fat-free mass	-	Neale B	UKBB	European	2017	-0.007958	0.001532	2.041e-07	-	331030	0	331030	1	IVNT	Neale-B_UKBB_EUR_2017
rs7148590	rs7148590	chr14:65473196	chr14:65006478	A	G	rs4586342	chr14:65473875	chr14:65007157	C	G	1	0.99602	1	Trunk predicted mass	-	Neale B	UKBB	European	2017	-0.007789	0.001527	3.358e-07	-	330995	0	330995	1	IVNT	Neale-B_UKBB_EUR_2017
rs7148590	rs7148590	chr14:65473196	chr14:65006478	A	G	rs4586342	chr14:65473875	chr14:65007157	C	G	1	0.99602	1	Whole body fat-free mass	-	Neale B	UKBB	European	2017	-0.007036	0.001538	4.747e-06	-	331291	0	331291	1	IVNT	Neale-B_UKBB_EUR_2017
rs7148590	rs7148590	chr14:65473196	chr14:65006478	A	G	rs4466998	chr14:65475540	chr14:65008822	A	C	1	0.99208	1	Mean corpuscular hemoglobin	EFO_0004586	Astle W	27863252	European	2016	0.06052	0.003543	2.02e-65	+	173480	0	173480	2	IVNT	Astle-W_Blood-Cell-Traits_EUR_2016
rs7148590	rs7148590	chr14:65473196	chr14:65006478	A	G	rs4466998	chr14:65475540	chr14:65008822	A	C	1	0.99208	1	Mean corpuscular hemoglobin concentration	EFO_0004586	Astle W	27863252	European	2016	0.03433	0.003465	3.949e-23	+	173480	0	173480	2	IVNT	Astle-W_Blood-Cell-Traits_EUR_2016
rs7148590	rs7148590	chr14:65473196	chr14:65006478	A	G	rs4466998	chr14:65475540	chr14:65008822	A	C	1	0.99208	1	Mean corpuscular volume	EFO_0004586	Astle W	27863252	European	2016	0.05022	0.003534	7.612e-46	+	173480	0	173480	2	IVNT	Astle-W_Blood-Cell-Traits_EUR_2016
rs7148590	rs7148590	chr14:65473196	chr14:65006478	A	G	rs4466998	chr14:65475540	chr14:65008822	A	C	1	0.99208	1	Mean platelet volume	EFO_0004586	Astle W	27863252	European	2016	-0.01964	0.003624	5.924e-08	-	173480	0	173480	2	IVNT	Astle-W_Blood-Cell-Traits_EUR_2016
rs7148590	rs7148590	chr14:65473196	chr14:65006478	A	G	rs4466998	chr14:65475540	chr14:65008822	A	C	1	0.99208	1	Platelet count	EFO_0004586	Astle W	27863252	European	2016	0.0211	0.003651	7.46e-09	+	173480	0	173480	2	IVNT	Astle-W_Blood-Cell-Traits_EUR_2016
rs7148590	rs7148590	chr14:65473196	chr14:65006478	A	G	rs4466998	chr14:65475540	chr14:65008822	A	C	1	0.99208	1	Red blood cell count	EFO_0004586	Astle W	27863252	European	2016	-0.02624	0.003561	1.707e-13	-	173480	0	173480	2	IVNT	Astle-W_Blood-Cell-Traits_EUR_2016
rs7148590	rs7148590	chr14:65473196	chr14:65006478	A	G	rs4466998	chr14:65475540	chr14:65008822	A	C	1	0.99208	1	Height	EFO_0004339	GIANT	28146470	European	2017	-0.013	0.0024	1.8e-07	-	381625	0	381625	106	IVNT	GIANT_Height_EUR_2017
rs7148590	rs7148590	chr14:65473196	chr14:65006478	A	G	rs4466998	chr14:65475540	chr14:65008822	A	C	1	0.99208	1	Height	EFO_0004339	GIANT	28146470	Mixed	2017	-0.011	0.0022	4.2e-07	-	458927	0	458927	147	IVNT	GIANT_Height_Mixed_2017
rs7148590	rs7148590	chr14:65473196	chr14:65006478	A	G	rs4466998	chr14:65475540	chr14:65008822	A	C	1	0.99208	1	Mean corpuscular hemoglobin concentration	EFO_0004528	van der Harst P	23222517	Mixed	2012	NA	NA	1.02e-08	NA	71861	-	-	-	-	GRASP
rs7148590	rs7148590	chr14:65473196	chr14:65006478	A	G	rs4466998	chr14:65475540	chr14:65008822	A	C	1	0.99208	1	Mean corpuscular volume	EFO_0004526	Ganesh SK	19862010	European	2009	NA	NA	8.93e-09	NA	24167	-	-	-	-	GRASP
rs7148590	rs7148590	chr14:65473196	chr14:65006478	A	G	rs4466998	chr14:65475540	chr14:65008822	A	C	1	0.99208	1	Mean corpuscular volume	EFO_0004526	van der Harst P	23222517	Mixed	2012	NA	NA	8.37e-07	NA	71861	-	-	-	-	GRASP
rs7148590	rs7148590	chr14:65473196	chr14:65006478	A	G	rs4466998	chr14:65475540	chr14:65008822	A	C	1	0.99208	1	Mean corpuscular volume	EFO_0004526	Ganesh SK	19862010	European	2009	0	NA	5e-08	+	-	-	-	-	fl increase	NHGRI-EBI_GWAS_Catalog
rs7148590	rs7148590	chr14:65473196	chr14:65006478	A	G	rs4466998	chr14:65475540	chr14:65008822	A	C	1	0.99208	1	Comparative height size at age 10	-	Neale B	UKBB	European	2017	-0.01018	0.00166	8.777e-10	-	332021	0	332021	1	-	Neale-B_UKBB_EUR_2017
rs7148590	rs7148590	chr14:65473196	chr14:65006478	A	G	rs4466998	chr14:65475540	chr14:65008822	A	C	1	0.99208	1	Hand grip strength left	EFO_0006941	Neale B	UKBB	European	2017	-0.008704	0.001754	6.935e-07	-	335821	0	335821	1	IVNT	Neale-B_UKBB_EUR_2017
rs7148590	rs7148590	chr14:65473196	chr14:65006478	A	G	rs4466998	chr14:65475540	chr14:65008822	A	C	1	0.99208	1	Hand grip strength right	EFO_0006941	Neale B	UKBB	European	2017	-0.008784	0.001757	5.769e-07	-	335842	0	335842	1	IVNT	Neale-B_UKBB_EUR_2017
rs7148590	rs7148590	chr14:65473196	chr14:65006478	A	G	rs4466998	chr14:65475540	chr14:65008822	A	C	1	0.99208	1	Height	EFO_0004339	Neale B	UKBB	European	2017	-0.01452	0.001728	4.391e-17	-	336474	0	336474	1	IVNT	Neale-B_UKBB_EUR_2017
rs7148590	rs7148590	chr14:65473196	chr14:65006478	A	G	rs4466998	chr14:65475540	chr14:65008822	A	C	1	0.99208	1	Sitting height	EFO_0004339	Neale B	UKBB	European	2017	-0.01237	0.00188	4.68e-11	-	336172	0	336172	1	IVNT	Neale-B_UKBB_EUR_2017
rs7148590	rs7148590	chr14:65473196	chr14:65006478	A	G	rs4466998	chr14:65475540	chr14:65008822	A	C	1	0.99208	1	Trunk fat-free mass	-	Neale B	UKBB	European	2017	-0.00821	0.001532	8.407e-08	-	331030	0	331030	1	IVNT	Neale-B_UKBB_EUR_2017
rs7148590	rs7148590	chr14:65473196	chr14:65006478	A	G	rs4466998	chr14:65475540	chr14:65008822	A	C	1	0.99208	1	Trunk predicted mass	-	Neale B	UKBB	European	2017	-0.008042	0.001527	1.397e-07	-	330995	0	330995	1	IVNT	Neale-B_UKBB_EUR_2017
rs7148590	rs7148590	chr14:65473196	chr14:65006478	A	G	rs4466998	chr14:65475540	chr14:65008822	A	C	1	0.99208	1	Whole body fat-free mass	-	Neale B	UKBB	European	2017	-0.007281	0.001538	2.211e-06	-	331291	0	331291	1	IVNT	Neale-B_UKBB_EUR_2017
rs7148590	rs7148590	chr14:65473196	chr14:65006478	A	G	rs4466998	chr14:65475540	chr14:65008822	A	C	1	0.99208	1	Whole body water mass	-	Neale B	UKBB	European	2017	-0.007003	0.001541	5.474e-06	-	331315	0	331315	1	IVNT	Neale-B_UKBB_EUR_2017
rs7148590	rs7148590	chr14:65473196	chr14:65006478	A	G	rs4466998	chr14:65475540	chr14:65008822	A	C	1	0.99208	1	Erythrocyte indices	EFO_0004306	Ganesh SK	19862010	European	2009	NA	NA	5e-08	NA	-	-	-	-	-	dbGaP
rs7148590	rs7148590	chr14:65473196	chr14:65006478	A	G	rs4899159	chr14:65480595	chr14:65013877	G	A	1	0.9881	0.99601	Mean corpuscular hemoglobin	EFO_0004586	Astle W	27863252	European	2016	0.06046	0.003548	3.972e-65	+	173480	0	173480	2	IVNT	Astle-W_Blood-Cell-Traits_EUR_2016
rs7148590	rs7148590	chr14:65473196	chr14:65006478	A	G	rs4899159	chr14:65480595	chr14:65013877	G	A	1	0.9881	0.99601	Mean corpuscular hemoglobin concentration	EFO_0004586	Astle W	27863252	European	2016	0.03454	0.00347	2.455e-23	+	173480	0	173480	2	IVNT	Astle-W_Blood-Cell-Traits_EUR_2016
rs7148590	rs7148590	chr14:65473196	chr14:65006478	A	G	rs4899159	chr14:65480595	chr14:65013877	G	A	1	0.9881	0.99601	Mean corpuscular volume	EFO_0004586	Astle W	27863252	European	2016	0.05012	0.003538	1.512e-45	+	173480	0	173480	2	IVNT	Astle-W_Blood-Cell-Traits_EUR_2016
rs7148590	rs7148590	chr14:65473196	chr14:65006478	A	G	rs4899159	chr14:65480595	chr14:65013877	G	A	1	0.9881	0.99601	Mean platelet volume	EFO_0004586	Astle W	27863252	European	2016	-0.01988	0.003628	4.28e-08	-	173480	0	173480	2	IVNT	Astle-W_Blood-Cell-Traits_EUR_2016
rs7148590	rs7148590	chr14:65473196	chr14:65006478	A	G	rs4899159	chr14:65480595	chr14:65013877	G	A	1	0.9881	0.99601	Platelet count	EFO_0004586	Astle W	27863252	European	2016	0.0216	0.003655	3.442e-09	+	173480	0	173480	2	IVNT	Astle-W_Blood-Cell-Traits_EUR_2016
rs7148590	rs7148590	chr14:65473196	chr14:65006478	A	G	rs4899159	chr14:65480595	chr14:65013877	G	A	1	0.9881	0.99601	Red blood cell count	EFO_0004586	Astle W	27863252	European	2016	-0.02629	0.003565	1.673e-13	-	173480	0	173480	2	IVNT	Astle-W_Blood-Cell-Traits_EUR_2016
rs7148590	rs7148590	chr14:65473196	chr14:65006478	A	G	rs4899159	chr14:65480595	chr14:65013877	G	A	1	0.9881	0.99601	Mean corpuscular hemoglobin concentration	EFO_0004528	van der Harst P	23222517	Mixed	2012	NA	NA	2.82e-09	NA	71861	-	-	-	-	GRASP
rs7148590	rs7148590	chr14:65473196	chr14:65006478	A	G	rs4899159	chr14:65480595	chr14:65013877	G	A	1	0.9881	0.99601	Mean corpuscular volume	EFO_0004526	Ganesh SK	19862010	European	2009	NA	NA	1.33e-08	NA	24167	-	-	-	-	GRASP
rs7148590	rs7148590	chr14:65473196	chr14:65006478	A	G	rs4899159	chr14:65480595	chr14:65013877	G	A	1	0.9881	0.99601	Mean corpuscular volume	EFO_0004526	van der Harst P	23222517	Mixed	2012	NA	NA	8.17e-07	NA	71861	-	-	-	-	GRASP
rs7148590	rs7148590	chr14:65473196	chr14:65006478	A	G	rs4899159	chr14:65480595	chr14:65013877	G	A	1	0.9881	0.99601	Comparative height size at age 10	-	Neale B	UKBB	European	2017	-0.01017	0.00166	8.929e-10	-	332021	0	332021	1	-	Neale-B_UKBB_EUR_2017
rs7148590	rs7148590	chr14:65473196	chr14:65006478	A	G	rs4899159	chr14:65480595	chr14:65013877	G	A	1	0.9881	0.99601	Hand grip strength left	EFO_0006941	Neale B	UKBB	European	2017	-0.008819	0.001754	4.954e-07	-	335821	0	335821	1	IVNT	Neale-B_UKBB_EUR_2017
rs7148590	rs7148590	chr14:65473196	chr14:65006478	A	G	rs4899159	chr14:65480595	chr14:65013877	G	A	1	0.9881	0.99601	Hand grip strength right	EFO_0006941	Neale B	UKBB	European	2017	-0.00897	0.001757	3.321e-07	-	335842	0	335842	1	IVNT	Neale-B_UKBB_EUR_2017
rs7148590	rs7148590	chr14:65473196	chr14:65006478	A	G	rs4899159	chr14:65480595	chr14:65013877	G	A	1	0.9881	0.99601	Height	EFO_0004339	Neale B	UKBB	European	2017	-0.01468	0.001728	1.988e-17	-	336474	0	336474	1	IVNT	Neale-B_UKBB_EUR_2017
rs7148590	rs7148590	chr14:65473196	chr14:65006478	A	G	rs4899159	chr14:65480595	chr14:65013877	G	A	1	0.9881	0.99601	Sitting height	EFO_0004339	Neale B	UKBB	European	2017	-0.01248	0.00188	3.142e-11	-	336172	0	336172	1	IVNT	Neale-B_UKBB_EUR_2017
rs7148590	rs7148590	chr14:65473196	chr14:65006478	A	G	rs4899159	chr14:65480595	chr14:65013877	G	A	1	0.9881	0.99601	Trunk fat-free mass	-	Neale B	UKBB	European	2017	-0.008323	0.001532	5.594e-08	-	331030	0	331030	1	IVNT	Neale-B_UKBB_EUR_2017
rs7148590	rs7148590	chr14:65473196	chr14:65006478	A	G	rs4899159	chr14:65480595	chr14:65013877	G	A	1	0.9881	0.99601	Trunk predicted mass	-	Neale B	UKBB	European	2017	-0.008149	0.001527	9.53e-08	-	330995	0	330995	1	IVNT	Neale-B_UKBB_EUR_2017
rs7148590	rs7148590	chr14:65473196	chr14:65006478	A	G	rs4899159	chr14:65480595	chr14:65013877	G	A	1	0.9881	0.99601	Whole body fat-free mass	-	Neale B	UKBB	European	2017	-0.007385	0.001538	1.582e-06	-	331291	0	331291	1	IVNT	Neale-B_UKBB_EUR_2017
rs7148590	rs7148590	chr14:65473196	chr14:65006478	A	G	rs4899159	chr14:65480595	chr14:65013877	G	A	1	0.9881	0.99601	Whole body water mass	-	Neale B	UKBB	European	2017	-0.007129	0.001541	3.7e-06	-	331315	0	331315	1	IVNT	Neale-B_UKBB_EUR_2017
rs7148590	rs7148590	chr14:65473196	chr14:65006478	A	G	rs8012008	chr14:65483887	chr14:65017169	C	T	1	0.9881	0.99601	Mean corpuscular hemoglobin	EFO_0004586	Astle W	27863252	European	2016	0.06081	0.00355	9.091e-66	+	173480	0	173480	2	IVNT	Astle-W_Blood-Cell-Traits_EUR_2016
rs7148590	rs7148590	chr14:65473196	chr14:65006478	A	G	rs8012008	chr14:65483887	chr14:65017169	C	T	1	0.9881	0.99601	Mean corpuscular hemoglobin concentration	EFO_0004586	Astle W	27863252	European	2016	0.03486	0.003472	1.028e-23	+	173480	0	173480	2	IVNT	Astle-W_Blood-Cell-Traits_EUR_2016
rs7148590	rs7148590	chr14:65473196	chr14:65006478	A	G	rs8012008	chr14:65483887	chr14:65017169	C	T	1	0.9881	0.99601	Mean corpuscular volume	EFO_0004586	Astle W	27863252	European	2016	0.05027	0.003541	9.667e-46	+	173480	0	173480	2	IVNT	Astle-W_Blood-Cell-Traits_EUR_2016
rs7148590	rs7148590	chr14:65473196	chr14:65006478	A	G	rs8012008	chr14:65483887	chr14:65017169	C	T	1	0.9881	0.99601	Mean platelet volume	EFO_0004586	Astle W	27863252	European	2016	-0.01966	0.003631	6.106e-08	-	173480	0	173480	2	IVNT	Astle-W_Blood-Cell-Traits_EUR_2016
rs7148590	rs7148590	chr14:65473196	chr14:65006478	A	G	rs8012008	chr14:65483887	chr14:65017169	C	T	1	0.9881	0.99601	Platelet count	EFO_0004586	Astle W	27863252	European	2016	0.02128	0.003658	5.938e-09	+	173480	0	173480	2	IVNT	Astle-W_Blood-Cell-Traits_EUR_2016
rs7148590	rs7148590	chr14:65473196	chr14:65006478	A	G	rs8012008	chr14:65483887	chr14:65017169	C	T	1	0.9881	0.99601	Red blood cell count	EFO_0004586	Astle W	27863252	European	2016	-0.02651	0.003568	1.088e-13	-	173480	0	173480	2	IVNT	Astle-W_Blood-Cell-Traits_EUR_2016
rs7148590	rs7148590	chr14:65473196	chr14:65006478	A	G	rs8012008	chr14:65483887	chr14:65017169	C	T	1	0.9881	0.99601	Comparative height size at age 10	-	Neale B	UKBB	European	2017	-0.01017	0.001661	9.083e-10	-	332021	0	332021	1	-	Neale-B_UKBB_EUR_2017
rs7148590	rs7148590	chr14:65473196	chr14:65006478	A	G	rs8012008	chr14:65483887	chr14:65017169	C	T	1	0.9881	0.99601	Hand grip strength left	EFO_0006941	Neale B	UKBB	European	2017	-0.008803	0.001754	5.194e-07	-	335821	0	335821	1	IVNT	Neale-B_UKBB_EUR_2017
rs7148590	rs7148590	chr14:65473196	chr14:65006478	A	G	rs8012008	chr14:65483887	chr14:65017169	C	T	1	0.9881	0.99601	Hand grip strength right	EFO_0006941	Neale B	UKBB	European	2017	-0.009005	0.001757	2.988e-07	-	335842	0	335842	1	IVNT	Neale-B_UKBB_EUR_2017
rs7148590	rs7148590	chr14:65473196	chr14:65006478	A	G	rs8012008	chr14:65483887	chr14:65017169	C	T	1	0.9881	0.99601	Height	EFO_0004339	Neale B	UKBB	European	2017	-0.01474	0.001728	1.53e-17	-	336474	0	336474	1	IVNT	Neale-B_UKBB_EUR_2017
rs7148590	rs7148590	chr14:65473196	chr14:65006478	A	G	rs8012008	chr14:65483887	chr14:65017169	C	T	1	0.9881	0.99601	Sitting height	EFO_0004339	Neale B	UKBB	European	2017	-0.01254	0.00188	2.555e-11	-	336172	0	336172	1	IVNT	Neale-B_UKBB_EUR_2017
rs7148590	rs7148590	chr14:65473196	chr14:65006478	A	G	rs8012008	chr14:65483887	chr14:65017169	C	T	1	0.9881	0.99601	Trunk fat-free mass	-	Neale B	UKBB	European	2017	-0.008345	0.001532	5.168e-08	-	331030	0	331030	1	IVNT	Neale-B_UKBB_EUR_2017
rs7148590	rs7148590	chr14:65473196	chr14:65006478	A	G	rs8012008	chr14:65483887	chr14:65017169	C	T	1	0.9881	0.99601	Trunk predicted mass	-	Neale B	UKBB	European	2017	-0.00817	0.001527	8.845e-08	-	330995	0	330995	1	IVNT	Neale-B_UKBB_EUR_2017
rs7148590	rs7148590	chr14:65473196	chr14:65006478	A	G	rs8012008	chr14:65483887	chr14:65017169	C	T	1	0.9881	0.99601	Whole body fat-free mass	-	Neale B	UKBB	European	2017	-0.00741	0.001538	1.463e-06	-	331291	0	331291	1	IVNT	Neale-B_UKBB_EUR_2017
rs7148590	rs7148590	chr14:65473196	chr14:65006478	A	G	rs8012008	chr14:65483887	chr14:65017169	C	T	1	0.9881	0.99601	Whole body water mass	-	Neale B	UKBB	European	2017	-0.007155	0.001541	3.416e-06	-	331315	0	331315	1	IVNT	Neale-B_UKBB_EUR_2017
rs10484101	rs10484101	chr14:86817626	chr14:86351282	C	T	rs10484100	chr14:86817096	chr14:86350752	G	A	1	1	1	Zinc levels	-	Evans DM	23720494	European	2013	NA	NA	3.3e-06	NA	2603	-	-	-	-	GRASP
rs10484101	rs10484101	chr14:86817626	chr14:86351282	C	T	rs10484100	chr14:86817096	chr14:86350752	G	A	1	1	1	Blood trace element Zn levels	EFO_0005268	Evans DM	23720494	European	2013	NA	NA	3e-06	NA	-	-	-	-	-	NHGRI-EBI_GWAS_Catalog
rs2120019	rs2120019	chr15:75334184	chr15:75041843	C	T	rs2120019	chr15:75334184	chr15:75041843	C	T	0	1	1	Mean corpuscular hemoglobin concentration	EFO_0004586	Astle W	27863252	European	2016	0.0228	0.004386	2.011e-07	+	173480	0	173480	2	IVNT	Astle-W_Blood-Cell-Traits_EUR_2016
rs2120019	rs2120019	chr15:75334184	chr15:75041843	C	T	rs2120019	chr15:75334184	chr15:75041843	C	T	0	1	1	Mean corpuscular volume	EFO_0004586	Astle W	27863252	European	2016	-0.02818	0.004473	2.988e-10	-	173480	0	173480	2	IVNT	Astle-W_Blood-Cell-Traits_EUR_2016
rs2120019	rs2120019	chr15:75334184	chr15:75041843	C	T	rs2120019	chr15:75334184	chr15:75041843	C	T	0	1	1	White blood cell count	EFO_0004586	Astle W	27863252	European	2016	-0.02009	0.004541	9.709e-06	-	173480	0	173480	2	IVNT	Astle-W_Blood-Cell-Traits_EUR_2016
rs2120019	rs2120019	chr15:75334184	chr15:75041843	C	T	rs2120019	chr15:75334184	chr15:75041843	C	T	0	1	1	Mean corpuscular volume	EFO_0004526	van der Harst P	23222517	Mixed	2012	NA	NA	2.1e-07	NA	71861	-	-	-	-	GRASP
rs2120019	rs2120019	chr15:75334184	chr15:75041843	C	T	rs2120019	chr15:75334184	chr15:75041843	C	T	0	1	1	Zinc levels	-	Evans DM	23720494	European	2013	NA	NA	1.55e-18	NA	2603	-	-	-	-	GRASP
rs2120019	rs2120019	chr15:75334184	chr15:75041843	C	T	rs2120019	chr15:75334184	chr15:75041843	C	T	0	1	1	Blood trace element Zn levels	EFO_0005268	Evans DM	23720494	European	2013	0.287	0.03277	2e-18	+	-	-	-	-	unit decrease	NHGRI-EBI_GWAS_Catalog
rs2120019	rs2120019	chr15:75334184	chr15:75041843	C	T	rs2120019	chr15:75334184	chr15:75041843	C	T	0	1	1	Treatment with amitriptyline	EFO_0007056	Neale B	UKBB	European	2017	-0.001957	0.0004244	3.979e-06	-	337159	6403	330756	1	risk diff	Neale-B_UKBB_EUR_2017
rs2120019	rs2120019	chr15:75334184	chr15:75041843	C	T	rs34835684	chr15:75331805	chr15:75039464	G	T	1	1	1	Mean corpuscular hemoglobin concentration	EFO_0004586	Astle W	27863252	European	2016	0.0227	0.004385	2.253e-07	+	173480	0	173480	2	IVNT	Astle-W_Blood-Cell-Traits_EUR_2016
rs2120019	rs2120019	chr15:75334184	chr15:75041843	C	T	rs34835684	chr15:75331805	chr15:75039464	G	T	1	1	1	Mean corpuscular volume	EFO_0004586	Astle W	27863252	European	2016	-0.02803	0.004473	3.664e-10	-	173480	0	173480	2	IVNT	Astle-W_Blood-Cell-Traits_EUR_2016
rs2120019	rs2120019	chr15:75334184	chr15:75041843	C	T	rs34835684	chr15:75331805	chr15:75039464	G	T	1	1	1	White blood cell count	EFO_0004586	Astle W	27863252	European	2016	-0.02016	0.00454	9.017e-06	-	173480	0	173480	2	IVNT	Astle-W_Blood-Cell-Traits_EUR_2016
rs2120019	rs2120019	chr15:75334184	chr15:75041843	C	T	rs34835684	chr15:75331805	chr15:75039464	G	T	1	1	1	Treatment with amitriptyline	EFO_0007056	Neale B	UKBB	European	2017	-0.001967	0.0004243	3.54e-06	-	337159	6403	330756	1	risk diff	Neale-B_UKBB_EUR_2017
rs2120019	rs2120019	chr15:75334184	chr15:75041843	C	T	rs35736167	chr15:75332002	chr15:75039661	G	T	1	1	1	Mean corpuscular hemoglobin concentration	EFO_0004586	Astle W	27863252	European	2016	0.02269	0.004386	2.31e-07	+	173480	0	173480	2	IVNT	Astle-W_Blood-Cell-Traits_EUR_2016
rs2120019	rs2120019	chr15:75334184	chr15:75041843	C	T	rs35736167	chr15:75332002	chr15:75039661	G	T	1	1	1	Mean corpuscular volume	EFO_0004586	Astle W	27863252	European	2016	-0.02812	0.004474	3.279e-10	-	173480	0	173480	2	IVNT	Astle-W_Blood-Cell-Traits_EUR_2016
rs2120019	rs2120019	chr15:75334184	chr15:75041843	C	T	rs35736167	chr15:75332002	chr15:75039661	G	T	1	1	1	White blood cell count	EFO_0004586	Astle W	27863252	European	2016	-0.02014	0.004541	9.189e-06	-	173480	0	173480	2	IVNT	Astle-W_Blood-Cell-Traits_EUR_2016
rs2120019	rs2120019	chr15:75334184	chr15:75041843	C	T	rs35736167	chr15:75332002	chr15:75039661	G	T	1	1	1	Treatment with amitriptyline	EFO_0007056	Neale B	UKBB	European	2017	-0.001966	0.0004244	3.615e-06	-	337159	6403	330756	1	risk diff	Neale-B_UKBB_EUR_2017
rs2120019	rs2120019	chr15:75334184	chr15:75041843	C	T	rs2415255	chr15:75332412	chr15:75040071	G	A	1	1	1	Mean corpuscular hemoglobin concentration	EFO_0004586	Astle W	27863252	European	2016	0.02272	0.004387	2.218e-07	+	173480	0	173480	2	IVNT	Astle-W_Blood-Cell-Traits_EUR_2016
rs2120019	rs2120019	chr15:75334184	chr15:75041843	C	T	rs2415255	chr15:75332412	chr15:75040071	G	A	1	1	1	Mean corpuscular volume	EFO_0004586	Astle W	27863252	European	2016	-0.02816	0.004474	3.11e-10	-	173480	0	173480	2	IVNT	Astle-W_Blood-Cell-Traits_EUR_2016
rs2120019	rs2120019	chr15:75334184	chr15:75041843	C	T	rs2415255	chr15:75332412	chr15:75040071	G	A	1	1	1	White blood cell count	EFO_0004586	Astle W	27863252	European	2016	-0.02018	0.004541	8.832e-06	-	173480	0	173480	2	IVNT	Astle-W_Blood-Cell-Traits_EUR_2016
rs2120019	rs2120019	chr15:75334184	chr15:75041843	C	T	rs2415255	chr15:75332412	chr15:75040071	G	A	1	1	1	Treatment with amitriptyline	EFO_0007056	Neale B	UKBB	European	2017	-0.001966	0.0004244	3.595e-06	-	337159	6403	330756	1	risk diff	Neale-B_UKBB_EUR_2017
rs2120019	rs2120019	chr15:75334184	chr15:75041843	C	T	rs2415254	chr15:75332485	chr15:75040144	G	A	1	1	1	Mean corpuscular hemoglobin concentration	EFO_0004586	Astle W	27863252	European	2016	0.02276	0.004389	2.156e-07	+	173480	0	173480	2	IVNT	Astle-W_Blood-Cell-Traits_EUR_2016
rs2120019	rs2120019	chr15:75334184	chr15:75041843	C	T	rs2415254	chr15:75332485	chr15:75040144	G	A	1	1	1	Mean corpuscular volume	EFO_0004586	Astle W	27863252	European	2016	-0.02832	0.004476	2.49e-10	-	173480	0	173480	2	IVNT	Astle-W_Blood-Cell-Traits_EUR_2016
rs2120019	rs2120019	chr15:75334184	chr15:75041843	C	T	rs2415254	chr15:75332485	chr15:75040144	G	A	1	1	1	White blood cell count	EFO_0004586	Astle W	27863252	European	2016	-0.02016	0.004544	9.162e-06	-	173480	0	173480	2	IVNT	Astle-W_Blood-Cell-Traits_EUR_2016
rs2120019	rs2120019	chr15:75334184	chr15:75041843	C	T	rs2415254	chr15:75332485	chr15:75040144	G	A	1	1	1	Treatment with amitriptyline	EFO_0007056	Neale B	UKBB	European	2017	-0.001966	0.0004244	3.595e-06	-	337159	6403	330756	1	risk diff	Neale-B_UKBB_EUR_2017
rs11638477	rs11638477	chr15:75473227	chr15:75180886	G	T	rs11638477	chr15:75473227	chr15:75180886	G	T	0	1	1	Creatinine in urine	EFO_0007934	Neale B	UKBB	European	2017	0.01109	0.002308	1.55e-06	+	327525	0	327525	1	IVNT	Neale-B_UKBB_EUR_2017
rs8099461	rs8099461	chr18:45938415	chr18:48412044	A	G	rs8099461	chr18:45938415	chr18:48412044	A	G	0	1	1	Basal metabolic rate	EFO_0007777	Neale B	UKBB	European	2017	0.01562	0.003528	9.501e-06	+	331307	0	331307	1	IVNT	Neale-B_UKBB_EUR_2017
rs8099461	rs8099461	chr18:45938415	chr18:48412044	A	G	rs8099461	chr18:45938415	chr18:48412044	A	G	0	1	1	Leg fat-free mass left	-	Neale B	UKBB	European	2017	0.01588	0.003504	5.82e-06	+	331258	0	331258	1	IVNT	Neale-B_UKBB_EUR_2017
rs8099461	rs8099461	chr18:45938415	chr18:48412044	A	G	rs8099461	chr18:45938415	chr18:48412044	A	G	0	1	1	Leg fat-free mass right	-	Neale B	UKBB	European	2017	0.01575	0.003503	6.919e-06	+	331285	0	331285	1	IVNT	Neale-B_UKBB_EUR_2017
rs8099461	rs8099461	chr18:45938415	chr18:48412044	A	G	rs8099461	chr18:45938415	chr18:48412044	A	G	0	1	1	Leg predicted mass left	-	Neale B	UKBB	European	2017	0.0157	0.00348	6.433e-06	+	331253	0	331253	1	IVNT	Neale-B_UKBB_EUR_2017
rs8099461	rs8099461	chr18:45938415	chr18:48412044	A	G	rs8099461	chr18:45938415	chr18:48412044	A	G	0	1	1	Leg predicted mass right	-	Neale B	UKBB	European	2017	0.01548	0.00348	8.663e-06	+	331285	0	331285	1	IVNT	Neale-B_UKBB_EUR_2017
rs8099461	rs8099461	chr18:45938415	chr18:48412044	A	G	rs8099461	chr18:45938415	chr18:48412044	A	G	0	1	1	Weight	EFO_0004338	Neale B	UKBB	European	2017	0.02101	0.004651	6.259e-06	+	336227	0	336227	1	IVNT	Neale-B_UKBB_EUR_2017
rs8099461	rs8099461	chr18:45938415	chr18:48412044	A	G	rs8097976	chr18:45934881	chr18:48408510	C	T	1	1	1	Basal metabolic rate	EFO_0007777	Neale B	UKBB	European	2017	0.01604	0.003555	6.375e-06	+	331307	0	331307	1	IVNT	Neale-B_UKBB_EUR_2017
rs8099461	rs8099461	chr18:45938415	chr18:48412044	A	G	rs8097976	chr18:45934881	chr18:48408510	C	T	1	1	1	Leg fat-free mass left	-	Neale B	UKBB	European	2017	0.01609	0.00353	5.135e-06	+	331258	0	331258	1	IVNT	Neale-B_UKBB_EUR_2017
rs8099461	rs8099461	chr18:45938415	chr18:48412044	A	G	rs8097976	chr18:45934881	chr18:48408510	C	T	1	1	1	Leg fat-free mass right	-	Neale B	UKBB	European	2017	0.01591	0.003529	6.54e-06	+	331285	0	331285	1	IVNT	Neale-B_UKBB_EUR_2017
rs8099461	rs8099461	chr18:45938415	chr18:48412044	A	G	rs8097976	chr18:45934881	chr18:48408510	C	T	1	1	1	Leg predicted mass left	-	Neale B	UKBB	European	2017	0.01591	0.003506	5.675e-06	+	331253	0	331253	1	IVNT	Neale-B_UKBB_EUR_2017
rs8099461	rs8099461	chr18:45938415	chr18:48412044	A	G	rs8097976	chr18:45934881	chr18:48408510	C	T	1	1	1	Leg predicted mass right	-	Neale B	UKBB	European	2017	0.01562	0.003506	8.342e-06	+	331285	0	331285	1	IVNT	Neale-B_UKBB_EUR_2017
rs8099461	rs8099461	chr18:45938415	chr18:48412044	A	G	rs8097976	chr18:45934881	chr18:48408510	C	T	1	1	1	Weight	EFO_0004338	Neale B	UKBB	European	2017	0.02159	0.004686	4.064e-06	+	336227	0	336227	1	IVNT	Neale-B_UKBB_EUR_2017
OpenGWAS
n	position	chr	se	p	beta	id	rsid	ea	nea	eaf	trait
350472	65473196	14	0.00236533	4.82e-123	0.0558216	ukb-d-30050_irnt	rs7148590	A	G	0.513316	Mean corpuscular haemoglobin
350473	65473196	14	0.00237153	7.04e-83	0.0457495	ukb-d-30040_irnt	rs7148590	A	G	0.513322	Mean corpuscular volume
172332	65473196	14	0.00355371	2.85e-64	0.060153	ebi-a-GCST004630	rs7148590	A	G	0.512	Mean corpuscular hemoglobin
172433	65473196	14	0.00354389	1.5e-44	0.0496234	ebi-a-GCST004602	rs7148590	A	G	0.512	Mean corpuscular volume
350468	65473196	14	0.00237093	2.27e-31	0.0276258	ukb-d-30060_irnt	rs7148590	A	G	0.513318	Mean corpuscular haemoglobin concentration
350475	65473196	14	0.00204173	1.46e-23	-0.0204269	ukb-d-30010_irnt	rs7148590	A	G	0.513319	Red blood cell (erythrocyte) count
172851	65473196	14	0.00347521	1.58e-23	0.0347394	ebi-a-GCST004605	rs7148590	A	G	0.5119	Mean corpuscular hemoglobin concentration
344729	65473196	14	0.00240889	4.4e-23	0.0238365	ukb-d-30290_irnt	rs7148590	A	G	0.513181	High light scatter reticulocyte percentage
461950	65473196	14	0.00131512	1.3e-22	-0.0128698	ukb-b-10787	rs7148590	A	G	0.511105	Standing height
344728	65473196	14	0.0024089	8.54e-22	0.0231105	ukb-d-30240_irnt	rs7148590	A	G	0.513179	Reticulocyte percentage
461950	109433358	4	0.00142844	1.7e-21	0.0136023	ukb-b-10787	rs17511001	A	G	0.296687	Standing height
7357	78316476	5	0.0025	1.27e-18	-0.0216	met-a-362	rs921943	T	C	0.2877	Betaine
2874	78316476	5	0.03	1.43e-18	0.264	ieu-a-1075	rs921943	T	C	NA	Selenium
2603	75334184	15	0.033	1.55e-18	-0.287	ieu-a-1079	rs2120019	C	T	NA	Zinc
350470	65473196	14	0.00239116	2.69e-18	-0.0208611	ukb-d-30100_irnt	rs7148590	A	G	0.513322	Mean platelet (thrombocyte) volume
350474	65473196	14	0.00231457	1.53e-17	0.0197322	ukb-d-30080_irnt	rs7148590	A	G	0.513321	Platelet count
344729	65473196	14	0.00239139	4.73e-17	0.0200725	ukb-d-30300_irnt	rs7148590	A	G	0.513181	High light scatter reticulocyte count
336474	65473196	14	0.00172903	5.53e-17	-0.0144809	ukb-a-389	rs7148590	A	G	0.513949	Standing height
2603	75473227	15	0.028	1.01e-15	0.223	ieu-a-1079	rs11638477	T	G	NA	Zinc
336474	109433358	4	0.00189025	2.12e-15	0.014998	ukb-a-389	rs17511001	A	G	0.296608	Standing height
461536	65473196	14	0.00150701	4.6e-15	-0.0118121	ukb-b-16881	rs7148590	A	G	0.511079	Sitting height
252900	109433358	4	0.0032	9.9e-15	0.025	ieu-a-89	rs17511001	A	G	0.3	Height
519282	75334184	15	0.002425	1.1e-14	-0.018753	ieu-b-34	rs2120019	C	T	0.195183	neutrophil cell count
350473	75334184	15	0.003023	1.44e-14	-0.0232565	ukb-d-30040_irnt	rs2120019	C	T	0.188834	Mean corpuscular volume
344729	65473196	14	0.00237825	4.72e-14	0.0179317	ukb-d-30250_irnt	rs7148590	A	G	0.513181	Reticulocyte count
428860	75473227	15	0.00161833	5.8e-14	0.0121578	ukb-b-5237	rs11638477	T	G	0.483358	Coffee intake
450243	65473196	14	0.0019	6.08e-14	-0.0143	ebi-a-GCST90000025	rs7148590	A	G	0.5114	Appendicular lean mass
344728	75334184	15	0.00305506	7.89e-14	-0.0228286	ukb-d-30260_irnt	rs2120019	C	T	0.188723	Mean reticulocyte volume
172952	65473196	14	0.00357127	1.07e-13	-0.0265405	ebi-a-GCST004601	rs7148590	A	G	0.5119	Red blood cell count
344728	75473227	15	0.00240142	2.35e-13	0.0175968	ukb-d-30260_irnt	rs11638477	T	G	0.485143	Mean reticulocyte volume
265753	45938415	18	0.00496085	5.7e-13	-0.0357508	ukb-b-4080	rs8099461	G	A	0.055169	Ankle spacing width
562237	75334184	15	0.002317	6.12e-13	-0.016689	ieu-b-30	rs2120019	C	T	0.196605	white blood cell count
344729	65473196	14	0.00239956	7.07e-13	0.0172247	ukb-d-30270_irnt	rs7148590	A	G	0.513181	Mean sphered cell volume
344292	24052526	6	0.0023466	2.31e-11	0.015687	ukb-d-30610_irnt	rs9348626	T	C	0.56695	Alkaline phosphatase
51493	65473196	14	0.0098	2.79e-11	0.0668	ieu-a-271	rs7148590	A	G	NA	Mean cell haemoglobin
447485	75473227	15	0.00212423	3.7e-11	0.0140562	ukb-b-6066	rs11638477	T	G	0.483042	Tea intake
350474	75334184	15	0.00294921	4.6e-11	-0.019416	ukb-d-30080_irnt	rs2120019	C	T	0.188833	Platelet count
336172	65473196	14	0.00188094	5.58e-11	-0.012329	ukb-a-195	rs7148590	A	G	0.513949	Sitting height
2603	78316476	5	0.034	9.33e-11	0.222	ieu-a-1077	rs921943	T	C	NA	Selenium
344728	65473196	14	0.00239735	1.27e-10	0.0154178	ukb-d-30260_irnt	rs7148590	A	G	0.513181	Mean reticulocyte volume
172433	75334184	15	0.00447345	2.99e-10	-0.02818	ebi-a-GCST004602	rs2120019	C	T	0.192	Mean corpuscular volume
349856	75334184	15	0.00303346	3.35e-10	-0.0190551	ukb-d-30140_irnt	rs2120019	C	T	0.188847	Neutrophill count
344292	24052526	6	0.062851	4.52e-10	0.39187	ukb-d-30610_raw	rs9348626	T	C	0.56695	Alkaline phosphatase
244730	65473196	14	0.00256301	6.9e-10	-0.0161922	ebi-a-GCST90000027	rs7148590	A	G	0.510351	Appendicular lean mass
344729	75473227	15	0.00238241	9.19e-10	-0.0145877	ukb-d-30250_irnt	rs11638477	T	G	0.485143	Reticulocyte count
332021	65473196	14	0.00166113	1.15e-09	-0.0101124	ukb-a-35	rs7148590	A	G	0.513949	Comparative height size at age 10
474235	65473196	14	0.001988	1.72e-09	0.011985	ieu-b-33	rs7148590	A	G	0.510594	eosinophil cell count
166066	65473196	14	0.00366182	1.96e-09	0.0219737	ebi-a-GCST004603	rs7148590	A	G	0.5125	Platelet count
350470	75334184	15	0.00303778	2.14e-09	-0.018188	ukb-d-30000_irnt	rs2120019	C	T	0.188834	White blood cell (leukocyte) count
336172	78316476	5	0.00208226	2.53e-09	0.0124096	ukb-a-195	rs921943	T	C	0.282513	Sitting height
350470	75334184	15	0.00301572	2.88e-09	0.0179087	ukb-d-30110_irnt	rs2120019	C	T	0.188834	Platelet distribution width
457873	75473227	15	0.00118946	2.9e-09	-0.00706333	ukb-b-14203	rs11638477	T	G	0.482963	Hot drink temperature
450243	45938415	18	0.0041	3.17e-09	-0.0246	ebi-a-GCST90000025	rs8099461	G	A	0.0555	Appendicular lean mass
344728	65473196	14	0.00240647	3.19e-09	0.0142497	ukb-d-30280_irnt	rs7148590	A	G	0.513181	Immature reticulocyte fraction
344729	75334184	15	0.00305802	3.52e-09	-0.0180595	ukb-d-30270_irnt	rs2120019	C	T	0.188723	Mean sphered cell volume
454508	65473196	14	0.00124147	4.9e-09	-0.00726246	ukb-b-17409	rs7148590	A	G	0.51112	Trunk fat-free mass
461536	109433358	4	0.00164245	5.1e-09	0.00959987	ukb-b-16881	rs17511001	A	G	0.296667	Sitting height
344729	75334184	15	0.00303089	6.34e-09	0.0176026	ukb-d-30250_irnt	rs2120019	C	T	0.188723	Reticulocyte count
344104	78316476	5	0.0021521	7.05e-09	0.012461	ukb-d-30700_irnt	rs921943	T	C	0.28144	Creatinine
350474	65473196	14	0.00189543	7.77e-09	0.0109433	ukb-d-30020_irnt	rs7148590	A	G	0.513318	Haemoglobin concentration
454789	46957787	2	0.00266699	8e-09	0.015387	ukb-b-12854	rs17771017	G	A	0.089839	Arm fat percentage (right)
454463	65473196	14	0.0012375	8.1e-09	-0.00713695	ukb-b-9685	rs7148590	A	G	0.51112	Trunk predicted mass
454724	46957787	2	0.00265208	9.6e-09	0.0152147	ukb-b-20188	rs17771017	G	A	0.089838	Arm fat percentage (left)
461460	46957787	2	0.00344313	1e-08	0.0197239	ukb-b-19953	rs17771017	G	A	0.089841	Body mass index (BMI)
344728	75334184	15	0.00307011	1.26e-08	0.0174732	ukb-d-30240_irnt	rs2120019	C	T	0.188723	Reticulocyte percentage
461026	65473196	14	0.00148772	1.3e-08	-0.00845224	ukb-b-7478	rs7148590	A	G	0.51111	Hand grip strength (left)
681943	46957787	2	0.003	1.6e-08	0.0172	ieu-b-40	rs17771017	G	A	0.08624	body mass index
3301	75334184	15	0.0311	1.7e-08	-0.1752	prot-a-328	rs2120019	C	T	0.19184	Carbonic anhydrase 1
164454	65473196	14	0.00363502	1.93e-08	-0.0204239	ebi-a-GCST004599	rs7148590	A	G	0.5127	Mean platelet volume
336474	78316476	5	0.00191412	2.06e-08	0.0107318	ukb-a-389	rs921943	T	C	0.282513	Standing height
454884	46957787	2	0.00346876	2.5e-08	0.0193265	ukb-b-2303	rs17771017	G	A	0.089841	Body mass index (BMI)
520184	75473227	15	0.001918	2.55e-08	-0.010691	ieu-b-31	rs11638477	T	G	0.475396	monocyte cell count
461950	78316476	5	0.00144445	3.3e-08	0.00797775	ukb-b-10787	rs921943	T	C	0.283121	Standing height
461089	65473196	14	0.00148998	3.5e-08	-0.0082156	ukb-b-10215	rs7148590	A	G	0.511072	Hand grip strength (right)
461536	78316476	5	0.00166082	3.8e-08	0.00913368	ukb-b-16881	rs921943	T	C	0.283139	Sitting height
350471	75334184	15	0.0028995	3.82e-08	-0.015944	ukb-d-30090_irnt	rs2120019	C	T	0.188834	Platelet crit
344728	85821010	8	0.00243879	4.07e-08	-0.0133836	ukb-d-30260_irnt	rs13273360	C	T	0.574618	Mean reticulocyte volume
454799	45938415	18	0.00282608	4.1e-08	-0.0155078	ukb-b-17271	rs8099461	G	A	0.055646	Leg predicted mass (left)
447485	75334184	15	0.00267972	4.7e-08	-0.0146414	ukb-b-6066	rs2120019	C	T	0.192593	Tea intake
344728	75473227	15	0.00241326	5.39e-08	-0.0131236	ukb-d-30240_irnt	rs11638477	T	G	0.485143	Reticulocyte percentage
454805	45938415	18	0.00284463	5.4e-08	-0.0154698	ukb-b-16099	rs8099461	G	A	0.055646	Leg fat-free mass (left)
454835	45938415	18	0.00284322	5.7e-08	-0.0154301	ukb-b-12828	rs8099461	G	A	0.055646	Leg fat-free mass (right)
57895	65473196	14	0.0251	6.03e-08	0.1437	ieu-a-273	rs7148590	A	G	NA	Mean cell volume
7349	65473196	14	0.0009	6.07e-08	0.0049	met-a-379	rs7148590	A	G	0.5246	Carnitine
454888	45938415	18	0.00271863	7.4e-08	-0.0146323	ukb-b-14540	rs8099461	G	A	0.055648	Whole body water mass
454834	45938415	18	0.00282489	7.4e-08	-0.0152016	ukb-b-14310	rs8099461	G	A	0.055645	Leg predicted mass (right)
454757	46957787	2	0.00342472	7.7e-08	0.0184073	ukb-b-6704	rs17771017	G	A	0.089841	Arm fat mass (right)
454874	45938415	18	0.00285378	8.2e-08	-0.0153042	ukb-b-16446	rs8099461	G	A	0.055648	Basal metabolic rate
331030	65473196	14	0.00153302	1.07e-07	-0.00814809	ukb-a-292	rs7148590	A	G	0.513949	Trunk fat-free mass
349861	65473196	14	0.0023143	1.09e-07	-0.0122912	ukb-d-30190_irnt	rs7148590	A	G	0.51331	Monocyte percentage
344729	75473227	15	0.00240377	1.14e-07	0.0127482	ukb-d-30270_irnt	rs11638477	T	G	0.485143	Mean sphered cell volume
332021	109433358	4	0.00181625	1.17e-07	0.00962283	ukb-a-35	rs17511001	A	G	0.296608	Comparative height size at age 10
454850	45938415	18	0.00271407	1.2e-07	-0.0143774	ukb-b-13354	rs8099461	G	A	0.055651	Whole body fat-free mass
336172	109433358	4	0.00205643	1.27e-07	0.0108636	ukb-a-195	rs17511001	A	G	0.296608	Sitting height
2603	65473196	14	0.026	1.37e-07	-0.14	ieu-a-1079	rs7148590	A	G	NA	Zinc
344104	78421780	5	0.0023711	1.39e-07	-0.012489	ukb-d-30730_irnt	rs694290	A	G	0.67524	Gamma glutamyltransferase
454633	46957787	2	0.00268672	1.4e-07	0.0141489	ukb-b-8909	rs17771017	G	A	0.089843	Body fat percentage
454850	65473196	14	0.00124644	1.6e-07	-0.0065391	ukb-b-13354	rs7148590	A	G	0.511117	Whole body fat-free mass
344104	78316476	5	0.041638	1.66e-07	0.21795	ukb-d-30700_raw	rs921943	T	C	0.28144	Creatinine
2603	85821010	8	0.027	1.75e-07	-0.143	ieu-a-1079	rs13273360	C	T	NA	Zinc
330995	65473196	14	0.00152803	1.8e-07	-0.00797509	ukb-a-293	rs7148590	A	G	0.513949	Trunk predicted mass
696460	75473227	15	0.018	1.92e-07	-0.0939	ieu-b-39	rs11638477	T	G	0.4719	diastolic blood pressure
172851	75334184	15	0.00438607	2.01e-07	0.0228	ebi-a-GCST004605	rs2120019	C	T	0.192	Mean corpuscular hemoglobin concentration
45828	75334184	15	0.0347	2.1e-07	-0.1758	ieu-a-273	rs2120019	C	T	NA	Mean cell volume
454684	46957787	2	0.00342481	2.6e-07	0.0176338	ukb-b-8338	rs17771017	G	A	0.089839	Arm fat mass (left)
2874	78421780	5	0.028	2.68e-07	-0.143	ieu-a-1075	rs694290	A	G	NA	Selenium
349861	75473227	15	0.00231773	2.84e-07	-0.0118989	ukb-d-30190_irnt	rs11638477	T	G	0.485102	Monocyte percentage
2874	78803778	5	0.047	3.9e-07	0.236	ieu-a-1075	rs11948804	T	C	NA	Selenium
454888	65473196	14	0.00124849	4e-07	-0.00632564	ukb-b-14540	rs7148590	A	G	0.511118	Whole body water mass
146226	45938415	18	0.006724	4.2e-07	-0.0340226	ukb-b-2122	rs8099461	G	A	0.055633	Ankle spacing width (left)
344729	85821010	8	0.00243285	5.04e-07	0.0122251	ukb-d-30300_irnt	rs13273360	C	T	0.57462	High light scatter reticulocyte count
454835	78316476	5	0.00143956	5.1e-07	0.00723047	ukb-b-12828	rs921943	T	C	0.28311	Leg fat-free mass (right)
454846	46957787	2	0.0027926	5.3e-07	0.0140064	ukb-b-18096	rs17771017	G	A	0.08984	Leg fat mass (right)
335821	65473196	14	0.00175463	5.63e-07	-0.00877964	ukb-a-374	rs7148590	A	G	0.513949	Hand grip strength (left)
454137	46957787	2	0.00340443	5.7e-07	0.0170315	ukb-b-19393	rs17771017	G	A	0.089842	Whole body fat mass
335842	65473196	14	0.00175802	5.7e-07	-0.00879198	ukb-a-379	rs7148590	A	G	0.513949	Hand grip strength (right)
7357	78421780	5	0.0024	5.76e-07	0.0121	met-a-362	rs694290	A	G	0.6777	Betaine
332021	78316476	5	0.00183894	5.89e-07	0.0091852	ukb-a-35	rs921943	T	C	0.282513	Comparative height size at age 10
454672	45938415	18	0.0027522	6.2e-07	-0.0137189	ukb-b-19925	rs8099461	G	A	0.055648	Arm fat-free mass (left)
2603	80928809	11	0.065	6.73e-07	0.325	ieu-a-1079	rs11232535	C	T	NA	Zinc
454854	46957787	2	0.00222464	6.8e-07	0.0110524	ukb-b-20531	rs17771017	G	A	0.08984	Leg fat percentage (right)
2603	15630871	7	0.039	6.9e-07	-0.192	ieu-a-1079	rs11763353	G	A	NA	Zinc
454613	46957787	2	0.0032263	7.7e-07	0.0159492	ukb-b-16407	rs17771017	G	A	0.089841	Trunk fat percentage
454834	78316476	5	0.00143026	8.5e-07	0.00704219	ukb-b-14310	rs921943	T	C	0.283109	Leg predicted mass (right)
461950	182867579	2	0.00155155	9e-07	-0.00762057	ukb-b-10787	rs1153734	G	A	0.227277	Standing height
454826	46957787	2	0.00219637	9.5e-07	0.0107653	ukb-b-18377	rs17771017	G	A	0.089838	Leg fat percentage (left)
454508	45938415	18	0.00270375	9.8e-07	-0.0132389	ukb-b-17409	rs8099461	G	A	0.05565	Trunk fat-free mass
454823	46957787	2	0.00275966	9.9e-07	0.0135037	ukb-b-7212	rs17771017	G	A	0.089839	Leg fat mass (left)
450243	109433358	4	0.0021	9.97e-07	0.0101	ebi-a-GCST90000025	rs17511001	A	G	0.2968	Appendicular lean mass
344729	85821010	8	0.00245075	1.1e-06	0.0119411	ukb-d-30290_irnt	rs13273360	C	T	0.57462	High light scatter reticulocyte percentage
454463	45938415	18	0.00269502	1.2e-06	-0.0130736	ukb-b-9685	rs8099461	G	A	0.055653	Trunk predicted mass
454799	78316476	5	0.00143096	1.3e-06	0.00691743	ukb-b-17271	rs921943	T	C	0.283109	Leg predicted mass (left)
350472	75334184	15	0.00301605	1.53e-06	-0.0144999	ukb-d-30050_irnt	rs2120019	C	T	0.188835	Mean corpuscular haemoglobin
327525	75473227	15	0.00230775	1.55e-06	-0.0110882	ukb-a-333	rs11638477	T	G	0.484815	Creatinine (enzymatic) in urine
454805	78316476	5	0.00144042	1.7e-06	0.00688859	ukb-b-16099	rs921943	T	C	0.283108	Leg fat-free mass (left)
350471	65473196	14	0.00227567	1.81e-06	0.010863	ukb-d-30090_irnt	rs7148590	A	G	0.513321	Platelet crit
2874	56874242	4	0.026	2.32e-06	-0.125	ieu-a-1075	rs6823178	A	G	NA	Selenium
454588	46957787	2	0.00351102	2.5e-06	0.0165231	ukb-b-20044	rs17771017	G	A	0.08984	Trunk fat mass
331291	65473196	14	0.00153904	2.75e-06	-0.00721662	ukb-a-266	rs7148590	A	G	0.513949	Whole body fat-free mass
766345	153697021	3	0.00215	2.77e-06	-0.01007	ieu-a-1239	rs1521328	A	G	0.7755	Years of schooling
454893	45938415	18	0.00381662	2.9e-06	-0.0178627	ukb-b-12039	rs8099461	G	A	0.055646	Weight
2603	5930033	4	0.047	3e-06	0.218	ieu-a-1079	rs4333127	A	G	NA	Zinc
344104	75334184	15	0.0024735	3.18e-06	0.011524	ukb-d-30700_irnt	rs2120019	C	T	0.18894	Creatinine
2603	86817626	14	0.045	3.34e-06	-0.209	ieu-a-1079	rs10484101	C	T	NA	Zinc
244730	45938415	18	0.00556249	3.8e-06	-0.0255983	ebi-a-GCST90000027	rs8099461	G	A	0.055884	Appendicular lean mass
337159	75334184	15	0.000424364	3.98e-06	-0.00195741	ukb-a-146	rs2120019	C	T	0.188401	Treatment/medication code: amitriptyline
461632	45938415	18	0.00378943	4.2e-06	-0.0174377	ukb-b-11842	rs8099461	G	A	0.055639	Weight
454746	65473196	14	0.00123562	4.5e-06	-0.00566596	ukb-b-16698	rs7148590	A	G	0.511127	Arm predicted mass (right)
454655	45938415	18	0.00274151	4.5e-06	-0.01257	ukb-b-9093	rs8099461	G	A	0.055649	Arm predicted mass (left)
454746	45938415	18	0.0026906	4.6e-06	-0.0123323	ukb-b-16698	rs8099461	G	A	0.055646	Arm predicted mass (right)
463010	75334184	15	0.000281271	4.8e-06	-0.00128695	ukb-b-17191	rs2120019	C	T	0.192891	Operative procedures - secondary OPCS: Y53.1 Approach to organ under radiological control
766345	45938415	18	0.00382	4.91e-06	0.01743	ieu-a-1239	rs8099461	G	A	0.05102	Years of schooling
454753	45938415	18	0.00269975	5e-06	-0.0123282	ukb-b-19520	rs8099461	G	A	0.055646	Arm fat-free mass (right)
2603	16552963	2	0.118	5.13e-06	0.539	ieu-a-1079	rs7569234	C	T	NA	Zinc
2603	45938415	18	0.061	5.21e-06	-0.278	ieu-a-1079	rs8099461	G	A	NA	Zinc
450243	78316476	5	0.0021	5.22e-06	0.0095	ebi-a-GCST90000025	rs921943	T	C	0.2829	Appendicular lean mass
350470	65473196	14	0.00238424	5.67e-06	0.0108205	ukb-d-30000_irnt	rs7148590	A	G	0.513321	White blood cell (leukocyte) count
336474	182867579	2	0.0020683	5.77e-06	-0.00937937	ukb-a-389	rs1153734	G	A	0.226125	Standing height
331258	45938415	18	0.00350406	5.82e-06	-0.0158836	ukb-a-280	rs8099461	G	A	0.0550624	Leg fat-free mass (left)
454874	65473196	14	0.00131071	5.9e-06	-0.00593803	ukb-b-16446	rs7148590	A	G	0.511119	Basal metabolic rate
454888	78316476	5	0.00137587	6e-06	0.00622777	ukb-b-14540	rs921943	T	C	0.283107	Whole body water mass
454850	78316476	5	0.00137362	6e-06	0.0062184	ukb-b-13354	rs921943	T	C	0.283107	Whole body fat-free mass
336227	45938415	18	0.00465104	6.26e-06	-0.0210112	ukb-a-249	rs8099461	G	A	0.0550624	Weight
331315	65473196	14	0.00154132	6.35e-06	-0.0069584	ukb-a-267	rs7148590	A	G	0.513949	Whole body water mass
64949	75473227	15	0.00669227	6.4e-06	0.0301953	ukb-b-748	rs11638477	T	G	0.479297	Filtered coffee intake
331253	45938415	18	0.00348023	6.43e-06	-0.0157018	ukb-a-281	rs8099461	G	A	0.0550624	Leg predicted mass (left)
38371	153697021	3	0.00788782	6.9e-06	-0.0354667	ukb-b-1998	rs1521328	A	G	0.800623	Number of unenthusiastic/disinterested episodes
331285	45938415	18	0.00350271	6.92e-06	-0.015749	ukb-a-276	rs8099461	G	A	0.0550624	Leg fat-free mass (right)
454874	78316476	5	0.00144476	7.1e-06	0.00648862	ukb-b-16446	rs921943	T	C	0.283103	Basal metabolic rate
2603	109433358	4	0.029	7.11e-06	0.132	ieu-a-1079	rs17511001	A	G	NA	Zinc
350473	75473227	15	0.00237602	7.73e-06	0.0106268	ukb-d-30040_irnt	rs11638477	T	G	0.48508	Mean corpuscular volume
454655	65473196	14	0.00125903	7.9e-06	-0.00562384	ukb-b-9093	rs7148590	A	G	0.511124	Arm predicted mass (left)
454672	65473196	14	0.00126401	8e-06	-0.0056437	ukb-b-19925	rs7148590	A	G	0.511126	Arm fat-free mass (left)
2874	153697021	3	0.033	8.13e-06	0.145	ieu-a-1075	rs1521328	A	G	NA	Selenium
2874	46957787	2	0.047	8.23e-06	-0.21	ieu-a-1075	rs17771017	G	A	NA	Selenium
458079	85821010	8	0.000936506	8.3e-06	0.0041745	ukb-b-11615	rs13273360	C	T	0.572542	Qualifications: A levels/AS levels or equivalent
331285	45938415	18	0.00347989	8.66e-06	-0.0154791	ukb-a-277	rs8099461	G	A	0.0550624	Leg predicted mass (right)
2603	99223307	14	0.055	9.35e-06	-0.242	ieu-a-1079	rs17097781	T	C	NA	Zinc
331307	45938415	18	0.00352843	9.5e-06	-0.0156249	ukb-a-268	rs8099461	G	A	0.0550624	Basal metabolic rate
2874	182867579	2	0.031	9.67e-06	-0.138	ieu-a-1075	rs1153734	G	A	NA	Selenium
172435	75334184	15	0.00454079	9.71e-06	-0.0200864	ebi-a-GCST004610	rs2120019	C	T	0.192	White blood cell count
NA	65473196	14	0.004476	9.8e-06	0.01979	bbj-a-40	rs7148590	A	G	0.6049	Mean corpuscular volume
461950	45938415	18	0.00286762	9.8e-06	-0.0126815	ukb-b-10787	rs8099461	G	A	0.055633	Standing height
458309	75473227	15	0.00271605	9.8e-06	0.0120073	ukb-b-298	rs11638477	T	G	0.482829	Frequency of stair climbing in last 4 weeks
2874	24052526	6	0.026	9.84e-06	-0.116	ieu-a-1075	rs9348626	T	C	NA	Selenium
NA	78421780	5	0.0228786	9.98e-06	0.101068	bbj-a-148	rs694290	A	G	0.684519	Prostate cancer
350473	142352978	3	0.00239502	4.96e-63	-0.0401434	ukb-d-30040_irnt	rs13074172	G	A	0.427958	Mean corpuscular volume
344729	3691528	1	0.00287442	3.27e-62	0.0478554	ukb-d-30300_irnt	rs1175550	G	A	0.230932	High light scatter reticulocyte count
344729	3691528	1	0.00285871	7.5e-55	0.0445983	ukb-d-30250_irnt	rs1175550	G	A	0.230932	Reticulocyte count
344729	3691528	1	0.00289572	2.81e-54	0.0449307	ukb-d-30290_irnt	rs1175550	G	A	0.230932	High light scatter reticulocyte percentage
344182	3691528	1	0.0027694	1.57e-52	-0.042249	ukb-d-30750_irnt	rs1175550	G	A	0.23081	Glycated haemoglobin
170761	3691528	1	0.00424985	1.03e-49	0.0629994	ebi-a-GCST004611	rs1175550	G	A	0.2319	High light scatter reticulocyte count
350472	142352978	3	0.00238959	1.27e-49	-0.035395	ukb-d-30050_irnt	rs13074172	G	A	0.427956	Mean corpuscular haemoglobin
344728	3691528	1	0.00289587	8.89e-46	0.0411335	ukb-d-30240_irnt	rs1175550	G	A	0.230931	Reticulocyte percentage
350468	3691528	1	0.00285064	1.44e-45	0.0403948	ukb-d-30060_irnt	rs1175550	G	A	0.230895	Mean corpuscular haemoglobin concentration
344729	3691528	1	0.00288452	9.56e-44	-0.0400153	ukb-d-30270_irnt	rs1175550	G	A	0.230932	Mean sphered cell volume
172851	3691528	1	0.00410747	1.37e-43	0.0568666	ebi-a-GCST004605	rs1175550	G	A	0.2321	Mean corpuscular hemoglobin concentration
344728	142352978	3	0.00242035	1.91e-43	-0.0334553	ukb-d-30260_irnt	rs13074172	G	A	0.427968	Mean reticulocyte volume
170763	3691528	1	0.00425008	2.5e-43	0.0586573	ebi-a-GCST004612	rs1175550	G	A	0.2319	High light scatter reticulocyte percentage of red cells
350473	3691528	1	0.00285773	8.62e-43	-0.0391902	ukb-d-30070_irnt	rs1175550	G	A	0.230896	Red blood cell (erythrocyte) distribution width
170641	3691528	1	0.00425597	2.44e-42	0.0580353	ebi-a-GCST004622	rs1175550	G	A	0.2319	Reticulocyte count
344729	142352978	3	0.00242273	1.35e-36	-0.0306149	ukb-d-30270_irnt	rs13074172	G	A	0.427967	Mean sphered cell volume
170690	3691528	1	0.00425368	3.29e-34	0.0518756	ebi-a-GCST004619	rs1175550	G	A	0.2319	Reticulocyte fraction of red cells
344728	3691528	1	0.00289303	1.08e-29	0.0327445	ukb-d-30280_irnt	rs1175550	G	A	0.230931	Immature reticulocyte fraction
350474	3691528	1	0.00227887	2.04e-28	0.0251983	ukb-d-30020_irnt	rs1175550	G	A	0.230895	Haemoglobin concentration
170548	3691528	1	0.00421123	2.97e-27	0.0455377	ebi-a-GCST004628	rs1175550	G	A	0.2319	Immature fraction of reticulocytes
121047	142352978	3	0.004738	7.81e-24	-0.047723	ebi-a-GCST90002335	rs13074172	G	A	0.241423	Mean corpuscular volume
350473	142352978	3	0.00240015	8.78e-22	0.0230199	ukb-d-30070_irnt	rs13074172	G	A	0.427958	Red blood cell (erythrocyte) distribution width
344182	3691528	1	0.01848	9.04e-22	-0.17719	ukb-d-30750_raw	rs1175550	G	A	0.23081	Glycated haemoglobin
171529	3691528	1	0.00419719	3.72e-21	-0.0396225	ebi-a-GCST004621	rs1175550	G	A	0.232	Sum basophil neutrophil counts
172433	142352978	3	0.00356389	4.45e-21	-0.0335766	ebi-a-GCST004602	rs13074172	G	A	0.427	Mean corpuscular volume
2603	151344741	1	0.034	2.63e-20	0.313	ieu-a-1073	rs2769264	G	T	NA	Copper
350475	142352978	3	0.00206173	2.85e-20	0.0190191	ukb-d-30010_irnt	rs13074172	G	A	0.427957	Red blood cell (erythrocyte) count
350475	3691528	1	0.00245515	3.49e-19	0.0219802	ukb-d-30010_irnt	rs1175550	G	A	0.230894	Red blood cell (erythrocyte) count
NA	142352978	3	0.004948	4.99e-19	-0.0441	bbj-a-40	rs13074172	G	A	0.2401	Mean corpuscular volume
NA	33017869	22	0.00356113	1.2e-18	0.0311963	bbj-a-70	rs9609603	C	T	0.27199	Height
314916	169674179	2	0.0041644	6.31e-18	0.035927	ukb-d-30740_irnt	rs2461362	T	C	0.098838	Glucose
119629	142352978	3	0.004767	7.87e-18	-0.041034	ebi-a-GCST90002323	rs13074172	G	A	0.241431	Mean corpuscular hemoglobin
172332	142352978	3	0.00357455	5.2e-17	-0.0299618	ebi-a-GCST004630	rs13074172	G	A	0.427	Mean corpuscular hemoglobin
116666	3691528	1	0.00470922	1.9e-16	-0.0366979	ebi-a-GCST006804	rs1175550	G	A	0.231115	Red cell distribution width
50425	3691528	1	0.0043	8.62e-15	0.0167	ieu-a-272	rs1175550	G	A	NA	Mean cell haemoglobin concentration
NA	142352978	3	0.004947	9.69e-15	-0.0383	bbj-a-38	rs13074172	G	A	0.2401	Mean corpuscular hemoglobin
172925	3691528	1	0.00420583	2.93e-14	0.0319697	ebi-a-GCST004615	rs1175550	G	A	0.2321	Hemoglobin concentration
2603	151355858	1	0.046	4.36e-14	-0.349	ieu-a-1073	rs2769270	A	G	NA	Copper
172433	3691528	1	0.0041839	3.32e-13	-0.0304615	ebi-a-GCST004602	rs1175550	G	A	0.2321	Mean corpuscular volume
13476	151355858	1	0.042402	7.03e-13	0.30463	ebi-a-GCST90002350	rs2769270	A	G	0.027934	Neutrophil count
2603	78411324	5	0.037	7.17e-13	0.265	ieu-a-1077	rs7700970	T	C	NA	Selenium
172952	3691528	1	0.00421678	8.93e-13	0.0301332	ebi-a-GCST004601	rs1175550	G	A	0.2321	Red blood cell count
350473	3691528	1	0.00285295	1.6e-12	-0.0201589	ukb-d-30040_irnt	rs1175550	G	A	0.230896	Mean corpuscular volume
99071	63571121	15	0.00540953	4.7e-12	0.0374007	ukb-b-7500	rs7163368	C	T	0.213423	Spherical power (left)
461950	59538794	17	0.00133582	6e-12	0.00918856	ukb-b-10787	rs3785832	C	T	0.421332	Standing height
172952	142352978	3	0.00359182	1.28e-11	0.0243179	ebi-a-GCST004601	rs13074172	G	A	0.427	Red blood cell count
738615	46582018	17	0.0545	1.43e-11	-0.368	ieu-b-38	rs12951643	A	G	0.0843	systolic blood pressure
99380	63571121	15	0.00539425	2.5e-11	0.0360013	ukb-b-19994	rs7163368	C	T	0.213619	Spherical power (right)
350473	103063437	10	0.00261246	2.53e-10	-0.016525	ukb-d-30040_irnt	rs667707	C	T	0.29326	Mean corpuscular volume
2603	3691528	1	0.032	5.03e-10	0.198	ieu-a-1073	rs1175550	G	A	NA	Copper
454826	151344741	1	0.00180423	2.1e-09	-0.010808	ukb-b-7859	rs2769264	G	T	0.184426	Impedance of arm (right)
7357	78290682	5	0.0024	9.29e-09	0.0135	met-a-362	rs478651	C	T	0.5433	Betaine
450243	59538794	17	0.0019	1.17e-08	0.011	ebi-a-GCST90000025	rs3785832	C	T	0.4213	Appendicular lean mass
344104	63571121	15	0.0023732	1.45e-08	0.01345	ukb-d-30700_irnt	rs7163368	C	T	0.21056	Creatinine
7357	78411324	5	0.0031	1.83e-08	-0.0173	met-a-362	rs7700970	T	C	0.2589	Betaine
2874	78290682	5	0.028	3.18e-08	-0.154	ieu-a-1075	rs478651	C	T	NA	Selenium
2874	78411324	5	0.032	4.11e-08	0.173	ieu-a-1075	rs7700970	T	C	NA	Selenium
350475	3691528	1	0.00234272	4.23e-08	0.0128407	ukb-d-30030_irnt	rs1175550	G	A	0.230894	Haematocrit percentage
343992	63571121	15	0.0028408	4.41e-08	0.015549	ukb-d-30870_irnt	rs7163368	C	T	0.21057	Triglycerides
454753	151344741	1	0.00158599	8.1e-08	0.00850988	ukb-b-19520	rs2769264	G	T	0.184429	Arm fat-free mass (right)
435435	63796543	4	0.00142347	9e-08	0.00760838	ukb-b-1996	rs10023369	A	G	0.501347	Salad / raw vegetable intake
150708	142352978	3	0.004242	9.55e-08	0.022648	ebi-a-GCST90002364	rs13074172	G	A	0.24488	Red blood cell count
450243	103063437	10	0.0021	1.03e-07	-0.0111	ebi-a-GCST90000025	rs667707	C	T	0.2959	Appendicular lean mass
996	78290682	5	0.0440899	1.46e-07	-0.2335	prot-c-3172_28_2	rs478651	C	T	NA	ARSB
454840	151344741	1	0.00194224	1.5e-07	-0.0101977	ukb-b-19921	rs2769264	G	T	0.18444	Impedance of whole body
560498	63571121	15	0.002248	1.69e-07	0.011768	ieu-b-30	rs7163368	C	T	0.212969	white blood cell count
344729	103063437	10	0.00264218	1.8e-07	-0.0137883	ukb-d-30270_irnt	rs667707	C	T	0.2932	Mean sphered cell volume
454746	151344741	1	0.00158073	1.9e-07	0.00822699	ukb-b-16698	rs2769264	G	T	0.184429	Arm predicted mass (right)
344729	63571121	15	0.00290772	2.18e-07	0.0150726	ukb-d-30250_irnt	rs7163368	C	T	0.210436	Reticulocyte count
331279	151344741	1	0.00219804	2.55e-07	-0.0113287	ukb-a-272	rs2769264	G	T	0.184929	Impedance of arm (right)
2603	202542202	1	0.132	3.16e-07	0.673	ieu-a-1077	rs4950779	C	T	NA	Selenium
NA	63571121	15	0.0024272	3.2e-07	0.0124015	ieu-b-111	rs7163368	C	T	0.212715	triglycerides
2603	63796543	4	0.029	4.42e-07	-0.144	ieu-a-1077	rs10023369	A	G	NA	Selenium
454888	151344741	1	0.00159564	5.2e-07	0.0080068	ukb-b-14540	rs2769264	G	T	0.184433	Whole body water mass
317754	46582018	17	0.00441263	5.41e-07	-0.0221129	ukb-a-360	rs12951643	A	G	0.0846325	Systolic blood pressure automated reading
436419	46582018	17	0.00372975	5.5e-07	-0.0186737	ukb-b-20175	rs12951643	A	G	0.084363	Systolic blood pressure
461950	169674179	2	0.00217607	5.6e-07	-0.0108876	ukb-b-10787	rs2461362	T	C	0.09865	Standing height
454655	151344741	1	0.00161065	5.7e-07	0.00805404	ukb-b-9093	rs2769264	G	T	0.184431	Arm predicted mass (left)
NA	63571121	15	0.0023239	6.6e-07	-0.0115562	ieu-b-109	rs7163368	C	T	0.212691	HDL cholesterol
454874	151344741	1	0.00167565	6.7e-07	0.00832675	ukb-b-16446	rs2769264	G	T	0.184435	Basal metabolic rate
461113	46582018	17	0.00139322	6.8e-07	0.0069218	ukb-b-12930	rs12951643	A	G	0.084371	Mouth/teeth dental problems: Dentures
461880	46582018	17	0.00163541	7e-07	-0.00811441	ukb-b-14177	rs12951643	A	G	0.084374	Vascular/heart problems diagnosed by doctor: High blood pressure
454850	151344741	1	0.00159304	7.2e-07	0.00789529	ukb-b-13354	rs2769264	G	T	0.18443	Whole body fat-free mass
350472	103063437	10	0.00260638	7.65e-07	-0.0128861	ukb-d-30050_irnt	rs667707	C	T	0.293262	Mean corpuscular haemoglobin
2874	46582018	17	0.047	8.01e-07	-0.232	ieu-a-1075	rs12951643	A	G	NA	Selenium
454835	78411324	5	0.00145076	8.8e-07	0.00713203	ukb-b-12828	rs7700970	T	C	0.303867	Leg fat-free mass (right)
343524	57389998	2	0.0024325	9.54e-07	-0.011922	ukb-d-30710_irnt	rs9309294	G	A	0.41357	C-reactive protein
331221	151344741	1	0.00194756	9.91e-07	0.00953032	ukb-a-284	rs2769264	G	T	0.184929	Arm fat-free mass (right)
312215	63571121	15	0.0027759	9.91e-07	-0.013584	ukb-d-30830_irnt	rs7163368	C	T	0.21053	SHBG
454834	78411324	5	0.00144139	1.1e-06	0.00702665	ukb-b-14310	rs7700970	T	C	0.303867	Leg predicted mass (right)
2603	113948790	4	0.034	1.13e-06	-0.164	ieu-a-1073	rs10014072	G	A	NA	Copper
462933	78290682	5	0.000243275	1.2e-06	-0.00118227	ukb-b-7280	rs478651	C	T	0.53294	Non-cancer illness code
454672	151344741	1	0.00161709	1.2e-06	0.00785254	ukb-b-19925	rs2769264	G	T	0.184427	Arm fat-free mass (left)
97465	86505860	1	0.0063677	1.2e-06	-0.0308989	ukb-b-4717	rs566108	C	A	0.139476	Corneal resistance factor (left)
454850	151344741	1	0.00181073	1.3e-06	-0.00875075	ukb-b-19379	rs2769264	G	T	0.184435	Impedance of arm (left)
336474	59538794	17	0.00176348	1.32e-06	0.00853071	ukb-a-389	rs3785832	C	T	0.419878	Standing height
331216	151344741	1	0.00194067	1.32e-06	0.00938618	ukb-a-285	rs2769264	G	T	0.184929	Arm predicted mass (right)
2603	78290682	5	0.037	1.71e-06	-0.177	ieu-a-1077	rs478651	C	T	NA	Selenium
454857	151344741	1	0.00233122	1.8e-06	-0.0111384	ukb-b-14068	rs2769264	G	T	0.184434	Impedance of leg (left)
2603	59538794	17	0.031	1.82e-06	-0.146	ieu-a-1077	rs3785832	C	T	NA	Selenium
2874	55217132	16	0.032	1.98e-06	0.15	ieu-a-1075	rs2631524	G	A	NA	Selenium
454863	151344741	1	0.00231135	2.1e-06	-0.0109627	ukb-b-7376	rs2769264	G	T	0.184434	Impedance of leg (right)
454799	78411324	5	0.00144208	2.2e-06	0.0068207	ukb-b-17271	rs7700970	T	C	0.303874	Leg predicted mass (left)
454835	151344741	1	0.00167003	2.2e-06	0.00789884	ukb-b-12828	rs2769264	G	T	0.184431	Leg fat-free mass (right)
454805	78411324	5	0.00145161	2.3e-06	0.00685695	ukb-b-16099	rs7700970	T	C	0.303872	Leg fat-free mass (left)
331146	151344741	1	0.00197969	2.36e-06	0.00934423	ukb-a-289	rs2769264	G	T	0.184929	Arm predicted mass (left)
343992	63571121	15	0.0029351	2.48e-06	0.013824	ukb-d-30870_raw	rs7163368	C	T	0.21057	Triglycerides
692453	151344741	1	0.0022	2.5e-06	0.0105	ieu-b-40	rs2769264	G	T	0.1843	body mass index
2603	84583769	5	0.034	2.5e-06	-0.159	ieu-a-1073	rs12153606	T	G	NA	Copper
NA	111847985	3	0.01572	2.54e-06	-0.07396	ukb-e-2237_EAS	rs1492483	G	A	0.5787	Plays computer games
454834	151344741	1	0.00165926	2.6e-06	0.00779401	ukb-b-14310	rs2769264	G	T	0.184432	Leg predicted mass (right)
344729	63571121	15	0.00292386	2.66e-06	0.0137295	ukb-d-30300_irnt	rs7163368	C	T	0.210436	High light scatter reticulocyte count
314916	169674179	2	0.0050633	2.75e-06	0.023741	ukb-d-30740_raw	rs2461362	T	C	0.098838	Glucose
336107	151344741	1	0.00309182	2.94e-06	0.0144536	ukb-a-248	rs2769264	G	T	0.184929	Body mass index (BMI)
331159	151344741	1	0.00198712	2.99e-06	0.00928301	ukb-a-288	rs2769264	G	T	0.184929	Arm fat-free mass (left)
461460	151344741	1	0.00253914	3e-06	0.0118635	ukb-b-19953	rs2769264	G	T	0.184389	Body mass index (BMI)
NA	142352978	3	0.004944	3.21e-06	0.02302	bbj-a-50	rs13074172	G	A	0.2401	Red blood cell count
454799	151344741	1	0.00166002	3.4e-06	0.00771542	ukb-b-17271	rs2769264	G	T	0.18443	Leg predicted mass (left)
2603	63571121	15	0.034	4e-06	0.158	ieu-a-1077	rs7163368	C	T	NA	Selenium
2874	33017869	22	0.027	4e-06	0.123	ieu-a-1075	rs9609603	C	T	NA	Selenium
331284	151344741	1	0.00238331	4.04e-06	-0.0109862	ukb-a-269	rs2769264	G	T	0.184929	Impedance of whole body
454463	151344741	1	0.00158196	4.2e-06	0.00727897	ukb-b-9685	rs2769264	G	T	0.184438	Trunk predicted mass
431167	63571121	15	0.00234479	4.4e-06	0.0107629	ebi-a-GCST90002412	rs7163368	C	T	0.212399	Low density lipoprotein cholesterol levels
454805	151344741	1	0.00167097	4.4e-06	0.00767028	ukb-b-16099	rs2769264	G	T	0.184431	Leg fat-free mass (left)
52062	3691528	1	0.0323	4.5e-06	-0.1396	ieu-a-273	rs1175550	G	A	NA	Mean cell volume
454508	151344741	1	0.00158701	4.5e-06	0.00727797	ukb-b-17409	rs2769264	G	T	0.184444	Trunk fat-free mass
170641	63571121	15	0.00437833	4.8e-06	0.0200238	ebi-a-GCST004622	rs7163368	C	T	0.2117	Reticulocyte count
344728	63571121	15	0.00294537	5.85e-06	0.0133481	ukb-d-30240_irnt	rs7163368	C	T	0.210435	Reticulocyte percentage
2603	139727981	8	0.039	5.94e-06	-0.177	ieu-a-1073	rs9324493	G	A	NA	Copper
2603	56894225	11	0.056	5.98e-06	-0.251	ieu-a-1077	rs713550	T	G	NA	Selenium
331307	151344741	1	0.00207247	6.05e-06	0.00937708	ukb-a-268	rs2769264	G	T	0.184929	Basal metabolic rate
2603	170952630	5	0.328	6.27e-06	-1.483	ieu-a-1077	rs10475981	A	C	NA	Selenium
97653	86505860	1	0.0063508	6.3e-06	-0.028679	ukb-b-15178	rs566108	C	A	0.139245	Corneal resistance factor (right)
344182	169674179	2	0.003851	6.44e-06	0.017374	ukb-d-30750_irnt	rs2461362	T	C	0.098817	Glycated haemoglobin
3301	113948790	4	0.0275	6.46e-06	-0.1242	prot-a-844	rs10014072	G	A	0.6972	DnaJ homolog subfamily C member 15
2874	103063437	10	0.029	6.6e-06	0.13	ieu-a-1075	rs667707	C	T	NA	Selenium
172433	103063437	10	0.00388996	6.7e-06	-0.0175164	ebi-a-GCST004602	rs667707	C	T	0.2944	Mean corpuscular volume
454884	151344741	1	0.00255802	6.8e-06	0.0115127	ukb-b-2303	rs2769264	G	T	0.184432	Body mass index (BMI)
2603	142352978	3	0.027	7.16e-06	0.121	ieu-a-1073	rs13074172	G	A	NA	Copper
NA	63571121	15	0.0023893	7.2e-06	-0.0107212	ieu-b-107	rs7163368	C	T	0.212688	apolipoprotein A-I
336138	46582018	17	0.00163725	7.23e-06	0.00734638	ukb-a-433	rs12951643	A	G	0.0846325	Mouth/teeth dental problems: Dentures
331315	151344741	1	0.00197944	7.24e-06	0.00888116	ukb-a-267	rs2769264	G	T	0.184929	Whole body water mass
2603	57389998	2	0.03	7.72e-06	-0.133	ieu-a-1077	rs9309294	G	A	NA	Selenium
2603	82111288	12	0.029	7.91e-06	0.13	ieu-a-1077	rs11114989	A	G	NA	Selenium
2603	111847985	3	0.029	8.16e-06	0.13	ieu-a-1077	rs1492483	G	A	NA	Selenium
2603	169674179	2	0.054	8.2e-06	-0.242	ieu-a-1077	rs2461362	T	C	NA	Selenium
331291	151344741	1	0.00197655	8.5e-06	0.00880031	ukb-a-266	rs2769264	G	T	0.184929	Whole body fat-free mass
461950	78411324	5	0.00145564	9.2e-06	0.00645758	ukb-b-10787	rs7700970	T	C	0.303917	Standing height
2603	66379720	4	0.032	9.29e-06	-0.141	ieu-a-1077	rs4467633	C	T	NA	Selenium
457873	151344741	1	0.00152696	9.4e-06	-0.00676582	ukb-b-14203	rs2769264	G	T	0.184421	Hot drink temperature
558142	169674179	2	0.003078	9.63e-06	0.013629	ieu-b-30	rs2461362	T	C	0.099175	white blood cell count
462933	46582018	17	0.00161274	9.7e-06	-0.00713333	ukb-b-14057	rs12951643	A	G	0.084402	Non-cancer illness code
116666	142352978	3	0.00401259	9.8e-06	0.0177958	ebi-a-GCST006804	rs13074172	G	A	0.427764	Red cell distribution width
2603	86505860	1	0.045	9.92e-06	0.201	ieu-a-1077	rs566108	C	A	NA	Selenium
2603	32270448	15	0.031	9.95e-06	-0.139	ieu-a-1077	rs4779561	T	C	NA	Selenium
2874	46582018	17	0.047	8.01e-07	-0.232	ieu-a-1075	rs12951643	A	G	NA	Selenium
454835	78411324	5	0.00145076	8.8e-07	0.00713203	ukb-b-12828	rs7700970	T	C	0.303867	Leg fat-free mass (right)
343524	57389998	2	0.0024325	9.54e-07	-0.011922	ukb-d-30710_irnt	rs9309294	G	A	0.41357	C-reactive protein
331221	151344741	1	0.00194756	9.91e-07	0.00953032	ukb-a-284	rs2769264	G	T	0.184929	Arm fat-free mass (right)
312215	63571121	15	0.0027759	9.91e-07	-0.013584	ukb-d-30830_irnt	rs7163368	C	T	0.21053	SHBG
454834	78411324	5	0.00144139	1.1e-06	0.00702665	ukb-b-14310	rs7700970	T	C	0.303867	Leg predicted mass (right)
2603	113948790	4	0.034	1.13e-06	-0.164	ieu-a-1073	rs10014072	G	A	NA	Copper
462933	78290682	5	0.000243275	1.2e-06	-0.00118227	ukb-b-7280	rs478651	C	T	0.53294	Non-cancer illness code
454672	151344741	1	0.00161709	1.2e-06	0.00785254	ukb-b-19925	rs2769264	G	T	0.184427	Arm fat-free mass (left)
97465	86505860	1	0.0063677	1.2e-06	-0.0308989	ukb-b-4717	rs566108	C	A	0.139476	Corneal resistance factor (left)
454850	151344741	1	0.00181073	1.3e-06	-0.00875075	ukb-b-19379	rs2769264	G	T	0.184435	Impedance of arm (left)
336474	59538794	17	0.00176348	1.32e-06	0.00853071	ukb-a-389	rs3785832	C	T	0.419878	Standing height
331216	151344741	1	0.00194067	1.32e-06	0.00938618	ukb-a-285	rs2769264	G	T	0.184929	Arm predicted mass (right)
2603	78290682	5	0.037	1.71e-06	-0.177	ieu-a-1077	rs478651	C	T	NA	Selenium
454857	151344741	1	0.00233122	1.8e-06	-0.0111384	ukb-b-14068	rs2769264	G	T	0.184434	Impedance of leg (left)
2603	59538794	17	0.031	1.82e-06	-0.146	ieu-a-1077	rs3785832	C	T	NA	Selenium
NA	151344741	1	0.07091	1.83e-06	0.3384	ukb-e-recode406_CSA	rs2769264	G	T	0.7885	NA
NA	151344741	1	0.07091	1.83e-06	0.3384	ukb-e-recode55_CSA	rs2769264	G	T	0.7885	NA
2874	55217132	16	0.032	1.98e-06	0.15	ieu-a-1075	rs2631524	G	A	NA	Selenium
454863	151344741	1	0.00231135	2.1e-06	-0.0109627	ukb-b-7376	rs2769264	G	T	0.184434	Impedance of leg (right)
454799	78411324	5	0.00144208	2.2e-06	0.0068207	ukb-b-17271	rs7700970	T	C	0.303874	Leg predicted mass (left)
454835	151344741	1	0.00167003	2.2e-06	0.00789884	ukb-b-12828	rs2769264	G	T	0.184431	Leg fat-free mass (right)
454805	78411324	5	0.00145161	2.3e-06	0.00685695	ukb-b-16099	rs7700970	T	C	0.303872	Leg fat-free mass (left)
331146	151344741	1	0.00197969	2.36e-06	0.00934423	ukb-a-289	rs2769264	G	T	0.184929	Arm predicted mass (left)
343992	63571121	15	0.0029351	2.48e-06	0.013824	ukb-d-30870_raw	rs7163368	C	T	0.21057	Triglycerides
692453	151344741	1	0.0022	2.5e-06	0.0105	ieu-b-40	rs2769264	G	T	0.1843	body mass index
2603	84583769	5	0.034	2.5e-06	-0.159	ieu-a-1073	rs12153606	T	G	NA	Copper
NA	111847985	3	0.01572	2.54e-06	-0.07396	ukb-e-2237_EAS	rs1492483	G	A	0.5787	Plays computer games
454834	151344741	1	0.00165926	2.6e-06	0.00779401	ukb-b-14310	rs2769264	G	T	0.184432	Leg predicted mass (right)
344729	63571121	15	0.00292386	2.66e-06	0.0137295	ukb-d-30300_irnt	rs7163368	C	T	0.210436	High light scatter reticulocyte count
314916	169674179	2	0.0050633	2.75e-06	0.023741	ukb-d-30740_raw	rs2461362	T	C	0.098838	Glucose
336107	151344741	1	0.00309182	2.94e-06	0.0144536	ukb-a-248	rs2769264	G	T	0.184929	Body mass index (BMI)
331159	151344741	1	0.00198712	2.99e-06	0.00928301	ukb-a-288	rs2769264	G	T	0.184929	Arm fat-free mass (left)
461460	151344741	1	0.00253914	3e-06	0.0118635	ukb-b-19953	rs2769264	G	T	0.184389	Body mass index (BMI)
NA	142352978	3	0.004944	3.21e-06	0.02302	bbj-a-50	rs13074172	G	A	0.2401	Red blood cell count
454799	151344741	1	0.00166002	3.4e-06	0.00771542	ukb-b-17271	rs2769264	G	T	0.18443	Leg predicted mass (left)
2603	63571121	15	0.034	4e-06	0.158	ieu-a-1077	rs7163368	C	T	NA	Selenium
2874	33017869	22	0.027	4e-06	0.123	ieu-a-1075	rs9609603	C	T	NA	Selenium
331284	151344741	1	0.00238331	4.04e-06	-0.0109862	ukb-a-269	rs2769264	G	T	0.184929	Impedance of whole body
454463	151344741	1	0.00158196	4.2e-06	0.00727897	ukb-b-9685	rs2769264	G	T	0.184438	Trunk predicted mass
431167	63571121	15	0.00234479	4.4e-06	0.0107629	ebi-a-GCST90002412	rs7163368	C	T	0.212399	Low density lipoprotein cholesterol levels
454805	151344741	1	0.00167097	4.4e-06	0.00767028	ukb-b-16099	rs2769264	G	T	0.184431	Leg fat-free mass (left)
52062	3691528	1	0.0323	4.5e-06	-0.1396	ieu-a-273	rs1175550	G	A	NA	Mean cell volume
454508	151344741	1	0.00158701	4.5e-06	0.00727797	ukb-b-17409	rs2769264	G	T	0.184444	Trunk fat-free mass
170641	63571121	15	0.00437833	4.8e-06	0.0200238	ebi-a-GCST004622	rs7163368	C	T	0.2117	Reticulocyte count
344728	63571121	15	0.00294537	5.85e-06	0.0133481	ukb-d-30240_irnt	rs7163368	C	T	0.210435	Reticulocyte percentage
2603	139727981	8	0.039	5.94e-06	-0.177	ieu-a-1073	rs9324493	G	A	NA	Copper
2603	56894225	11	0.056	5.98e-06	-0.251	ieu-a-1077	rs713550	T	G	NA	Selenium
331307	151344741	1	0.00207247	6.05e-06	0.00937708	ukb-a-268	rs2769264	G	T	0.184929	Basal metabolic rate
2603	170952630	5	0.328	6.27e-06	-1.483	ieu-a-1077	rs10475981	A	C	NA	Selenium
97653	86505860	1	0.0063508	6.3e-06	-0.028679	ukb-b-15178	rs566108	C	A	0.139245	Corneal resistance factor (right)
344182	169674179	2	0.003851	6.44e-06	0.017374	ukb-d-30750_irnt	rs2461362	T	C	0.098817	Glycated haemoglobin
3301	113948790	4	0.0275	6.46e-06	-0.1242	prot-a-844	rs10014072	G	A	0.6972	DnaJ homolog subfamily C member 15
2874	103063437	10	0.029	6.6e-06	0.13	ieu-a-1075	rs667707	C	T	NA	Selenium
172433	103063437	10	0.00388996	6.7e-06	-0.0175164	ebi-a-GCST004602	rs667707	C	T	0.2944	Mean corpuscular volume
454884	151344741	1	0.00255802	6.8e-06	0.0115127	ukb-b-2303	rs2769264	G	T	0.184432	Body mass index (BMI)
2603	142352978	3	0.027	7.16e-06	0.121	ieu-a-1073	rs13074172	G	A	NA	Copper
NA	63571121	15	0.0023893	7.2e-06	-0.0107212	ieu-b-107	rs7163368	C	T	0.212688	apolipoprotein A-I
336138	46582018	17	0.00163725	7.23e-06	0.00734638	ukb-a-433	rs12951643	A	G	0.0846325	Mouth/teeth dental problems: Dentures
331315	151344741	1	0.00197944	7.24e-06	0.00888116	ukb-a-267	rs2769264	G	T	0.184929	Whole body water mass
2603	57389998	2	0.03	7.72e-06	-0.133	ieu-a-1077	rs9309294	G	A	NA	Selenium
2603	82111288	12	0.029	7.91e-06	0.13	ieu-a-1077	rs11114989	A	G	NA	Selenium
2603	111847985	3	0.029	8.16e-06	0.13	ieu-a-1077	rs1492483	G	A	NA	Selenium
2603	169674179	2	0.054	8.2e-06	-0.242	ieu-a-1077	rs2461362	T	C	NA	Selenium
331291	151344741	1	0.00197655	8.5e-06	0.00880031	ukb-a-266	rs2769264	G	T	0.184929	Whole body fat-free mass
461950	78411324	5	0.00145564	9.2e-06	0.00645758	ukb-b-10787	rs7700970	T	C	0.303917	Standing height
2603	66379720	4	0.032	9.29e-06	-0.141	ieu-a-1077	rs4467633	C	T	NA	Selenium
457873	151344741	1	0.00152696	9.4e-06	-0.00676582	ukb-b-14203	rs2769264	G	T	0.184421	Hot drink temperature
558142	169674179	2	0.003078	9.63e-06	0.013629	ieu-b-30	rs2461362	T	C	0.099175	white blood cell count
462933	46582018	17	0.00161274	9.7e-06	-0.00713333	ukb-b-14057	rs12951643	A	G	0.084402	Non-cancer illness code
116666	142352978	3	0.00401259	9.8e-06	0.0177958	ebi-a-GCST006804	rs13074172	G	A	0.427764	Red cell distribution width
2603	86505860	1	0.045	9.92e-06	0.201	ieu-a-1077	rs566108	C	A	NA	Selenium
2603	32270448	15	0.031	9.95e-06	-0.139	ieu-a-1077	rs4779561	T	C	NA	Selenium

## Sheet: Table S5
Supplementary Table 5
Outcome abbreviation	A2_ALL_EUR	B1_ALL_EUR	B2_ALL_EUR	C2_ALL_EUR
Outcome name	Very severe respiratory confirmed COVID-19 vs. population	Hospitalized COVID-19 vs. not hospitalized COVID-19	Hospitalized COVID-19 vs. population	COVID-19 vs. population
Case definition	Critically ill COVID-19 cases defined as those who required respiratory support in hospital or who were deceased due to the disease	Cases with moderate or severe COVID-19 defined as those hospitalized due to symptoms associated with the infection	Cases with moderate or severe COVID-19 defined as those hospitalized due to symptoms associated with the infection	All cases with reported SARS-CoV-2 infection
Control definition	Genetically ancestry-matched samples without known SARS-CoV-2 infection	Genetically ancestry-matched samples with past SARS-CoV-2 infection not requiring hospitalization	Genetically ancestry-matched samples without known SARS-CoV-2 infection	Genetically ancestry-matched samples without known SARS-CoV-2 infection
Diagnosis	COVID-19 infection was ascertained in either of 4 ways: 1) positive test result (including RT-qPCR, antibody test); 2) electronic health record entry with a relevant ICD code; 3) clinically confirmed COVID-19; 4) self-reported by patients
Number of cases	5101	4829	9986	38984
Number of controls	1383241	11816	1877672	1644784
Case definitions are sourced from the COVID-19 Host Genetics Initiative

## Sheet: Table S6
Supplementary Table 6
			Minimum detectable odds ratio at 80% power
Micronutrient	n SNPs	R2	SARS-CoV-2 infection	COVID-19 hospitalization (vs non-hospitalized)	COVID-19 hospitalization (vs population)	very severe COVID-19
Zinc1	2	0.0459	0.93	0.79	0.87	0.81
Selenium meta-analysis1	2	0.0225	0.91	0.72	0.82	0.75
Copper1	2	0.046	0.93	0.79	0.87	0.81
Vitamin K1 (logn nmol/L)	2	0.0306	0.92	0.72	0.84	0.77
1Odds ratio of the outcome are given per standard deviation increase in the exposure

## Sheet: Table S7
Supplementary Table 7
			Minimum detectable odds ratio at 80% power
Micronutrient	n SNPs	R2	SARS-CoV-2 infection	COVID-19 hospitalization (vs non-hospitalized)	COVID-19 hospitalization (vs population)	very severe COVID-19
Zinc1	12	0.14	0.96	0.87	0.92	0.89
Selenium ALSPAC1	12	0.1093	0.95	0.86	0.91	0.88
Selenium QIMR1	15	0.1326	0.96	0.87	0.92	0.89
Copper1	7	0.1003	0.95	0.86	0.91	0.87
1Odds ratio of the outcome are given per standard deviation increase in the exposure

## Sheet: Table S8
Supplementary Table 8
exposure	outcome	method	nsnp	b	se	pval	adj pval	lo ci	up ci	or	or lci95	or uci95
Cu subsignificant	SARS-CoV-2 infection	MR Egger	7	-0.0844682	0.0757582	0.315565	1	-0.232954	0.0640179	0.919001	0.79219	1.06611
Cu subsignificant	SARS-CoV-2 infection	Weighted median	7	0.0290707	0.0312924	0.352888	1	-0.0322624	0.0904037	1.0295	0.968252	1.09462
Cu subsignificant	SARS-CoV-2 infection	Inverse variance weighted	7	0.0127551	0.0291844	0.662073	1	-0.0444463	0.0699565	1.01	0.96	1.07
Cu subsignificant	SARS-CoV-2 infection	Weighted mode	7	0.0479134	0.0558998	0.42428	1	-0.0616503	0.157477	1.04908	0.940212	1.17055
Cu subsignificant	Hospitalized (ver. non-hospitalized)	MR Egger	7	-0.0455352	0.189293	0.819453	1	-0.41655	0.325479	0.955486	0.659318	1.38469
Cu subsignificant	Hospitalized (ver. non-hospitalized)	Weighted median	7	0.0183077	0.0826567	0.82471	1	-0.143699	0.180315	1.01848	0.866148	1.19759
Cu subsignificant	Hospitalized (ver. non-hospitalized)	Inverse variance weighted	7	-0.0180833	0.0685685	0.791991	1	-0.152478	0.116311	0.98	0.86	1.12
Cu subsignificant	Hospitalized (ver. non-hospitalized)	Weighted mode	7	0.0242463	0.0923264	0.801632	1	-0.156713	0.205206	1.02454	0.854949	1.22778
Cu subsignificant	Hospitalized (ver. population)	MR Egger	7	-0.0907136	0.117234	0.474039	1	-0.320493	0.139066	0.913279	0.725791	1.1492
Cu subsignificant	Hospitalized (ver. population)	Weighted median	7	-0.00155038	0.055936	0.977888	1	-0.111185	0.108084	0.998451	0.894773	1.11414
Cu subsignificant	Hospitalized (ver. population)	Inverse variance weighted	7	-0.00985405	0.042301	0.815799	1	-0.092764	0.0730559	0.99	0.91	1.08
Cu subsignificant	Hospitalized (ver. population)	Weighted mode	7	0.0270947	0.0839216	0.757758	1	-0.137392	0.191581	1.02747	0.871629	1.21116
Cu subsignificant	Very severe COVID-19	MR Egger	7	-0.138281	0.178579	0.473735	1	-0.488295	0.211733	0.870854	0.613672	1.23582
Cu subsignificant	Very severe COVID-19	Weighted median	7	-0.0342094	0.0829373	0.679993	1	-0.196766	0.128348	0.966369	0.821382	1.13695
Cu subsignificant	Very severe COVID-19	Inverse variance weighted	7	-0.0634123	0.0645265	0.325739	1	-0.189884	0.0630597	0.94	0.83	1.07
Cu subsignificant	Very severe COVID-19	Weighted mode	7	-0.000226186	0.112289	0.998458	1	-0.220312	0.219859	0.999774	0.802269	1.2459
Cu	Hospitalized (ver. non-hospitalized)	Inverse variance weighted	2	-0.0212816	0.106961	0.842289	1	-0.230924	0.188361	0.98	0.79	1.21
Cu	Hospitalized (ver. population)	Inverse variance weighted	2	0.0664112	0.0968669	0.49297	1	-0.123448	0.25627	1.07	0.88	1.29
Cu	SARS-CoV-2 infection	Inverse variance weighted	2	0.0643303	0.0337831	0.0568819	0.910111	-0.00188452	0.130545	1.07	1	1.14
Cu	Very severe COVID-19	Inverse variance weighted	2	0.118119	0.162232	0.466559	1	-0.199855	0.436093	1.13	0.82	1.55
Se meta	Hospitalized (ver. non-hospitalized)	Inverse variance weighted	2	-0.0953929	0.101411	0.346883	1	-0.294159	0.103373	0.91	0.75	1.11
Se meta	Hospitalized (ver. population)	Inverse variance weighted	2	-0.0218715	0.0599346	0.715169	1	-0.139343	0.0956003	0.98	0.87	1.1
Se meta	SARS-CoV-2 infectionn	Inverse variance weighted	2	0.0268632	0.0403817	0.505901	1	-0.0522848	0.106011	1.03	0.95	1.11
Se meta	Very severe COVID-19	Inverse variance weighted	2	-0.0147724	0.0860093	0.863631	1	-0.183351	0.153806	0.99	0.83	1.17
Se ALSPAC subsignificant	Hospitalized (ver. non-hospitalized)	MR Egger	12	0.114639	0.244971	0.649838	1	-0.365504	0.594783	1.12147	0.693847	1.81264
Se ALSPAC subsignificant	Hospitalized (ver. non-hospitalized)	Weighted median	12	-0.00213039	0.0935498	0.981831	1	-0.185488	0.181227	0.997872	0.830699	1.19869
Se ALSPAC subsignificant	Hospitalized (ver. non-hospitalized)	Inverse variance weighted	12	0.0137153	0.0696105	0.843805	1	-0.122721	0.150152	1.01	0.88	1.16
Se ALSPAC subsignificant	Hospitalized (ver. non-hospitalized)	Weighted mode	12	0.00826113	0.114672	0.943862	1	-0.216495	0.233017	1.0083	0.805336	1.2624
Se ALSPAC subsignificant	Hospitalized (ver. population)	MR Egger	12	-0.12115	0.133599	0.385833	1	-0.383004	0.140704	0.885901	0.68181	1.15108
Se ALSPAC subsignificant	Hospitalized (ver. population)	Weighted median	12	0.0105175	0.0542278	0.846215	1	-0.095769	0.116804	1.01057	0.908674	1.1239
Se ALSPAC subsignificant	Hospitalized (ver. population)	Inverse variance weighted	12	0.03015	0.040213	0.453401	1	-0.0486675	0.108967	1.03	0.95	1.12
Se ALSPAC subsignificant	Hospitalized (ver. population)	Weighted mode	12	0.00777371	0.0624307	0.903152	1	-0.11459	0.130138	1.0078	0.891731	1.13899
Se ALSPAC subsignificant	SARS-CoV-2 infection	MR Egger	12	-0.125408	0.0688287	0.0984495	1	-0.260312	0.00949612	0.882137	0.770811	1.00954
Se ALSPAC subsignificant	SARS-CoV-2 infection	Weighted median	12	-0.0207615	0.0278554	0.456072	1	-0.075358	0.0338351	0.979453	0.927411	1.03441
Se ALSPAC subsignificant	SARS-CoV-2 infection	Inverse variance weighted	12	-0.00774628	0.0204063	0.70424	1	-0.0477426	0.03225	0.99	0.95	1.03
Se ALSPAC subsignificant	SARS-CoV-2 infection	Weighted mode	12	-0.0388195	0.0372041	0.319142	1	-0.111739	0.0341004	0.961924	0.894277	1.03469
Se ALSPAC subsignificant	Very severe COVID-19	MR Egger	12	-0.158651	0.194781	0.434321	1	-0.540423	0.22312	0.853294	0.582502	1.24997
Se ALSPAC subsignificant	Very severe COVID-19	Weighted median	12	0.046382	0.0826629	0.574731	1	-0.115637	0.208401	1.04747	0.890798	1.23171
Se ALSPAC subsignificant	Very severe COVID-19	Inverse variance weighted	12	0.0539724	0.0600629	0.368867	1	-0.0637509	0.171696	1.06	0.94	1.19
Se ALSPAC subsignificant	Very severe COVID-19	Weighted mode	12	0.0516785	0.0969654	0.604662	1	-0.138374	0.241731	1.05304	0.870773	1.27345
Se QIMR subsignificant	Hospitalized (ver. non-hospitalized)	MR Egger	15	-0.103842	0.0828522	0.232154	1	-0.266233	0.058548	0.901367	0.766261	1.0603
Se QIMR subsignificant	Hospitalized (ver. non-hospitalized)	Weighted median	15	-0.0145777	0.0720761	0.839718	1	-0.155847	0.126691	0.985528	0.85569	1.13507
Se QIMR subsignificant	Hospitalized (ver. non-hospitalized)	Inverse variance weighted	15	0.0433646	0.0529069	0.412421	1	-0.0603328	0.147062	1.04	0.94	1.16
Se QIMR subsignificant	Hospitalized (ver. non-hospitalized)	Weighted mode	15	-0.0586397	0.092633	0.536916	1	-0.2402	0.122921	0.943046	0.78647	1.13079
Se QIMR subsignificant	Hospitalized (ver. population)	MR Egger	15	0.103584	0.0443684	0.0362495	0.579993	0.0166215	0.190546	1.10914	1.01676	1.20991
Se QIMR subsignificant	Hospitalized (ver. population)	Weighted median	15	0.0616398	0.0400508	0.123795	1	-0.0168598	0.140139	1.06358	0.983282	1.15043
Se QIMR subsignificant	Hospitalized (ver. population)	Inverse variance weighted	15	0.057152	0.0268179	0.0330797	0.529275	0.00458895	0.109715	1.06	1	1.12
Se QIMR subsignificant	Hospitalized (ver. population)	Weighted mode	15	0.0656932	0.046594	0.180395	1	-0.025631	0.157017	1.0679	0.974695	1.17002
Se QIMR subsignificant	SARS-CoV-2 infection	MR Egger	15	0.00112391	0.0241662	0.963613	1	-0.0462419	0.0484897	1.00112	0.954811	1.04968
Se QIMR subsignificant	SARS-CoV-2 infection	Weighted median	15	-0.00851487	0.0208856	0.683501	1	-0.0494507	0.032421	0.991521	0.951752	1.03295
Se QIMR subsignificant	SARS-CoV-2 infection	Inverse variance weighted	15	0.0004486	0.0139729	0.974388	1	-0.0269384	0.0278356	1	0.97	1.03
Se QIMR subsignificant	SARS-CoV-2 infection	Weighted mode	15	-0.00389424	0.0238167	0.872455	1	-0.050575	0.0427866	0.996113	0.950683	1.04372
Se QIMR subsignificant	Very severe COVID-19	MR Egger	15	0.091101	0.0622779	0.167272	1	-0.0309638	0.213166	1.09538	0.969511	1.23759
Se QIMR subsignificant	Very severe COVID-19	Weighted median	15	0.0781255	0.0583698	0.180747	1	-0.0362793	0.19253	1.08126	0.964371	1.21231
Se QIMR subsignificant	Very severe COVID-19	Inverse variance weighted	15	0.0705067	0.0388179	0.0693173	1	-0.00557634	0.14659	1.07	0.99	1.16
Se QIMR subsignificant	Very severe COVID-19	Weighted mode	15	0.0912036	0.0588216	0.143325	1	-0.0240867	0.206494	1.09549	0.976201	1.22936
vitamin K1	Hospitalized (ver. non-hospitalized)	MR Egger	3	0.127364	0.169414	0.589607	1	-0.204689	0.459416	1.13583	0.814901	1.58315
vitamin K1	Hospitalized (ver. non-hospitalized)	Weighted median	3	0.0149441	0.114147	0.895839	1	-0.208784	0.238672	1.01506	0.811571	1.26956
vitamin K1	Hospitalized (ver. non-hospitalized)	Inverse variance weighted	3	0.0554431	0.0964089	0.565236	1	-0.133518	0.244405	1.06	0.88	1.28
vitamin K1	Hospitalized (ver. non-hospitalized)	Weighted mode	3	-0.00579442	0.132667	0.969131	1	-0.265822	0.254234	0.994222	0.766575	1.28947
vitamin K1	Hospitalized (ver. population)	MR Egger	3	0.0339062	0.0973551	0.786646	1	-0.15691	0.224722	1.03449	0.854781	1.25197
vitamin K1	Hospitalized (ver. population)	Weighted median	3	-0.00249628	0.0646997	0.969223	1	-0.129308	0.124315	0.997507	0.878704	1.13237
vitamin K1	Hospitalized (ver. population)	Inverse variance weighted	3	-0.0248944	0.0568622	0.66153	1	-0.136344	0.0865555	0.98	0.87	1.09
vitamin K1	Hospitalized (ver. population)	Weighted mode	3	-0.00237913	0.0748094	0.977518	1	-0.149006	0.144247	0.997624	0.861564	1.15517
vitamin K1	SARS-CoV-2 infection	MR Egger	3	0.0287943	0.0511319	0.673495	1	-0.0714243	0.129013	1.02921	0.931067	1.1377
vitamin K1	SARS-CoV-2 infection	Weighted median	3	-0.00389326	0.0351115	0.911709	1	-0.0727118	0.0649253	0.996114	0.929869	1.06708
vitamin K1	SARS-CoV-2 infection	Inverse variance weighted	3	-0.0121884	0.0292322	0.676713	1	-0.0694835	0.0451067	0.99	0.93	1.05
vitamin K1	SARS-CoV-2 infection	Weighted mode	3	0.00208292	0.0405953	0.963743	1	-0.0774839	0.0816497	1.00209	0.925442	1.08508
vitamin K1	Very severe COVID-19	MR Egger	3	0.138012	0.162256	0.55129	1	-0.180009	0.456033	1.14799	0.835262	1.5778
vitamin K1	Very severe COVID-19	Weighted median	3	-0.00685128	0.110126	0.950393	1	-0.222699	0.208996	0.993172	0.800356	1.23244
vitamin K1	Very severe COVID-19	Inverse variance weighted	3	-0.0778819	0.128838	0.545514	1	-0.330404	0.17464	0.93	0.72	1.19
vitamin K1	Very severe COVID-19	Weighted mode	3	0.00649416	0.113309	0.959506	1	-0.215592	0.22858	1.00652	0.806064	1.25681
Zn subsignificant	Hospitalized (ver. non-hospitalized)	MR Egger	12	-0.104238	0.21841	0.643436	1	-0.532322	0.323845	0.90101	0.58724	1.38243
Zn subsignificant	Hospitalized (ver. non-hospitalized)	Weighted median	12	0.0210844	0.0831803	0.799899	1	-0.141949	0.184118	1.02131	0.867665	1.20216
Zn subsignificant	Hospitalized (ver. non-hospitalized)	Inverse variance weighted	12	-0.0273007	0.0679715	0.687942	1	-0.160525	0.105923	0.97	0.85	1.11
Zn subsignificant	Hospitalized (ver. non-hospitalized)	Weighted mode	12	0.042096	0.101158	0.685312	1	-0.156175	0.240367	1.04299	0.85541	1.27172
Zn subsignificant	Hospitalized (ver. population)	MR Egger	12	-0.207362	0.112531	0.0951754	1	-0.427923	0.0131989	0.812725	0.651861	1.01329
Zn subsignificant	Hospitalized (ver. population)	Weighted median	12	0.00598184	0.0517713	0.908014	1	-0.0954899	0.107454	1.006	0.908928	1.11344
Zn subsignificant	Hospitalized (ver. population)	Inverse variance weighted	12	-0.0198511	0.0403659	0.622875	1	-0.0989683	0.0592661	0.98	0.91	1.06
Zn subsignificant	Hospitalized (ver. population)	Weighted mode	12	-0.00592735	0.0625742	0.926237	1	-0.128573	0.116718	0.99409	0.87935	1.1238
Zn subsignificant	SARS-CoV-2 infection	MR Egger	12	0.00565568	0.056547	0.922307	1	-0.105177	0.116488	1.00567	0.900166	1.12354
Zn subsignificant	SARS-CoV-2 infection	Weighted median	12	-0.0124032	0.0247519	0.616299	1	-0.0609169	0.0361104	0.987673	0.940901	1.03677
Zn subsignificant	SARS-CoV-2 infection	Inverse variance weighted	12	0.012697	0.0183492	0.488959	1	-0.0232674	0.0486614	1.01	0.98	1.05
Zn subsignificant	SARS-CoV-2 infection	Weighted mode	12	-0.0194012	0.0330724	0.569296	1	-0.0842231	0.0454207	0.980786	0.919226	1.04647
Zn subsignificant	Very severe COVID-19	MR Egger	12	-0.123313	0.194809	0.540942	1	-0.505139	0.258513	0.883987	0.603422	1.295
Zn subsignificant	Very severe COVID-19	Weighted median	12	-0.130667	0.0794865	0.100199	1	-0.286461	0.0251266	0.87751	0.750917	1.02544
Zn subsignificant	Very severe COVID-19	Inverse variance weighted	12	-0.0864957	0.0617741	0.161455	1	-0.207573	0.0345816	0.92	0.81	1.04
Zn subsignificant	Very severe COVID-19	Weighted mode	12	-0.111171	0.103866	0.307395	1	-0.314749	0.0924068	0.894786	0.729972	1.09681
Zn	Hospitalized (ver. non-hospitalized)	Inverse variance weighted	2	-0.00691995	0.188905	0.970779	1	-0.377174	0.363334	0.99	0.69	1.44
Zn	Hospitalized (ver. population)	Inverse variance weighted	2	0.0596147	0.136965	0.663377	1	-0.208836	0.328065	1.06	0.81	1.39
Zn	SARS-CoV-2 infection	Inverse variance weighted	2	-0.0334134	0.0556665	0.548345	1	-0.14252	0.075693	0.97	0.87	1.08
Zn	Very severe COVID-19	Inverse variance weighted	2	0.189681	0.218679	0.385725	1	-0.238929	0.618292	1.21	0.79	1.86
