# Supplementary figures and images for: The Effect of Circulating Zinc, Selenium, Copper and Vitamin K1 on COVID-19 Outcomes: A Mendelian Randomization Study
Source: MDPI journal article supplement (doi:10.3390/nu14020233), 2022-01-06

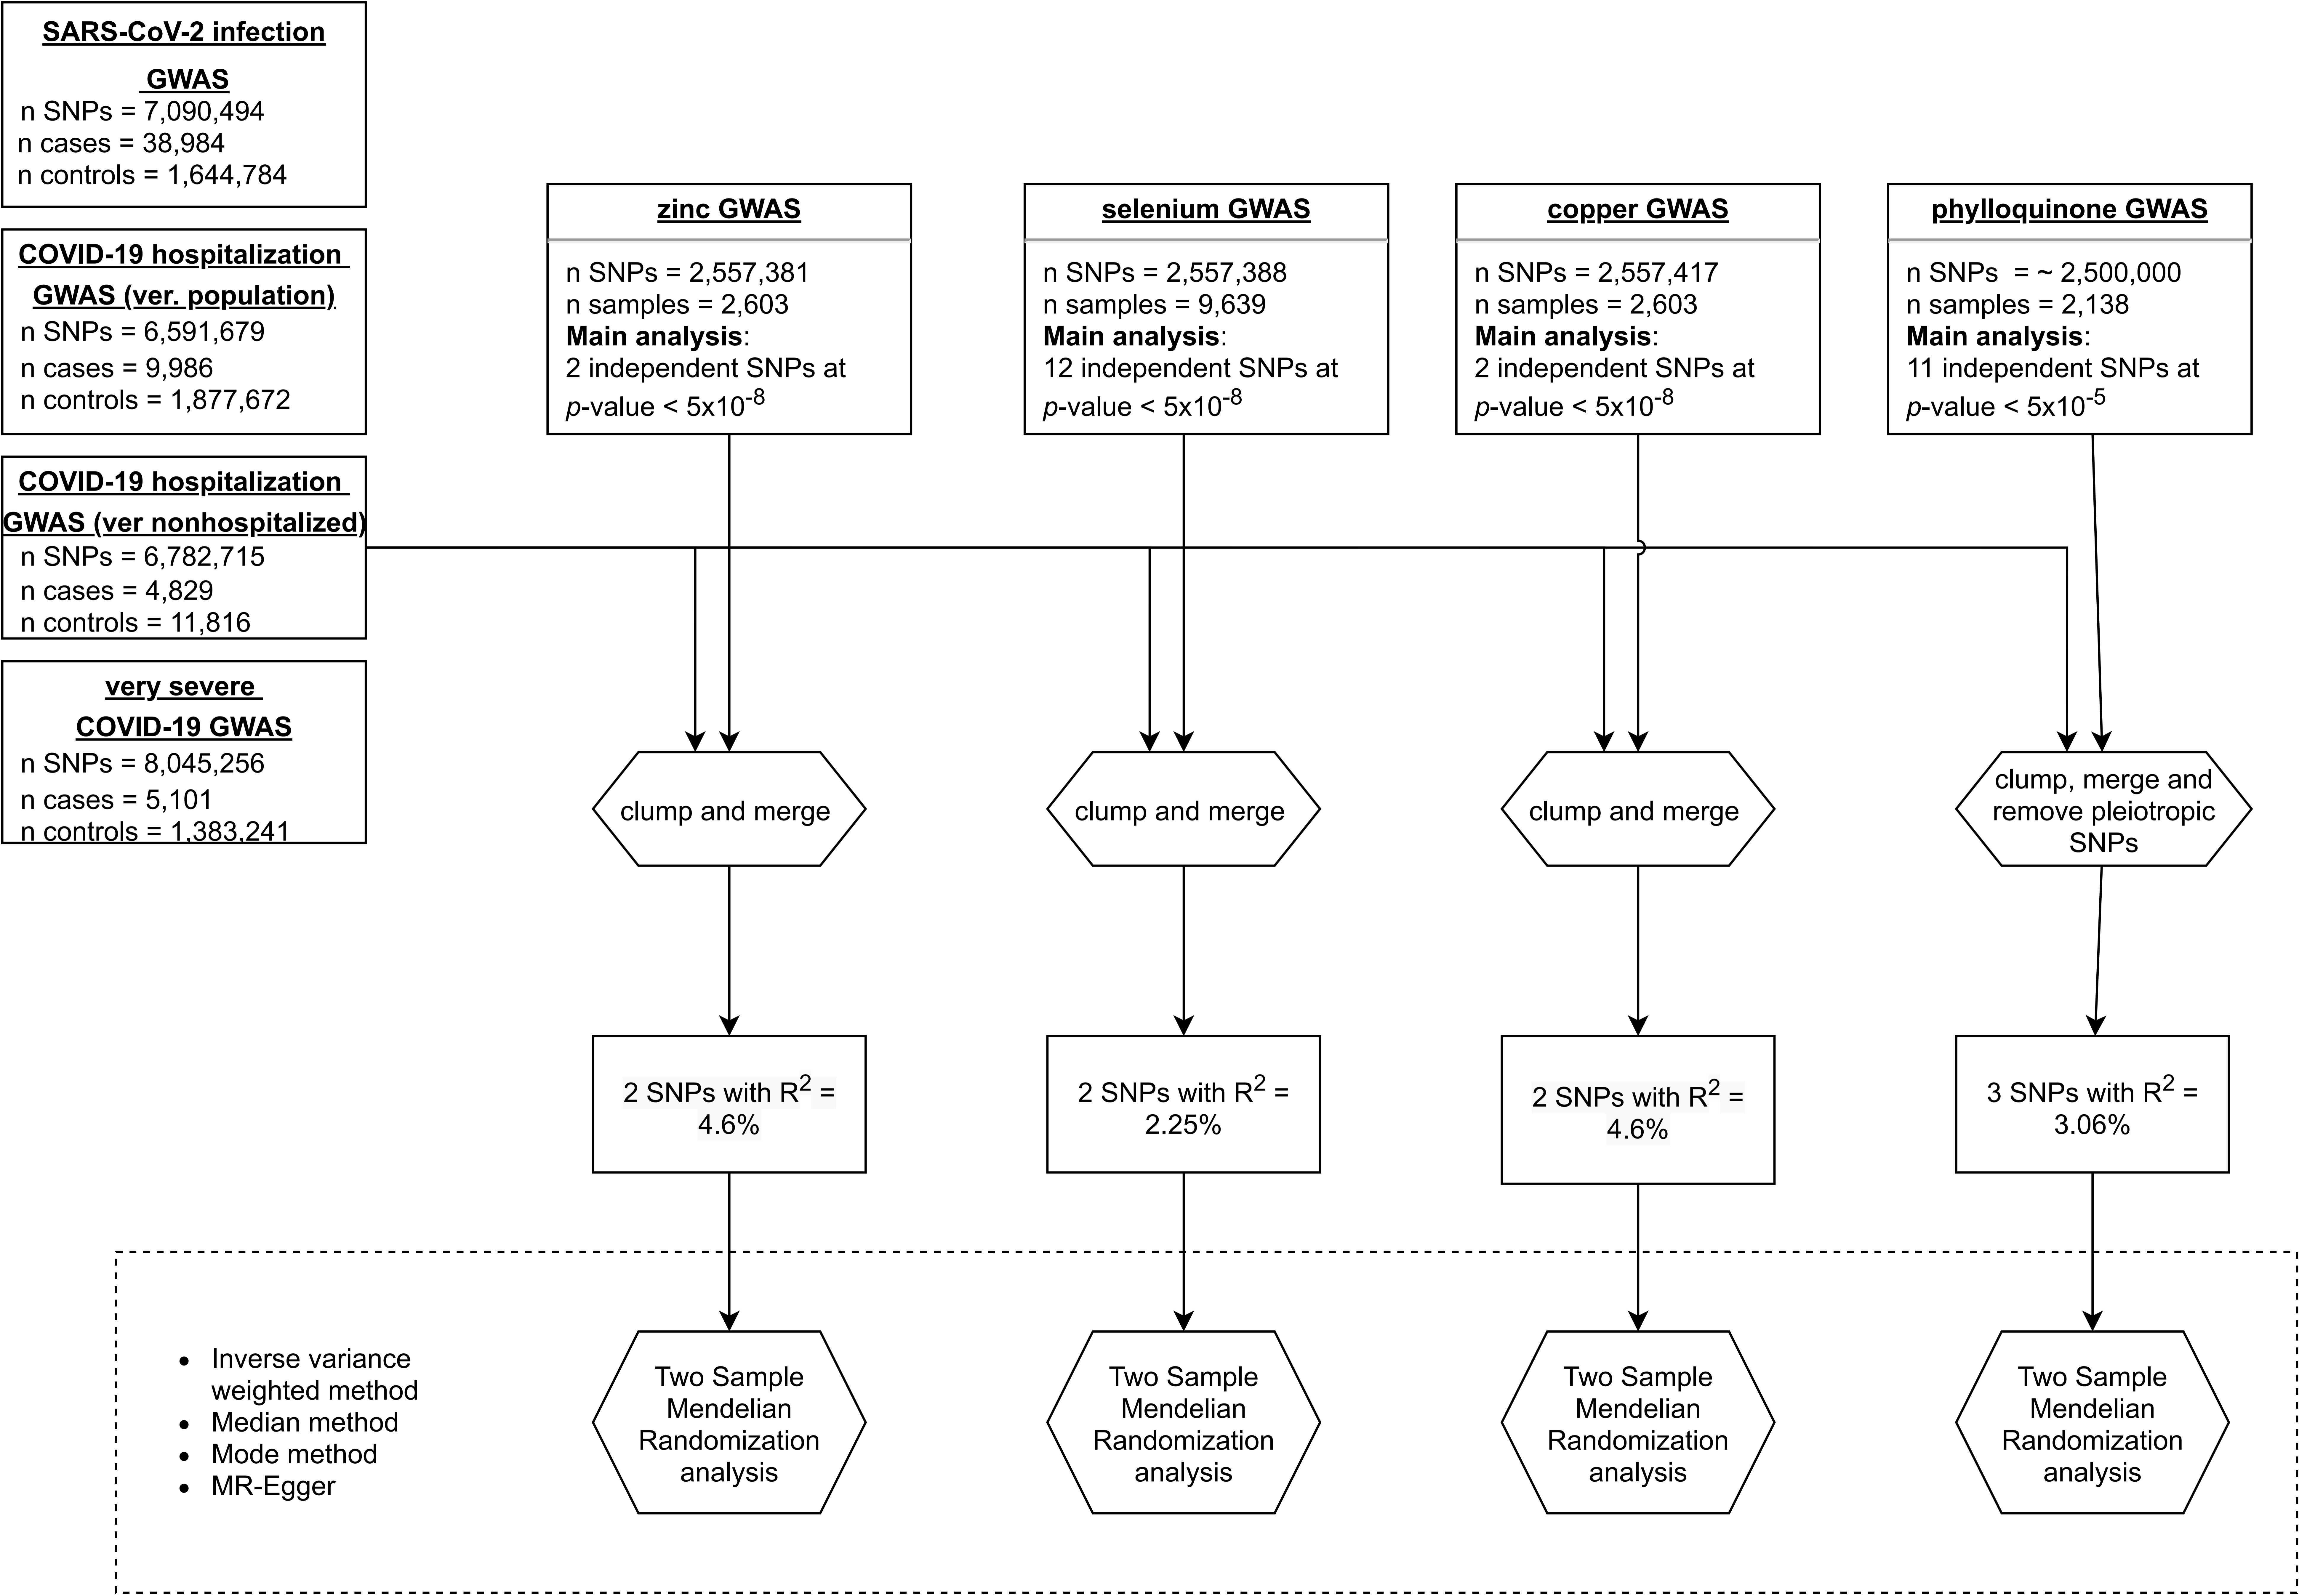

Supplement: s1 [file s1]
